# Supplementary material
Source: PubMed Central journal article supplement (PMC6386730)

**Dataset 1: Chromosome visualizations for *P. falciparum*, *P. vivax*, *P. berghei*, *P. yoelii*, *P. knowlesi*, *B. microti*, and *T. gondii* samples.** Within each page, the top row shows the raw contact count matrices at 10 kb resolution, the second row shows the ICE-normalized contact count matrices at 10 kb resolution with domain score and mappability tracks, and the third row shows matrices of the Fit-Hi-C P-values assigned to the contacts. In these three matrices, unmappable regions are colored in white. In the domain score tracks, centromeres are indicated with a dashed line and dips that reach the threshold of a domain-like structure are marked with a black box. The fourth row shows the pairwise Euclidean distance matrices derived from the 3D model, and the bottom row shows the inferred configuration in 3D with red spheres indicating centromeres and blue spheres indicating telomeres.

*T.gondii*

Bradyzoites

Tachyzoites

chr1a

chr1a

Raw Counts

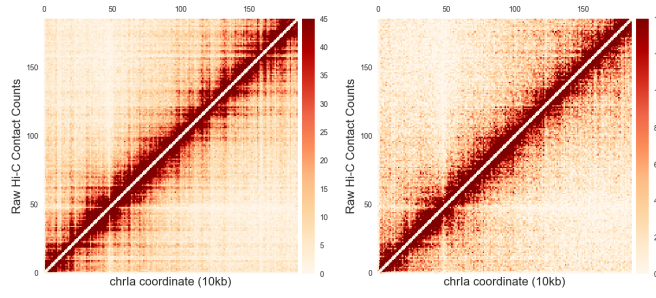

ICE  
Normalized  
Counts

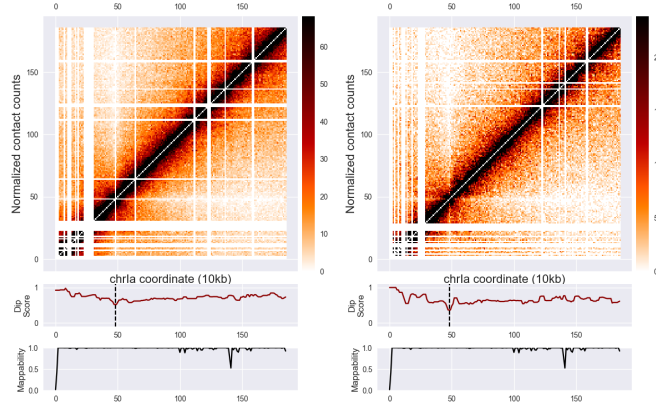

Fit-Hi-C  
p-values

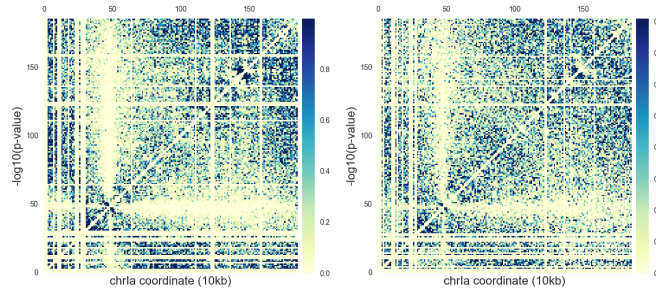

PASTIS  
Euclidean  
Distance

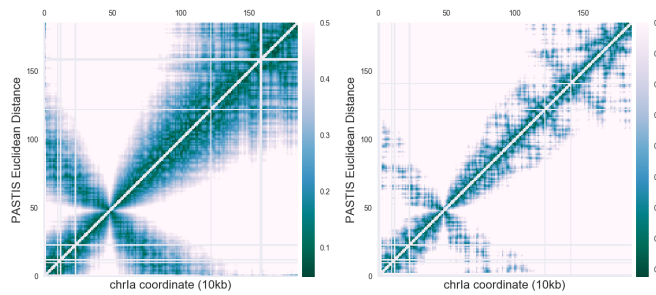

PASTIS 3D  
Model

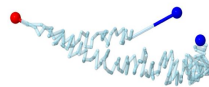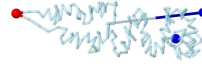

*T.gondii*

Bradyzoites

Tachyzoites

chr1b

chr1b

Raw Counts

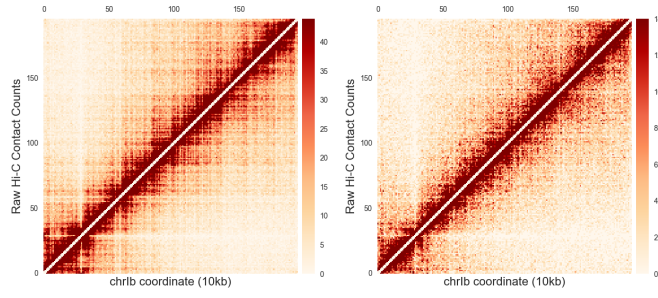

ICE Normalized Counts

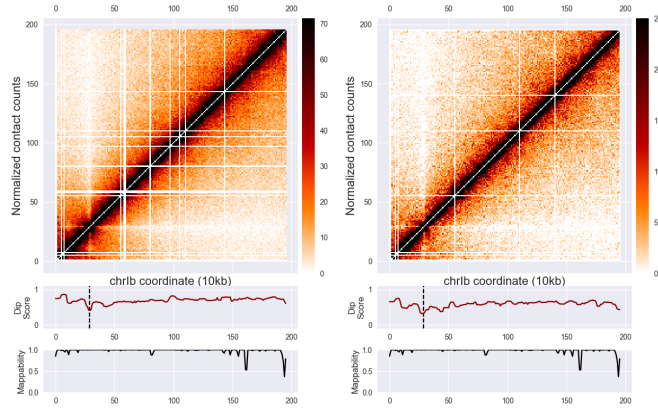

Fit-Hi-C p-values

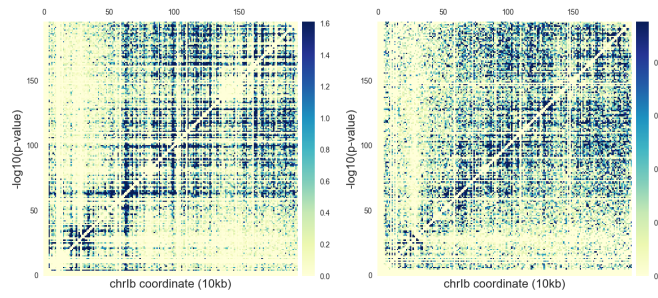

PASTIS Euclidean Distance

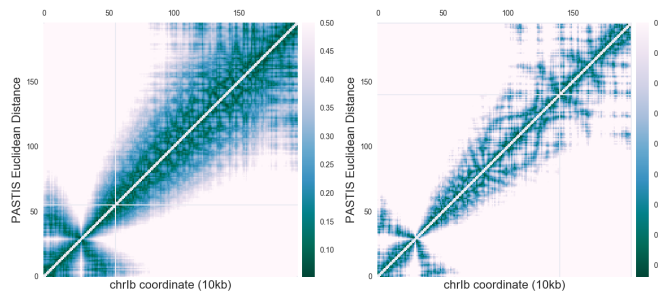

PASTIS 3D Model

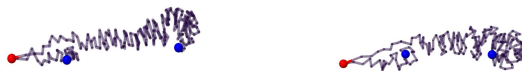

*T.gondii*

Bradyzoites

Tachyzoites

chrII

chrII

Raw Counts

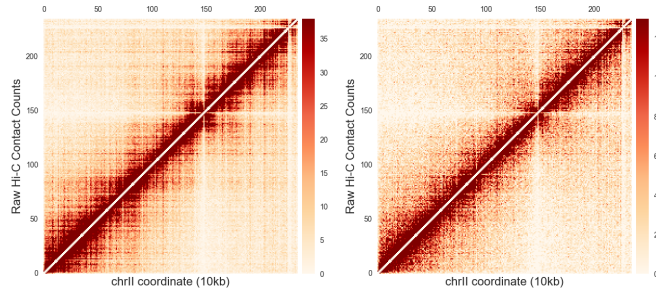

ICE Normalized Counts

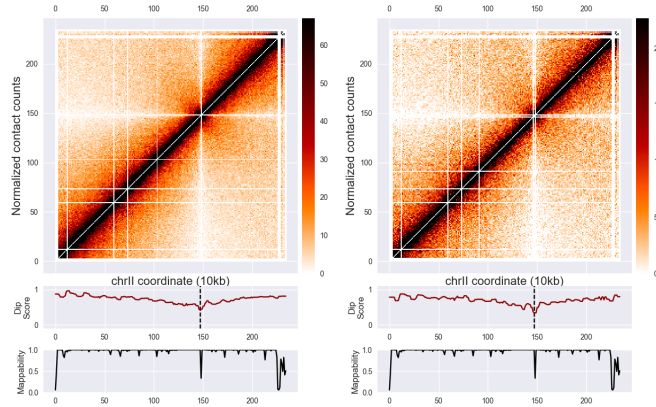

Fit-Hi-C p-values

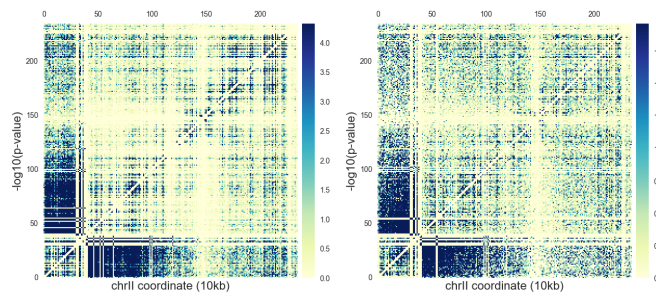

PASTIS Euclidean Distance

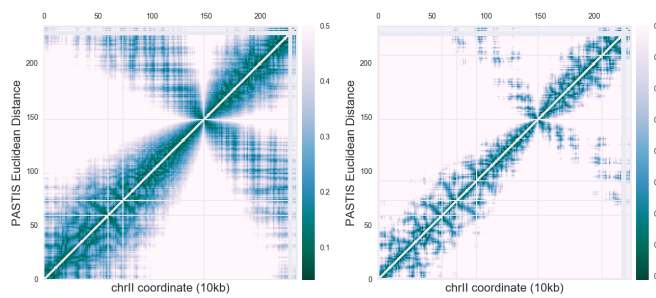

PASTIS 3D Model

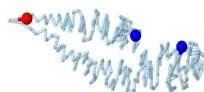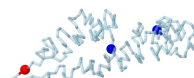

*T.gondii*

Bradyzoites

Tachyzoites

chrIII

chrIII

Raw Counts

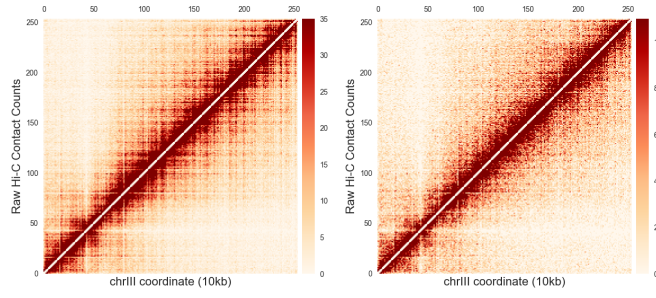

ICE Normalized Counts

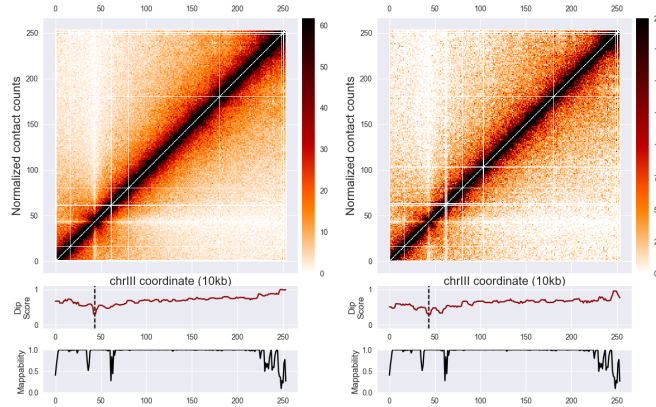

Fit-Hi-C p-values

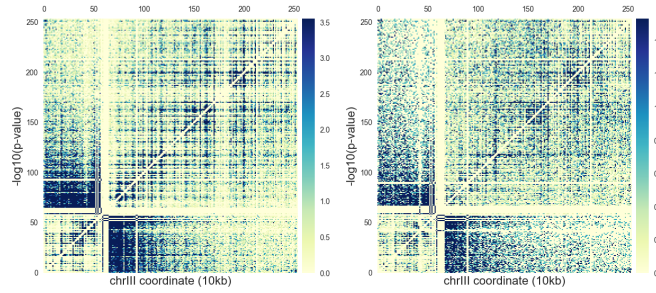

PASTIS Euclidean Distance

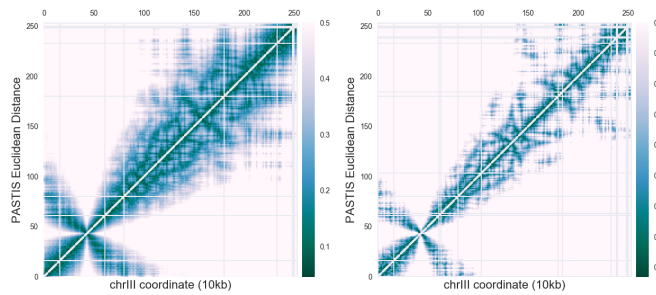

PASTIS 3D Model

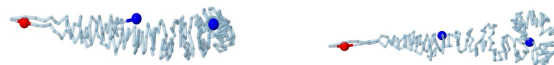

*T.gondii*

Bradyzoites

Tachyzoites

chrIV

chrIV

Raw Counts

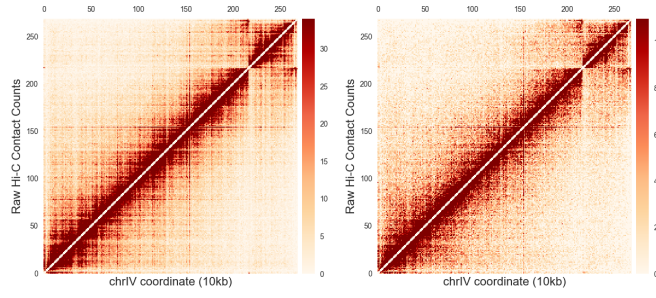

ICE Normalized Counts

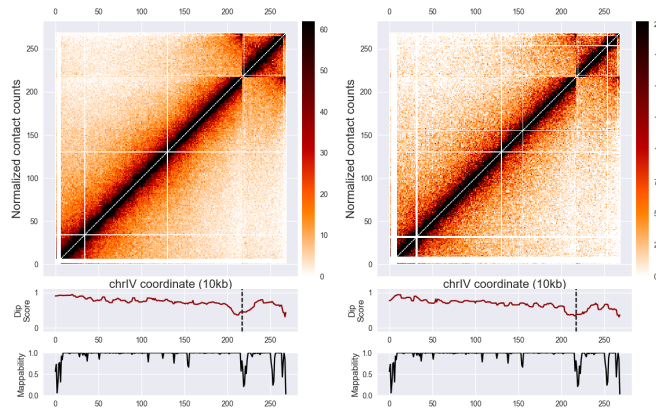

Fit-Hi-C p-values

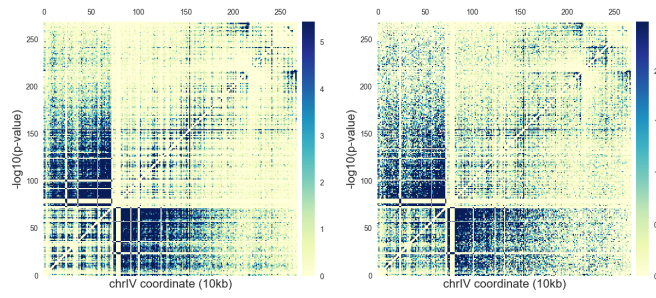

PASTIS Euclidean Distance

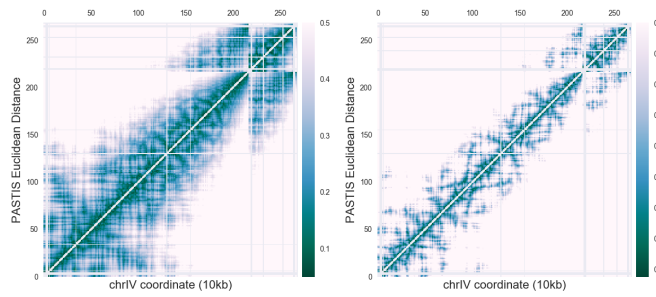

PASTIS 3D Model

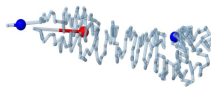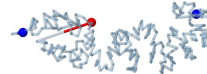

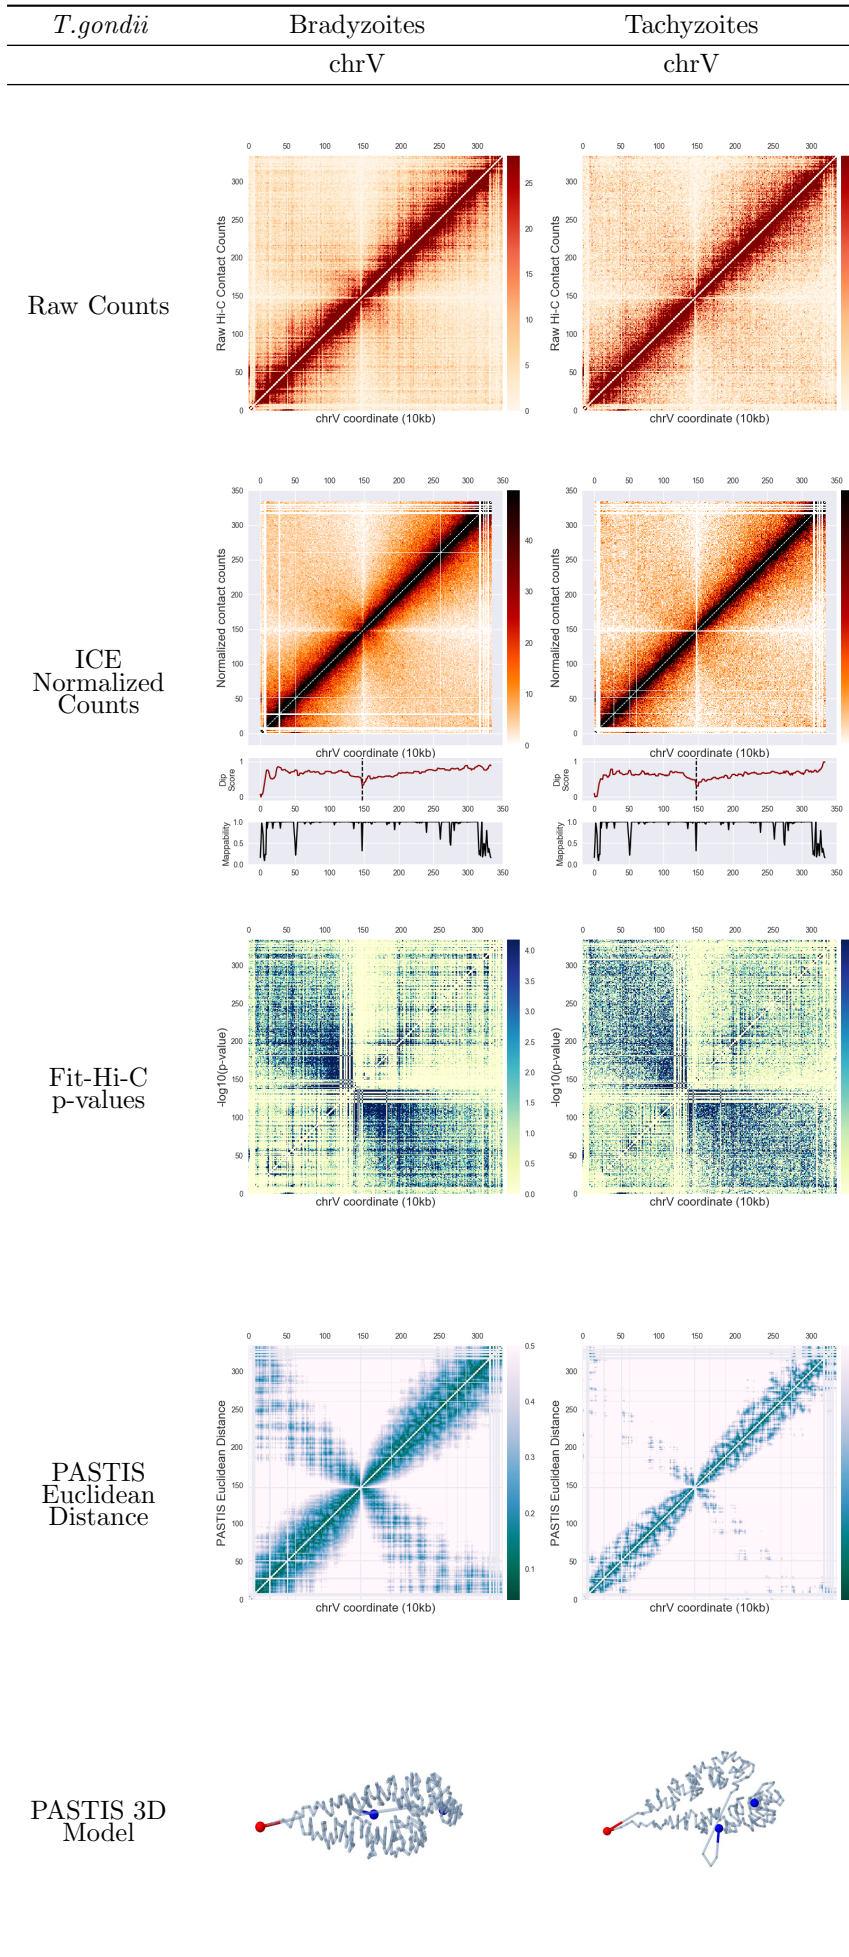

*T.gondii*

Bradyzoites

Tachyzoites

chrVI

chrVI

Raw Counts

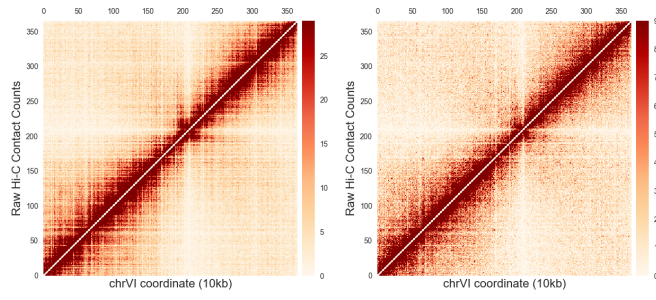

ICE Normalized Counts

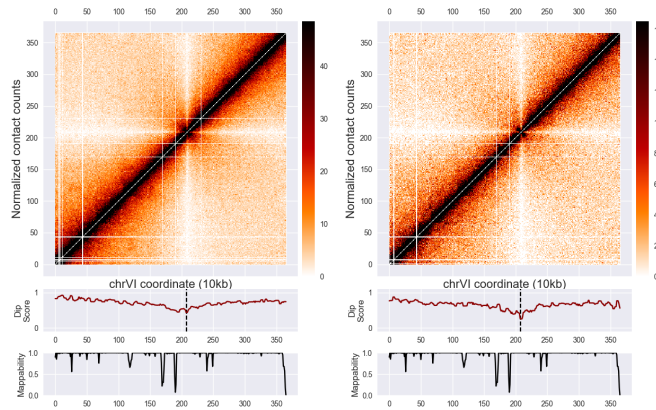

Fit-Hi-C p-values

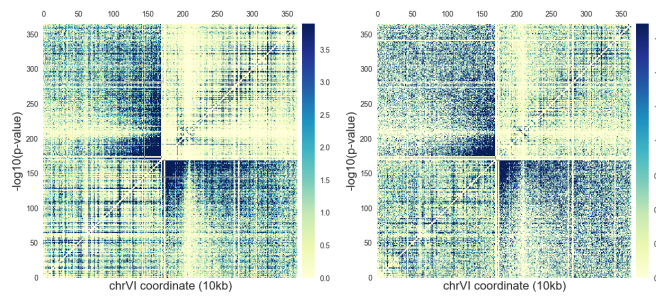

PASTIS Euclidean Distance

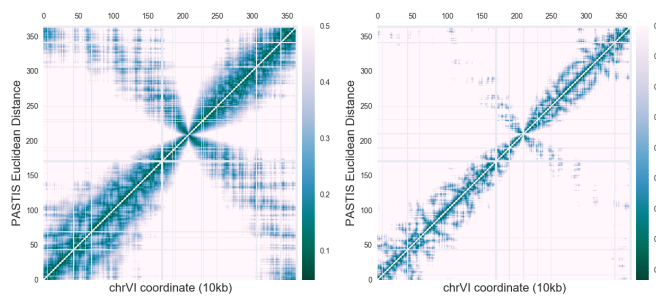

PASTIS 3D Model

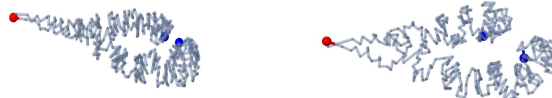



*T. gondii*

Bradyzoites

Tachyzoites

chrVIIa

chrVIIa

Raw Counts

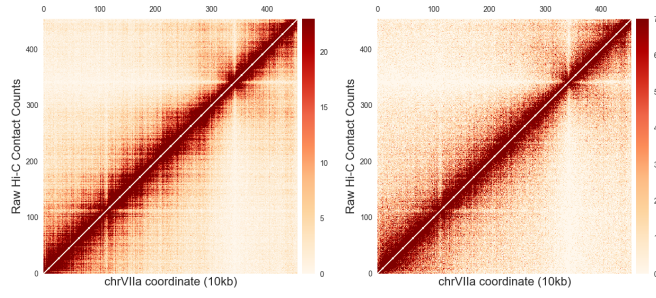

ICE Normalized Counts

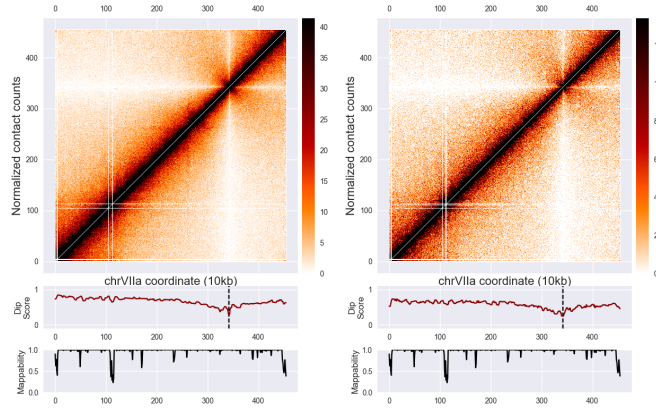

Fit-Hi-C p-values

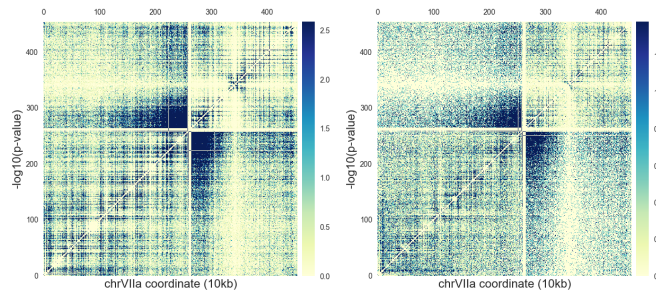

PASTIS Euclidean Distance

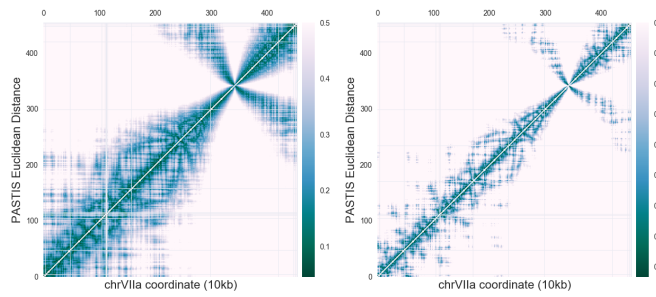

PASTIS 3D Model

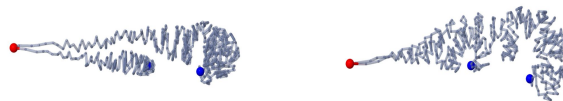

*T.gondii*

Bradyzoites

Tachyzoites

chrVIII

chrVIII

Raw Counts

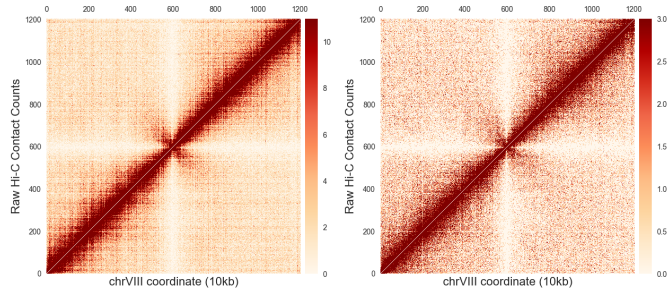

ICE Normalized Counts

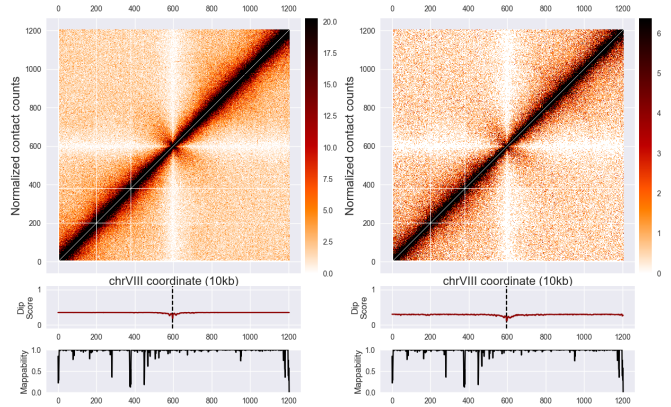

Fit-Hi-C p-values

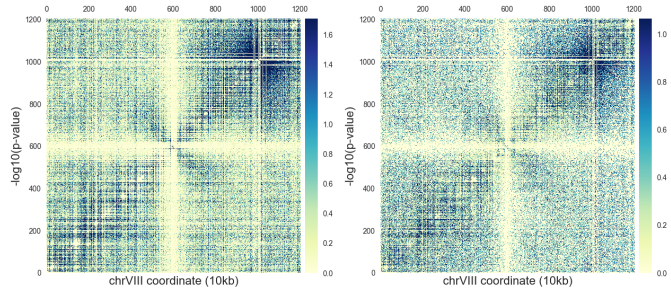

PASTIS Euclidean Distance

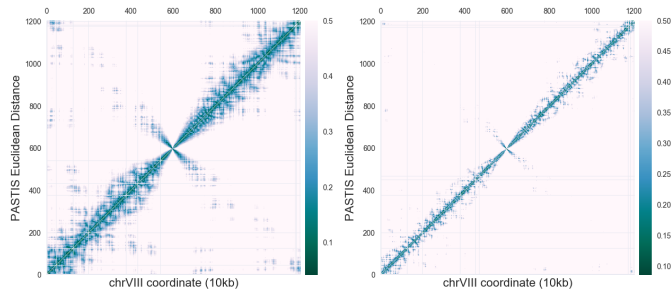

PASTIS 3D Model

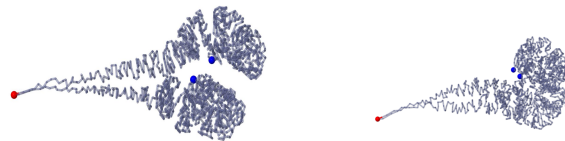

Raw Counts

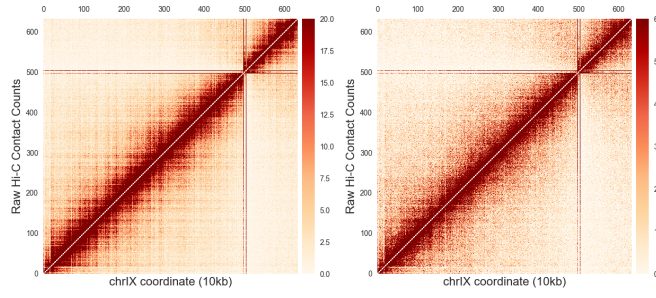

ICE Normalized Counts

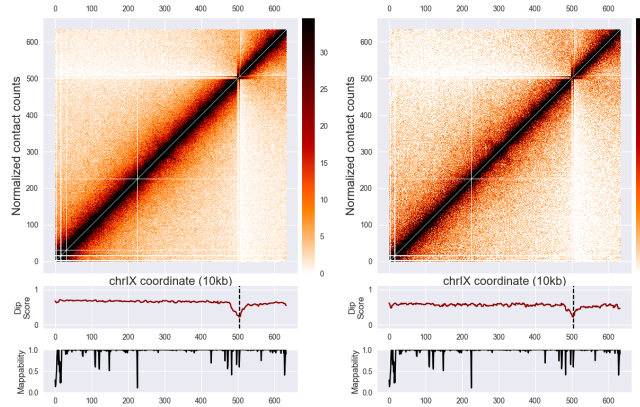

Fit-Hi-C p-values

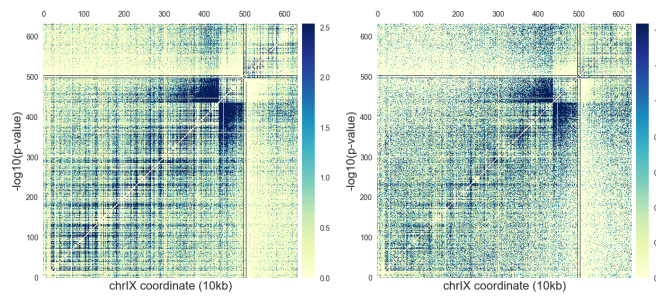

PASTIS Euclidean Distance

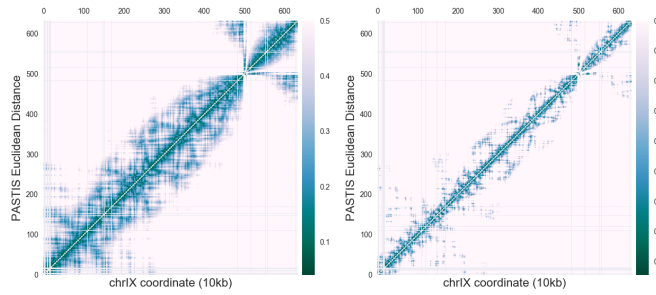

PASTIS 3D Model

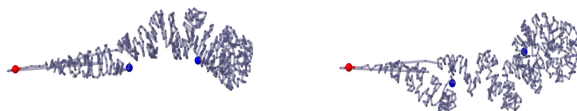

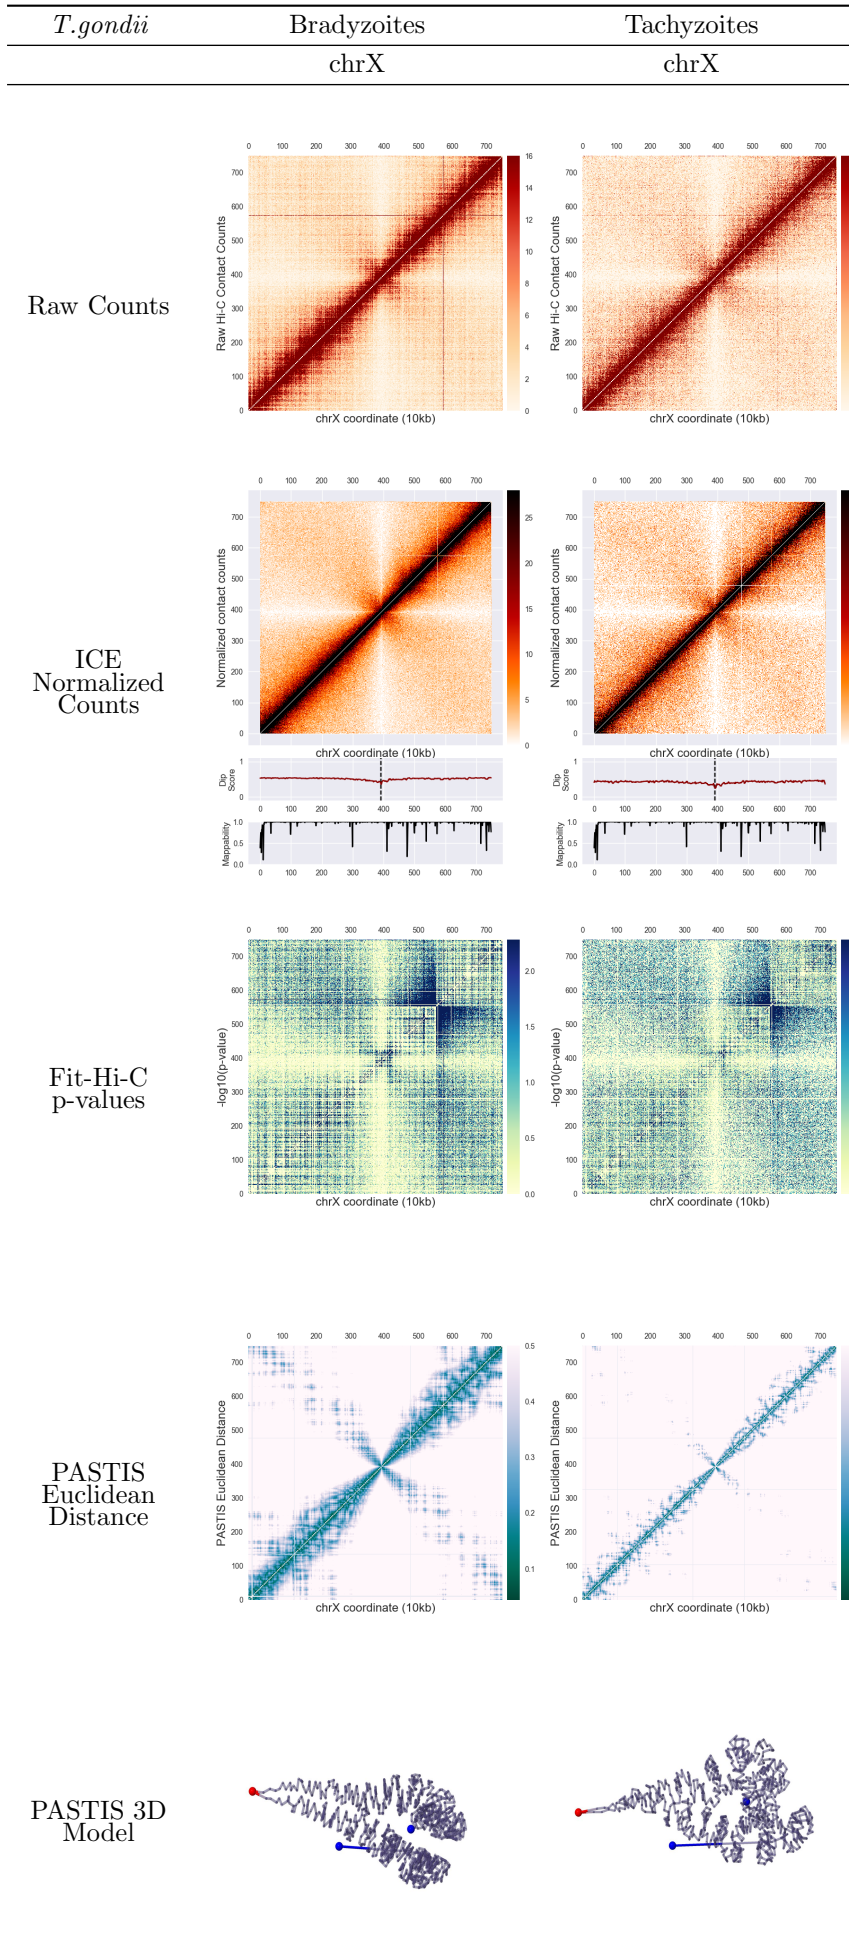

Raw Counts

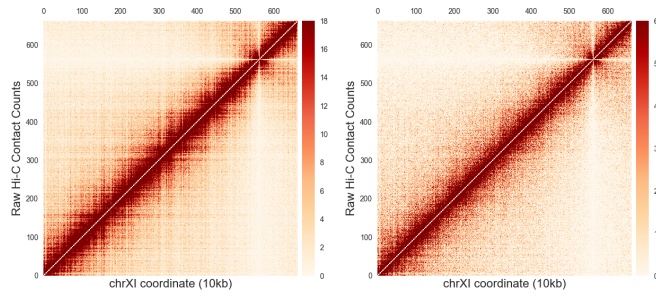

ICE Normalized Counts

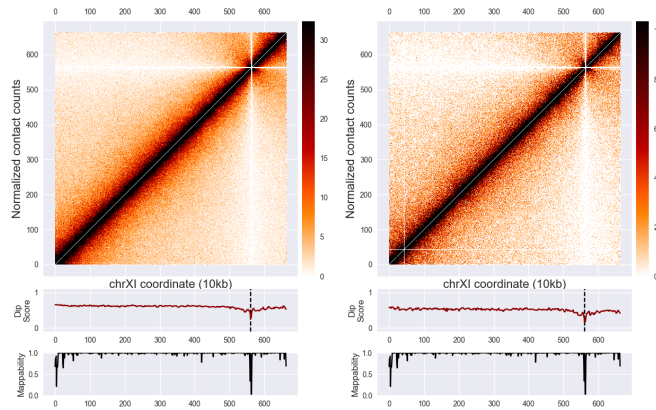

Fit-Hi-C p-values

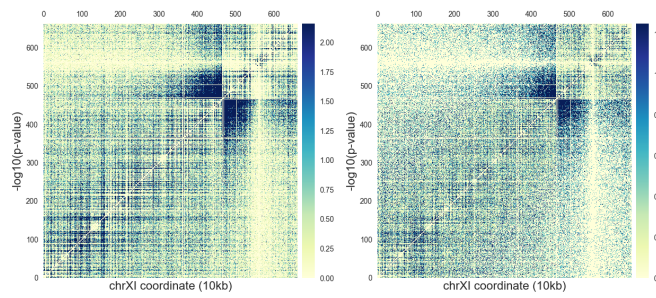

PASTIS Euclidean Distance

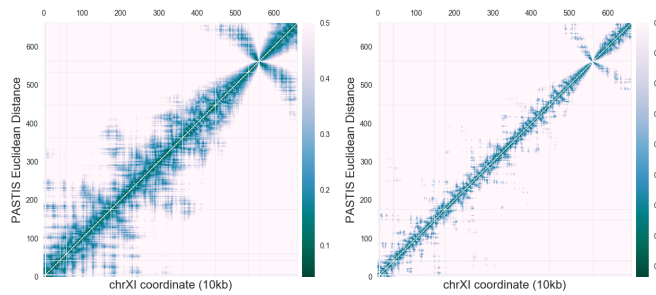

PASTIS 3D Model

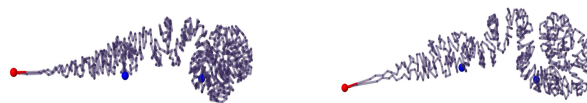

*T. gondii*

Bradyzoites

Tachyzoites

chrXII

chrXII

Raw Counts

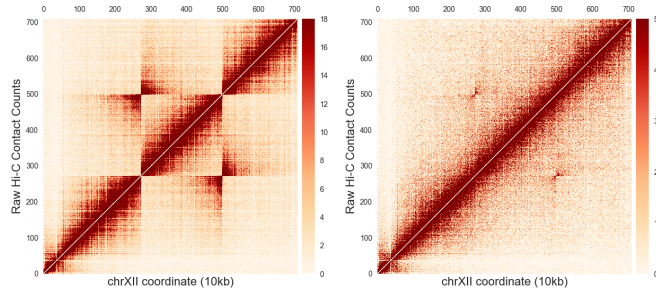

ICE Normalized Counts

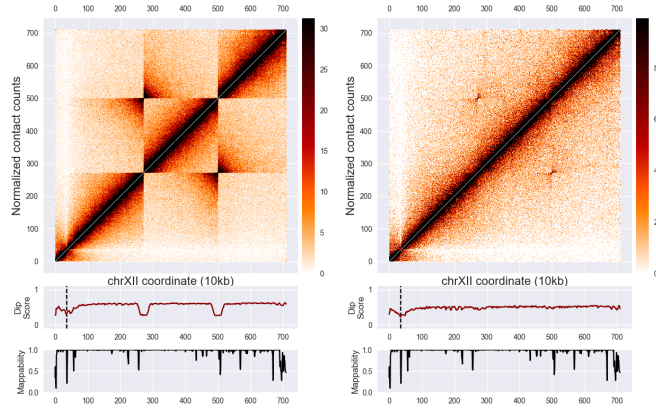

Fit-Hi-C p-values

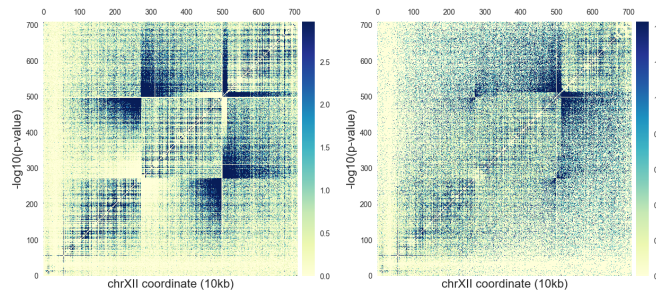

PASTIS Euclidean Distance

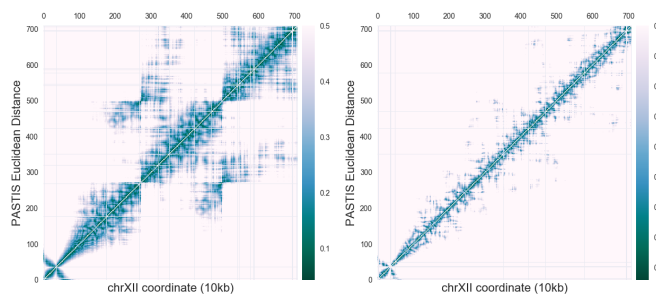

PASTIS 3D Model

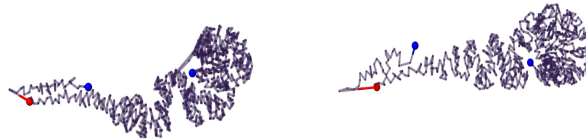

Raw Counts

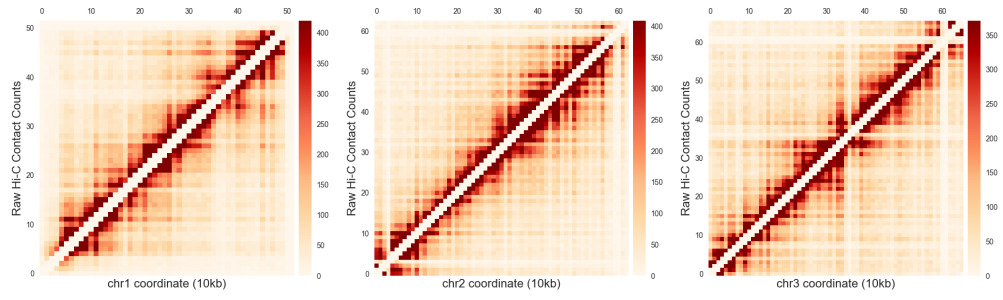

ICE  
Normalized  
Counts

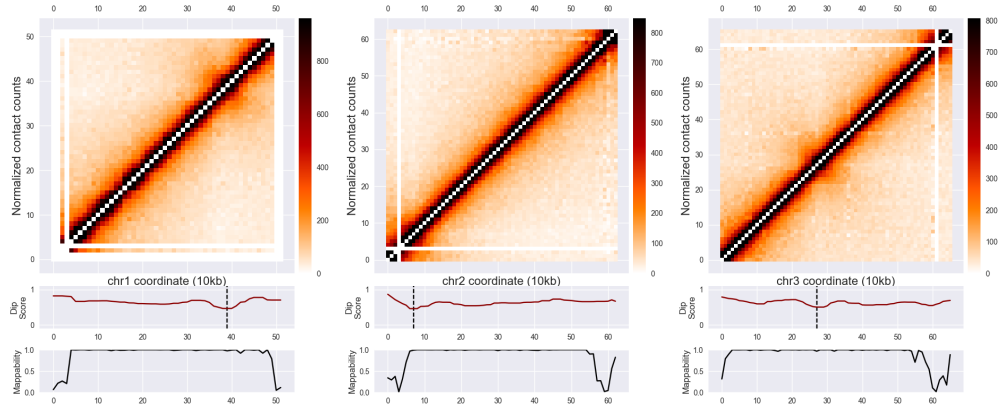

Fit-Hi-C  
p-values

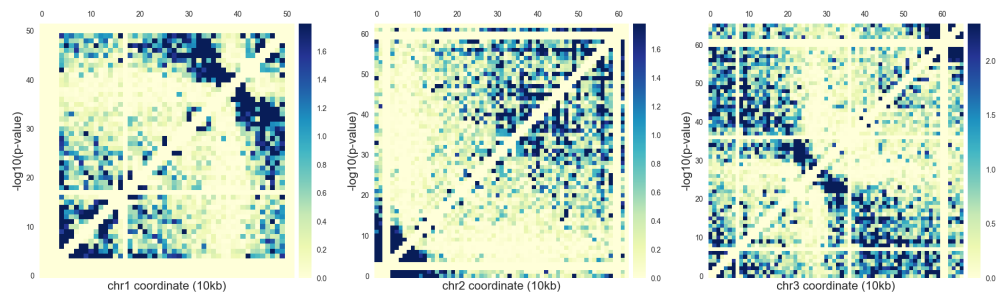

PASTIS  
Euclidean  
Distance

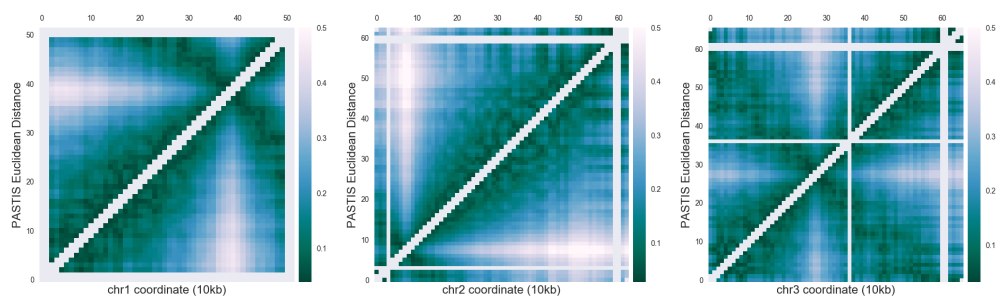

PASTIS 3D  
Model

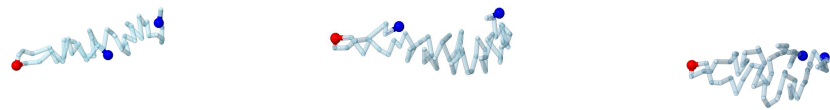

Raw Counts

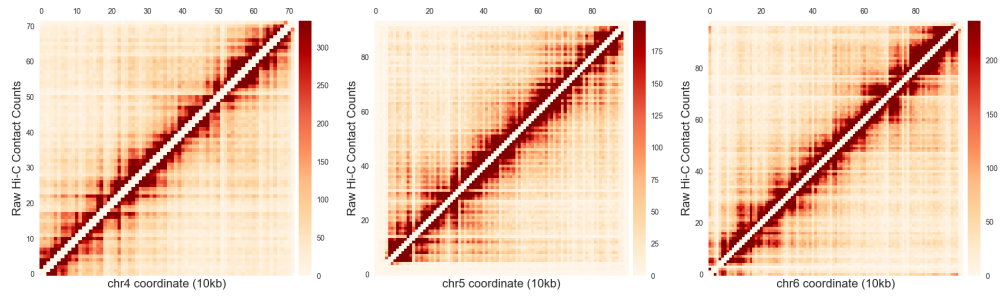

ICE Normalized Counts

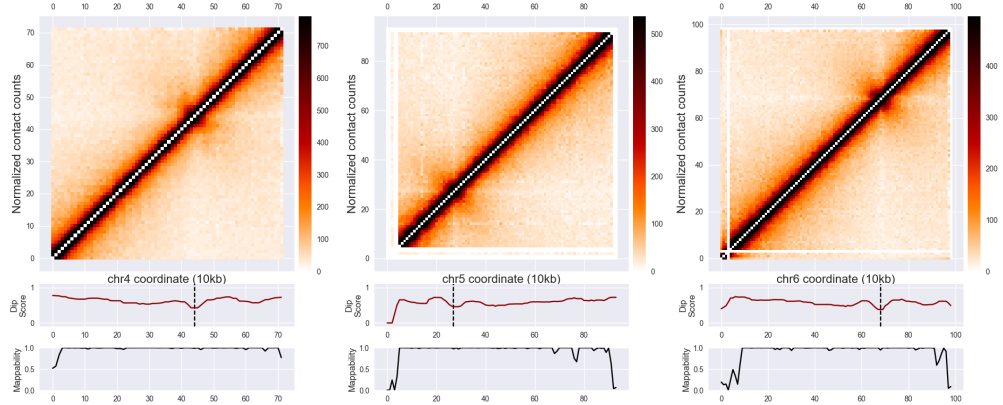

Fit-Hi-C p-values

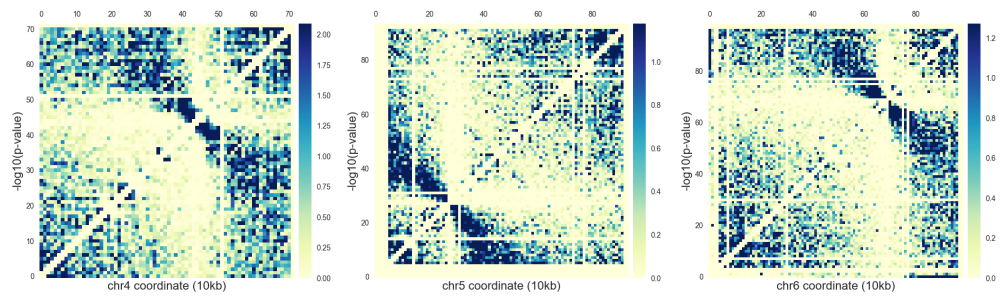

PASTIS Euclidean Distance

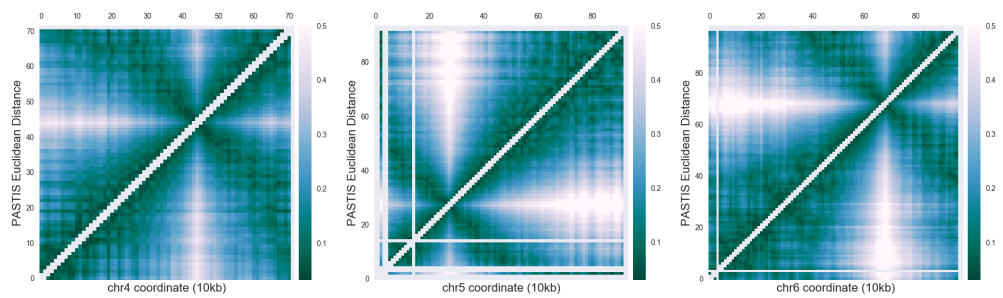

PASTIS 3D Model

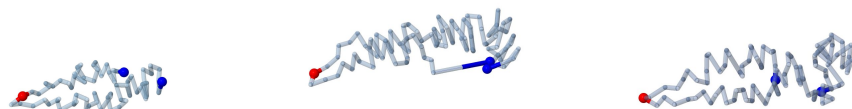



Raw Counts

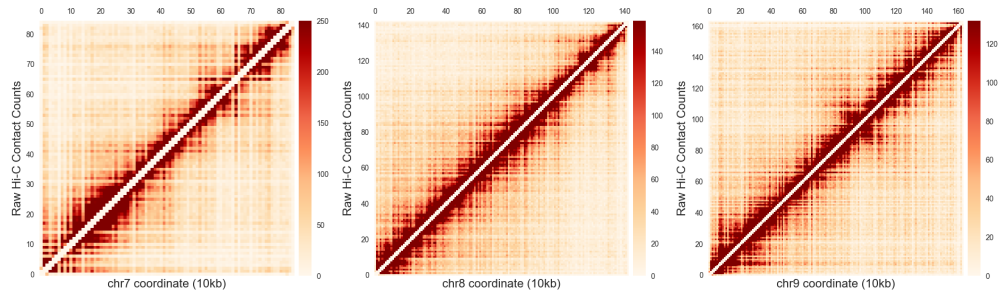

ICE Normalized Counts

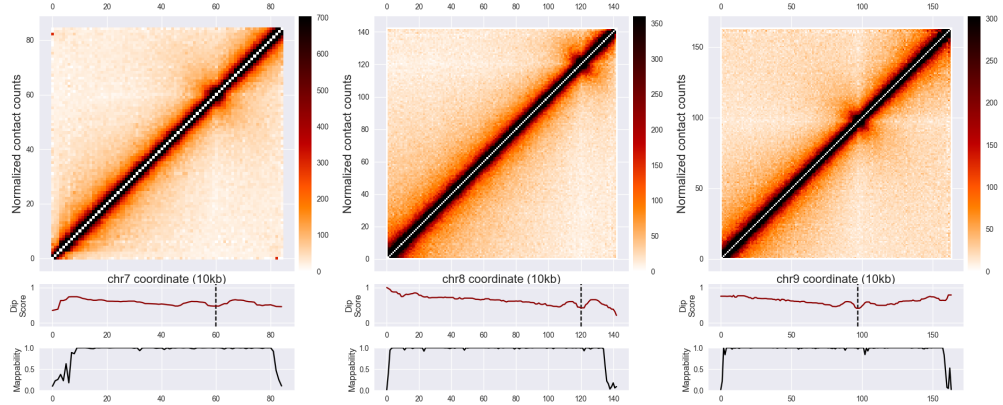

Fit-Hi-C p-values

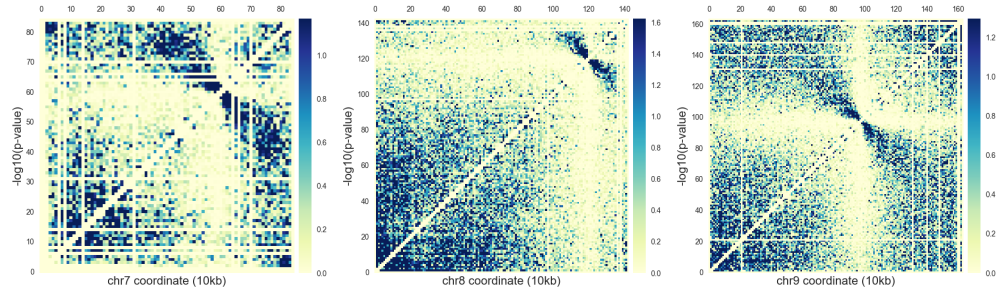

PASTIS Euclidean Distance

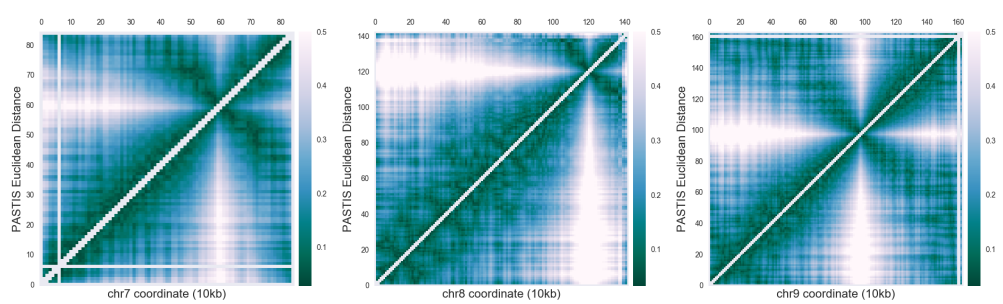

PASTIS 3D Model

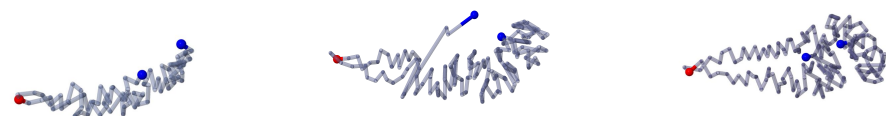

Raw Counts

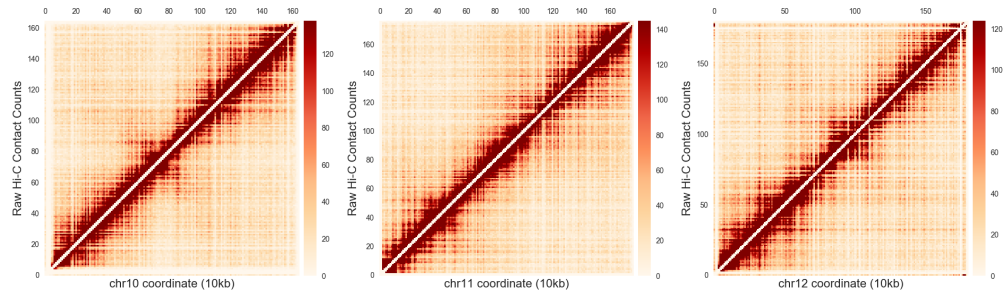

ICE Normalized Counts

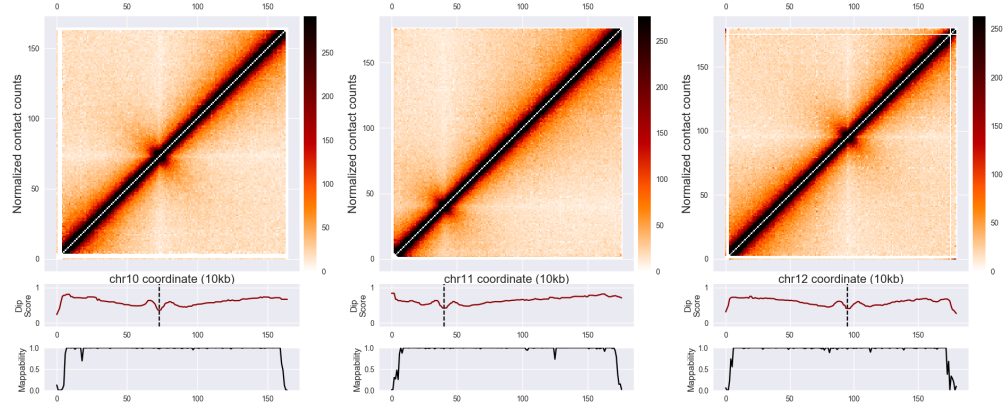

Fit-Hi-C p-values

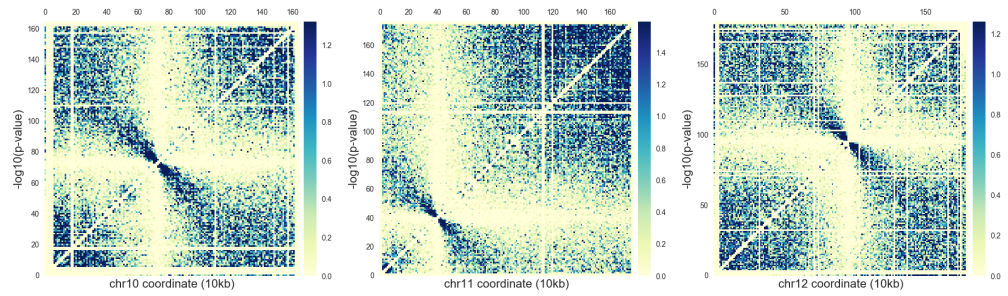

PASTIS Euclidean Distance

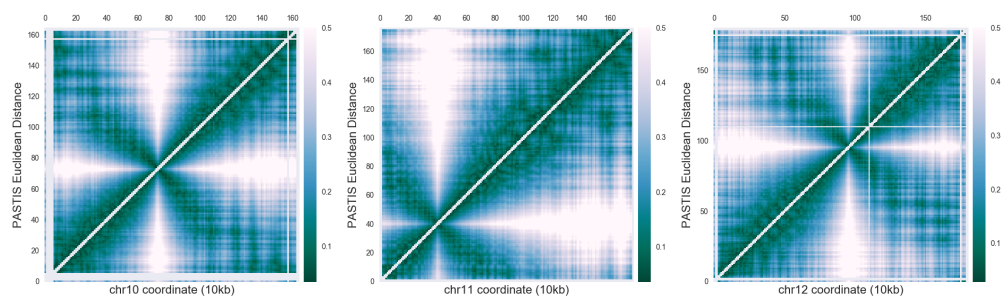

PASTIS 3D Model

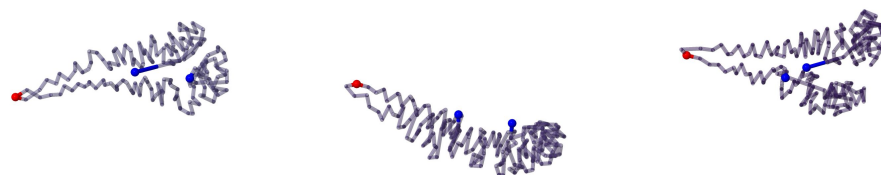

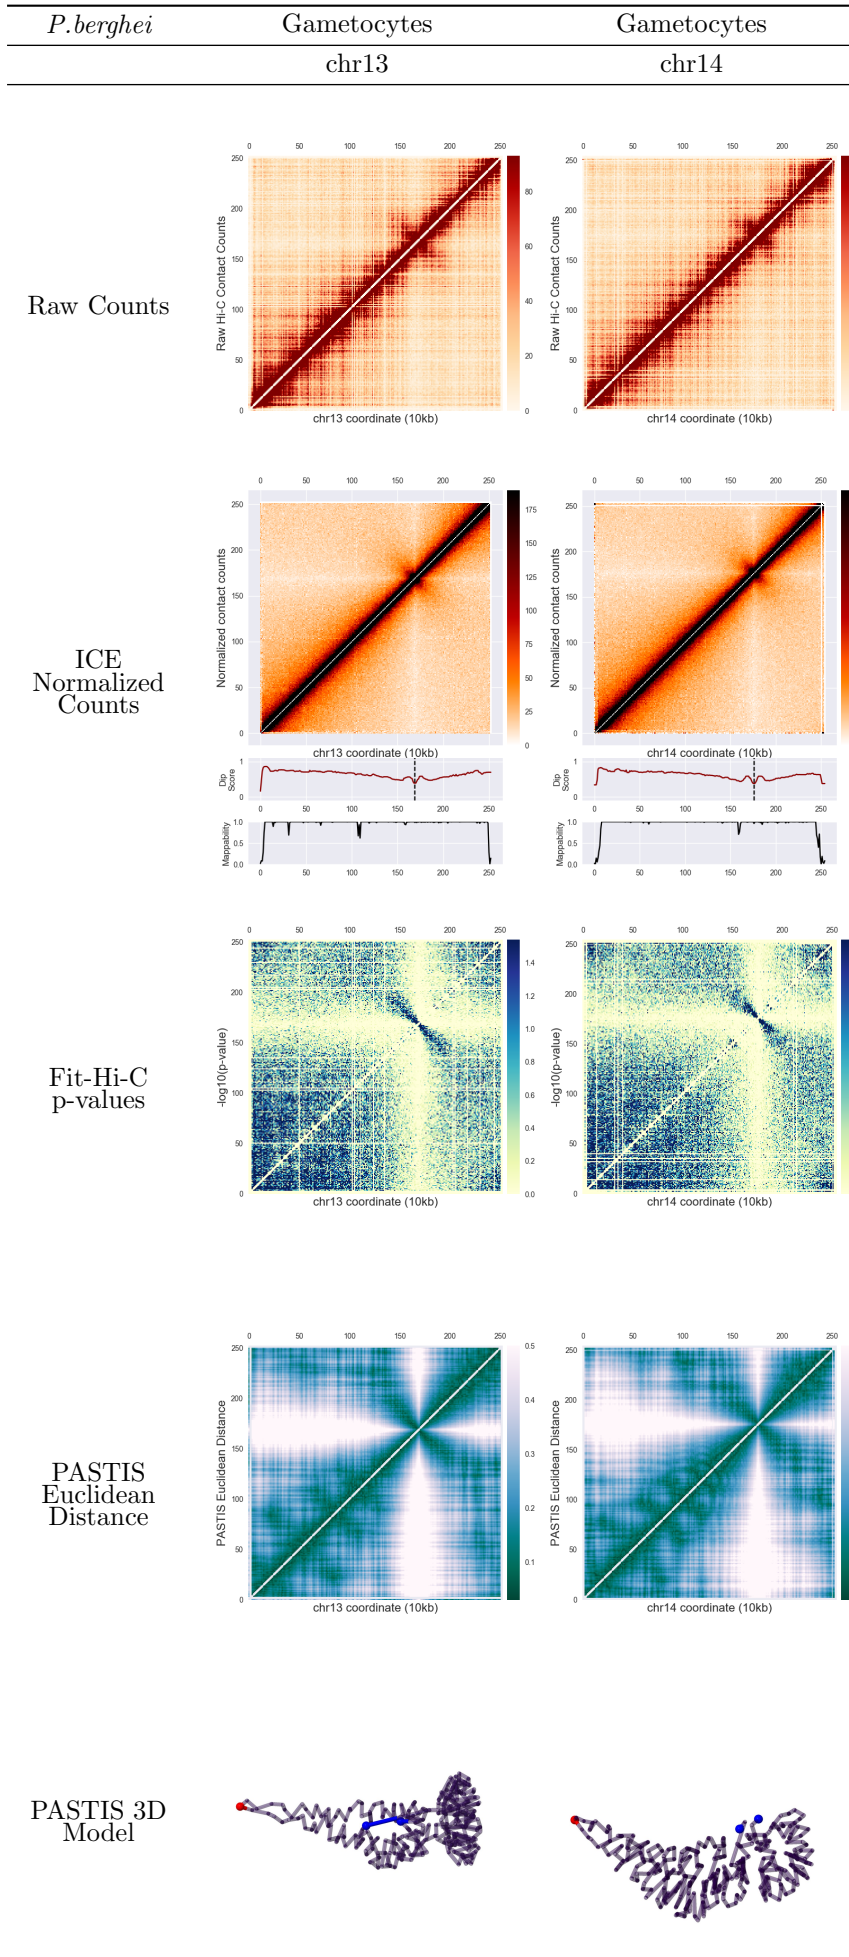

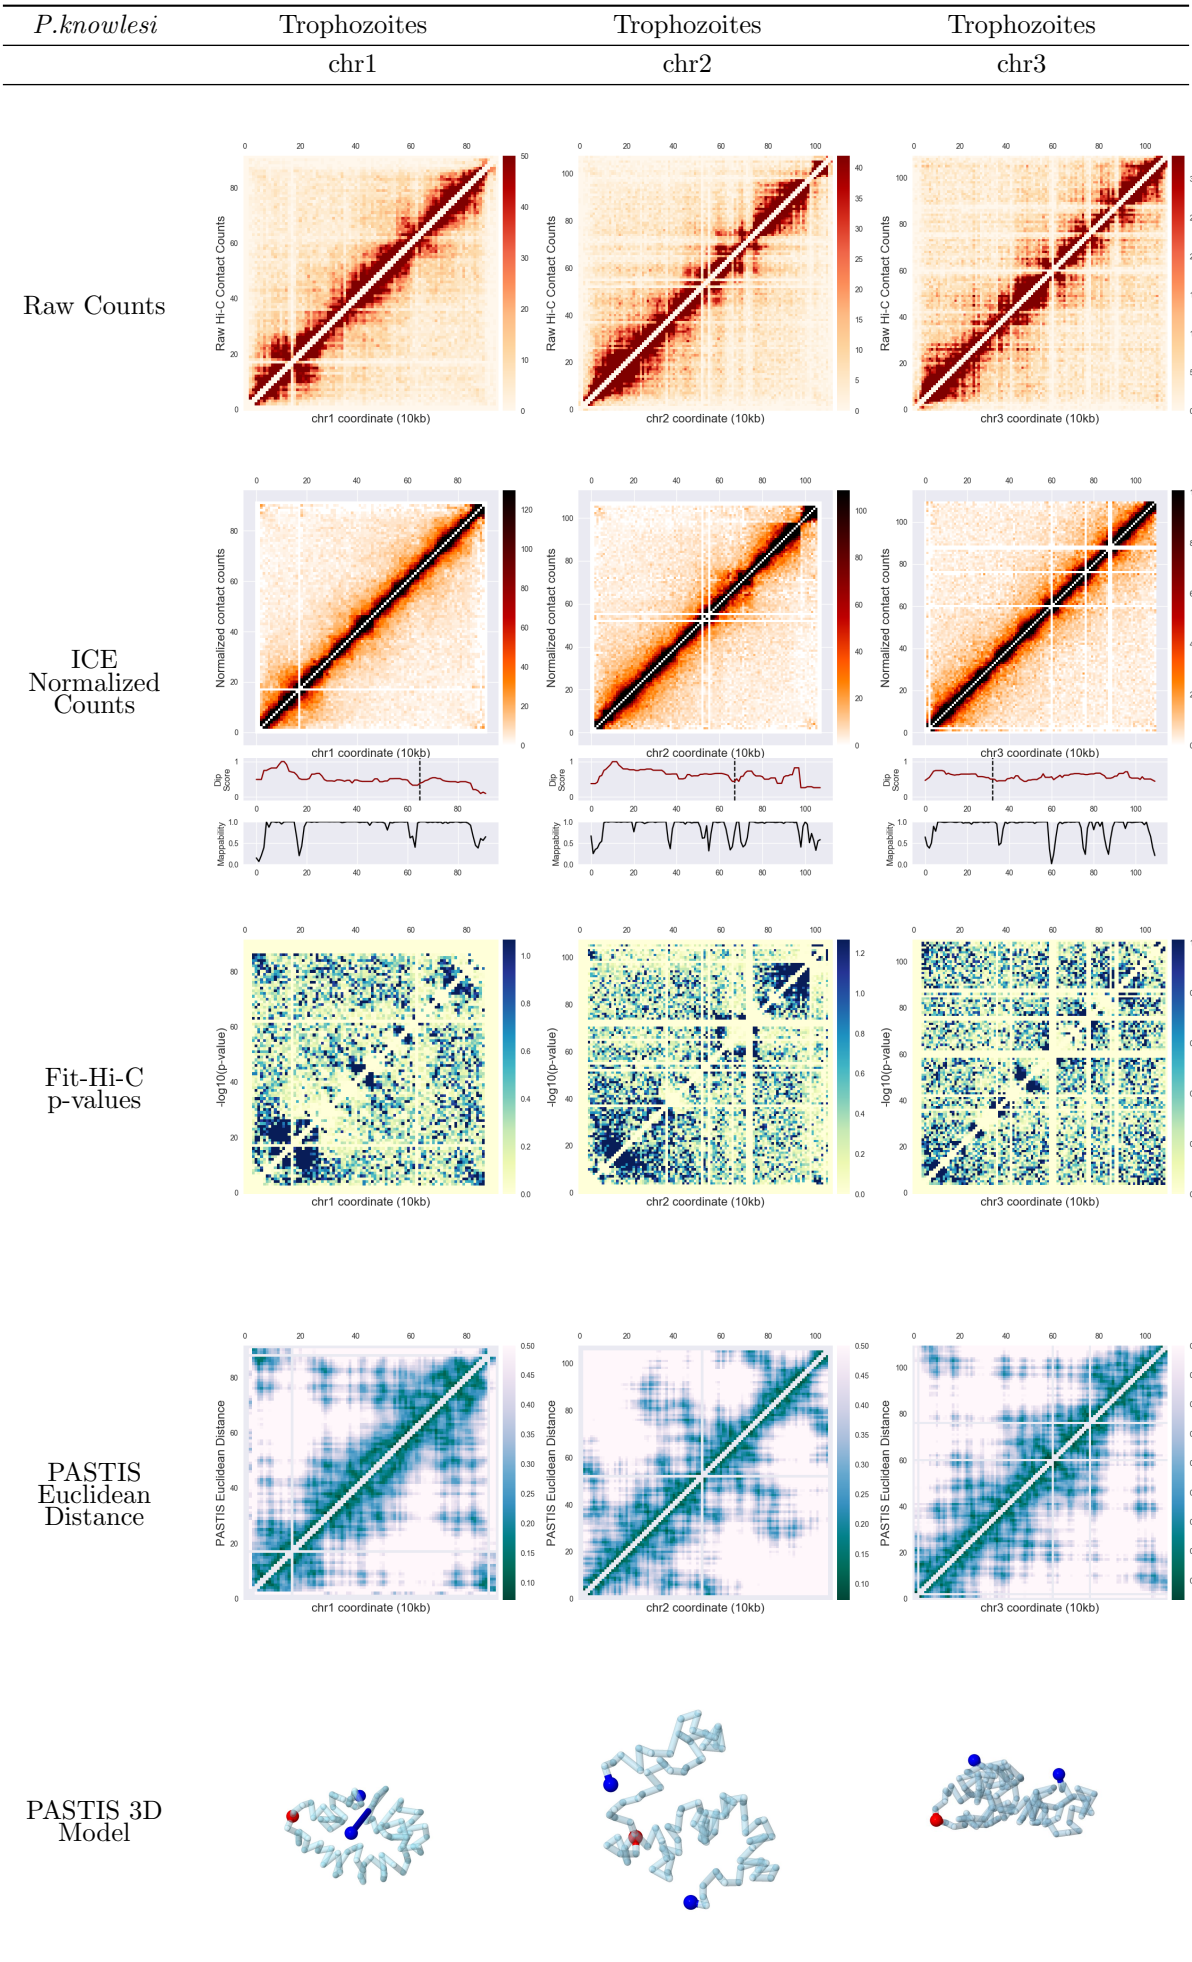

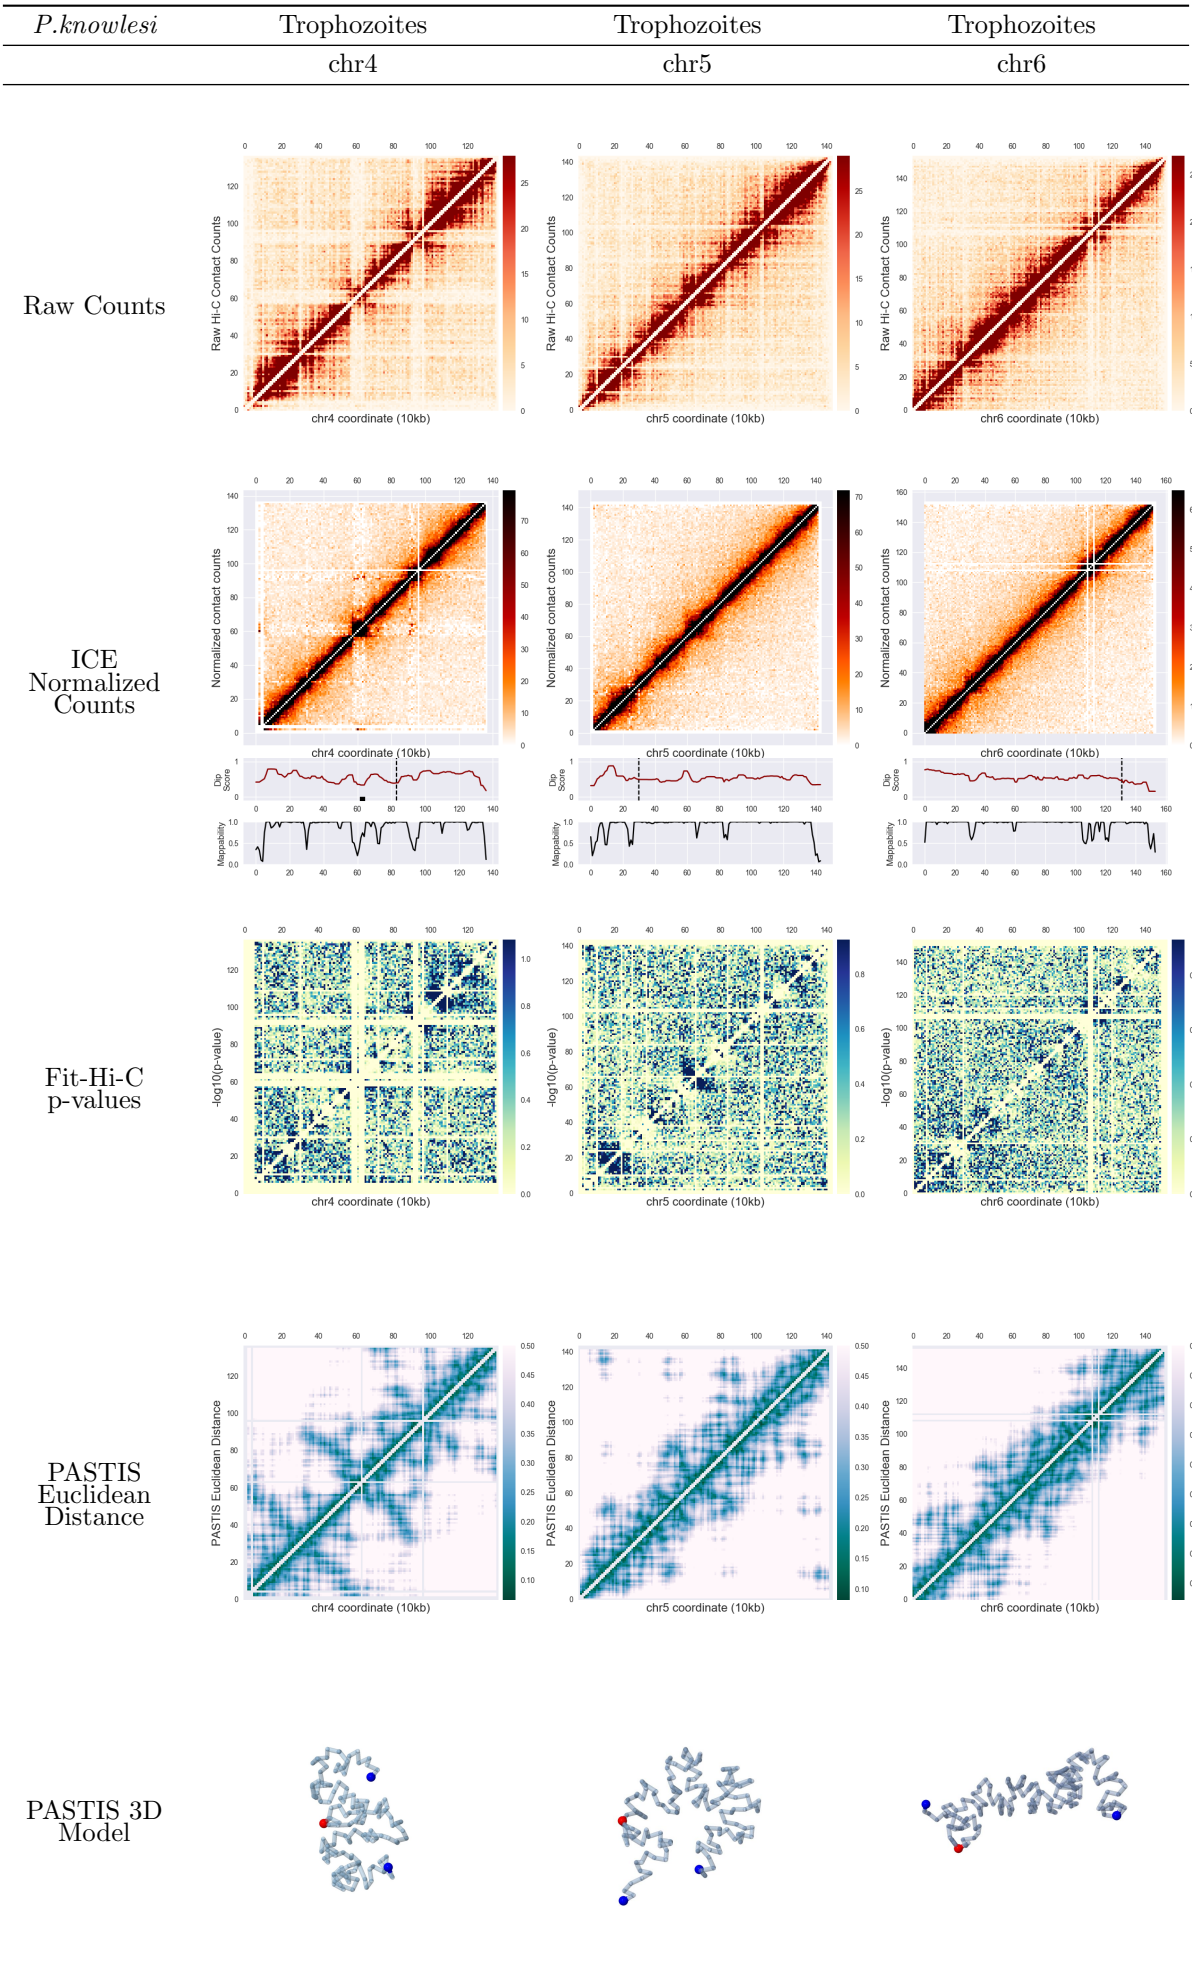

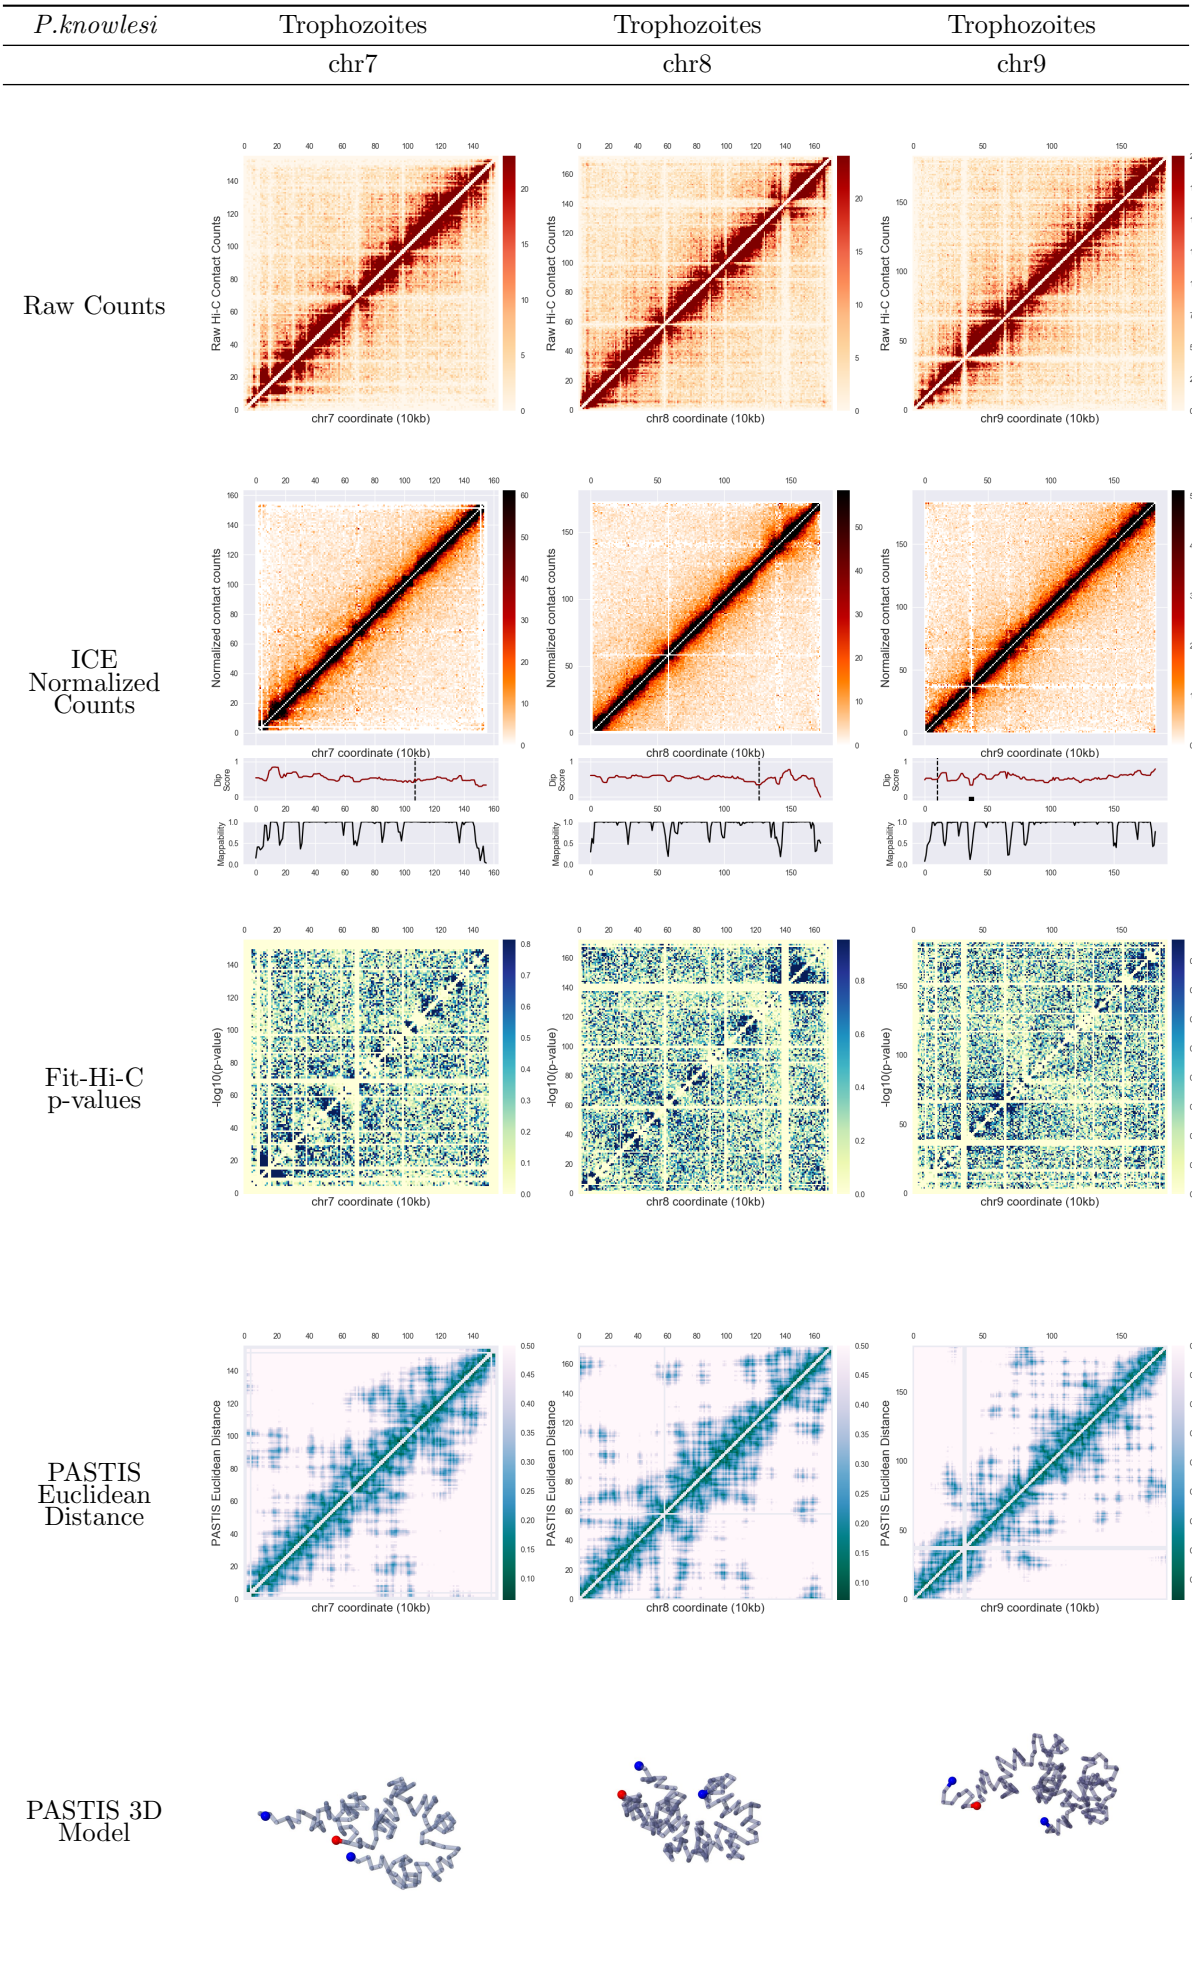

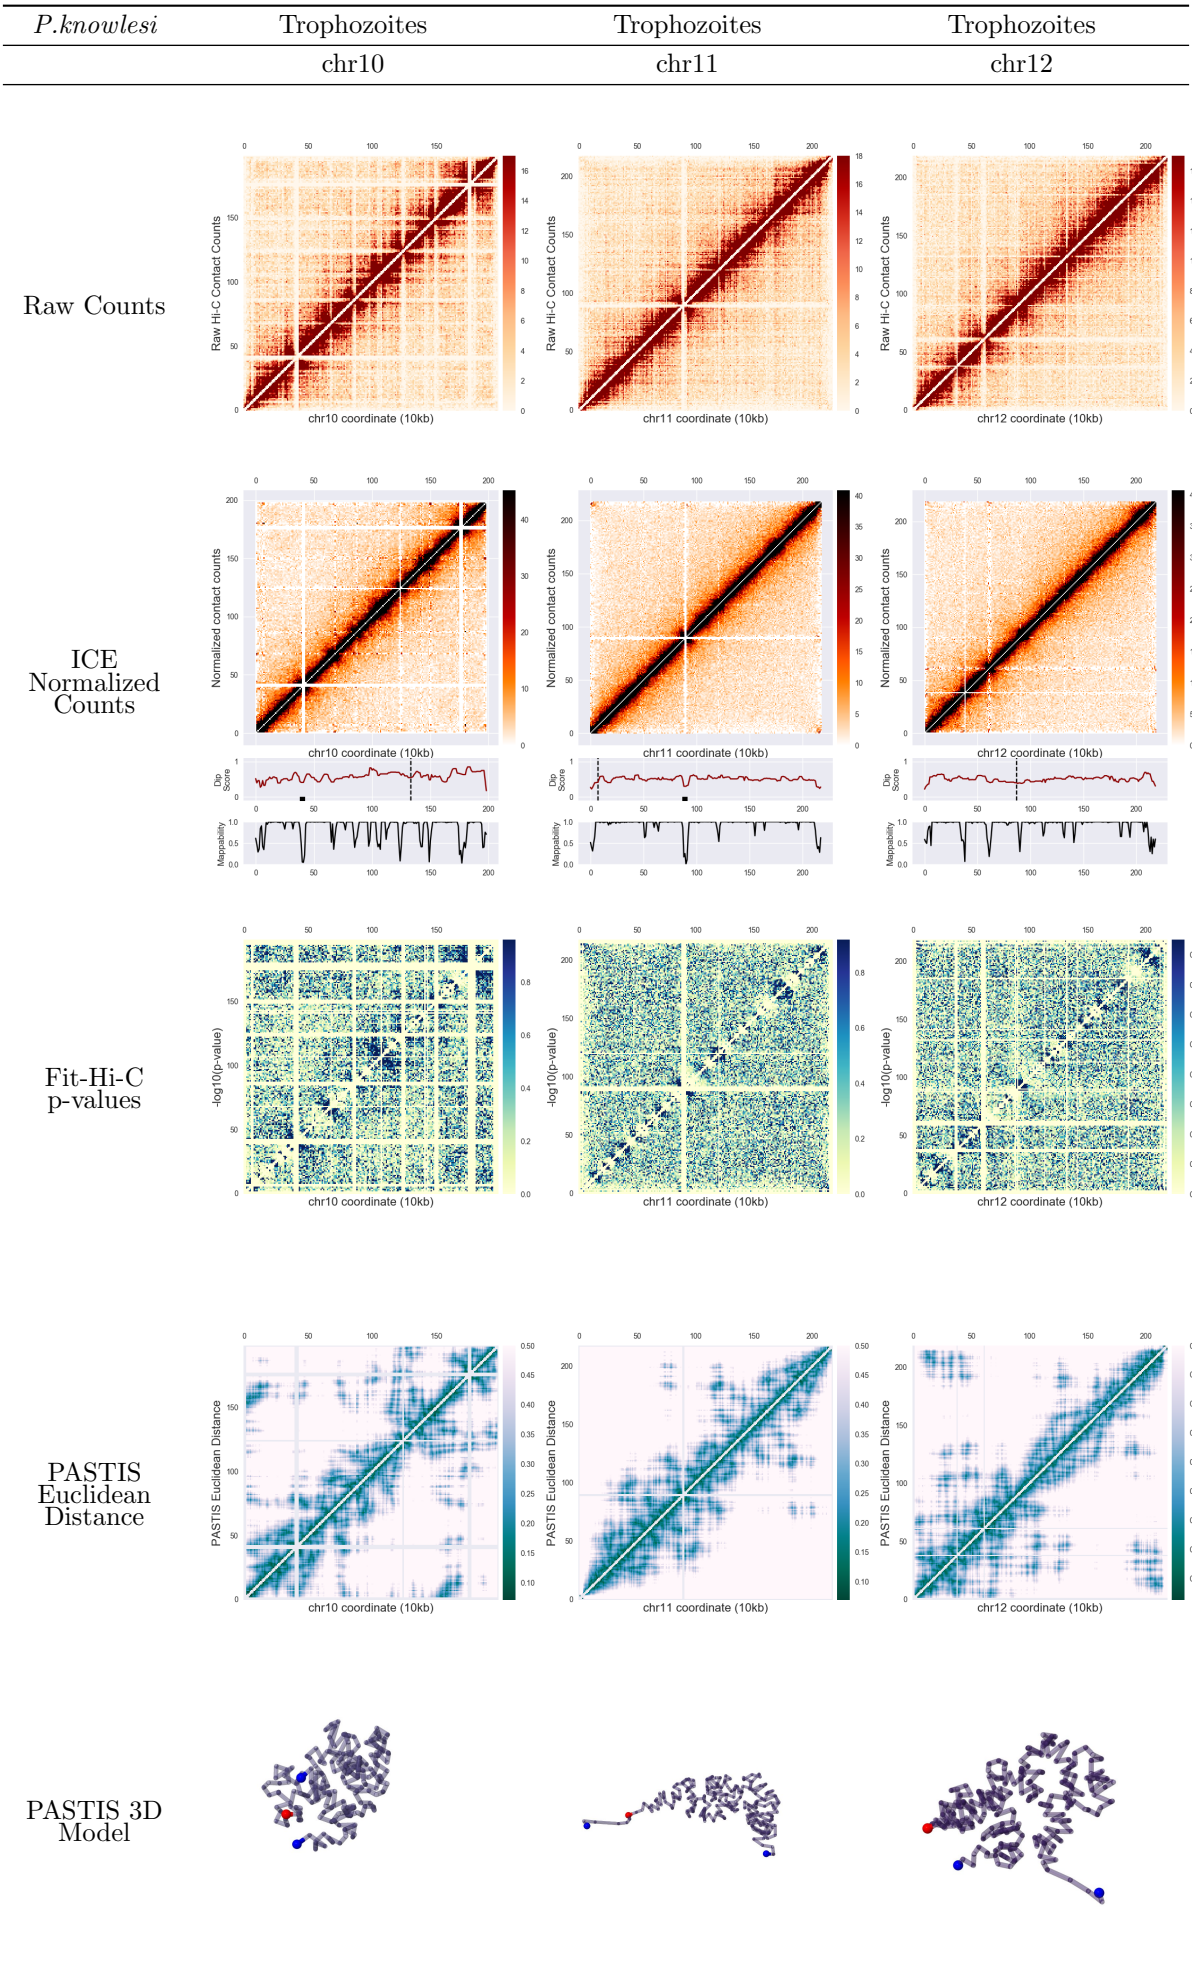

Raw Counts

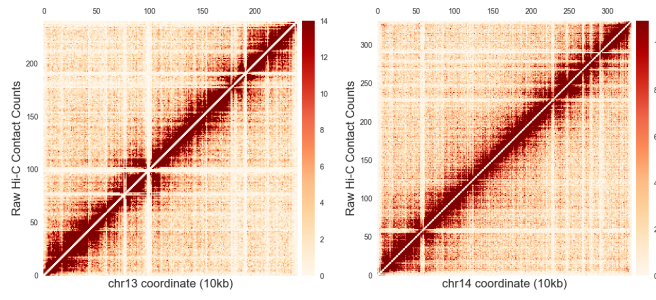

ICE Normalized Counts

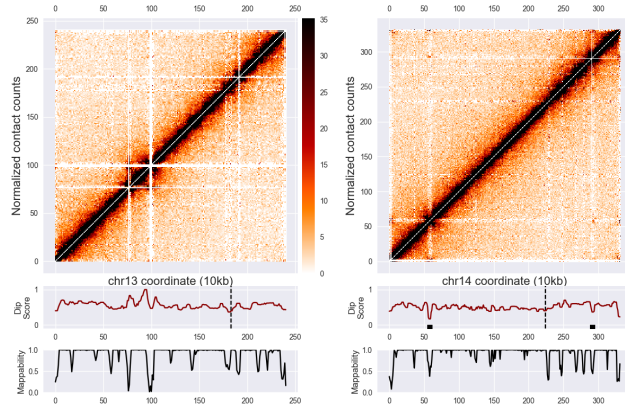

Fit-Hi-C p-values

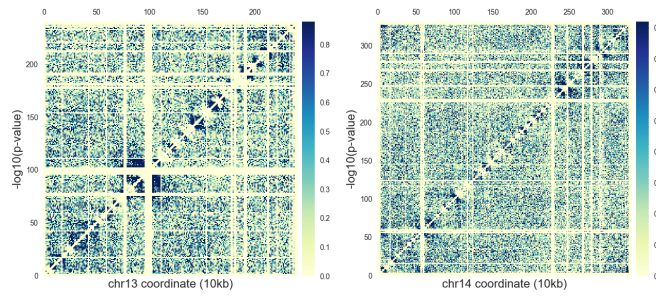

PASTIS Euclidean Distance

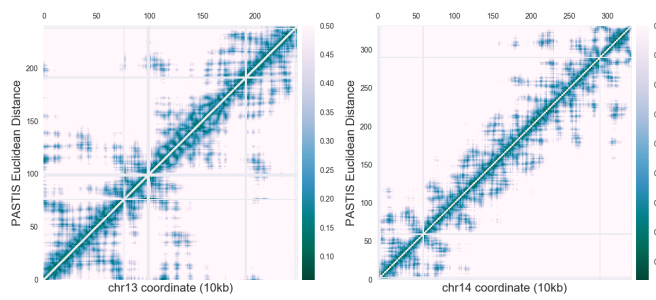

PASTIS 3D Model

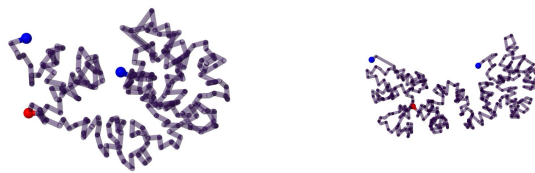



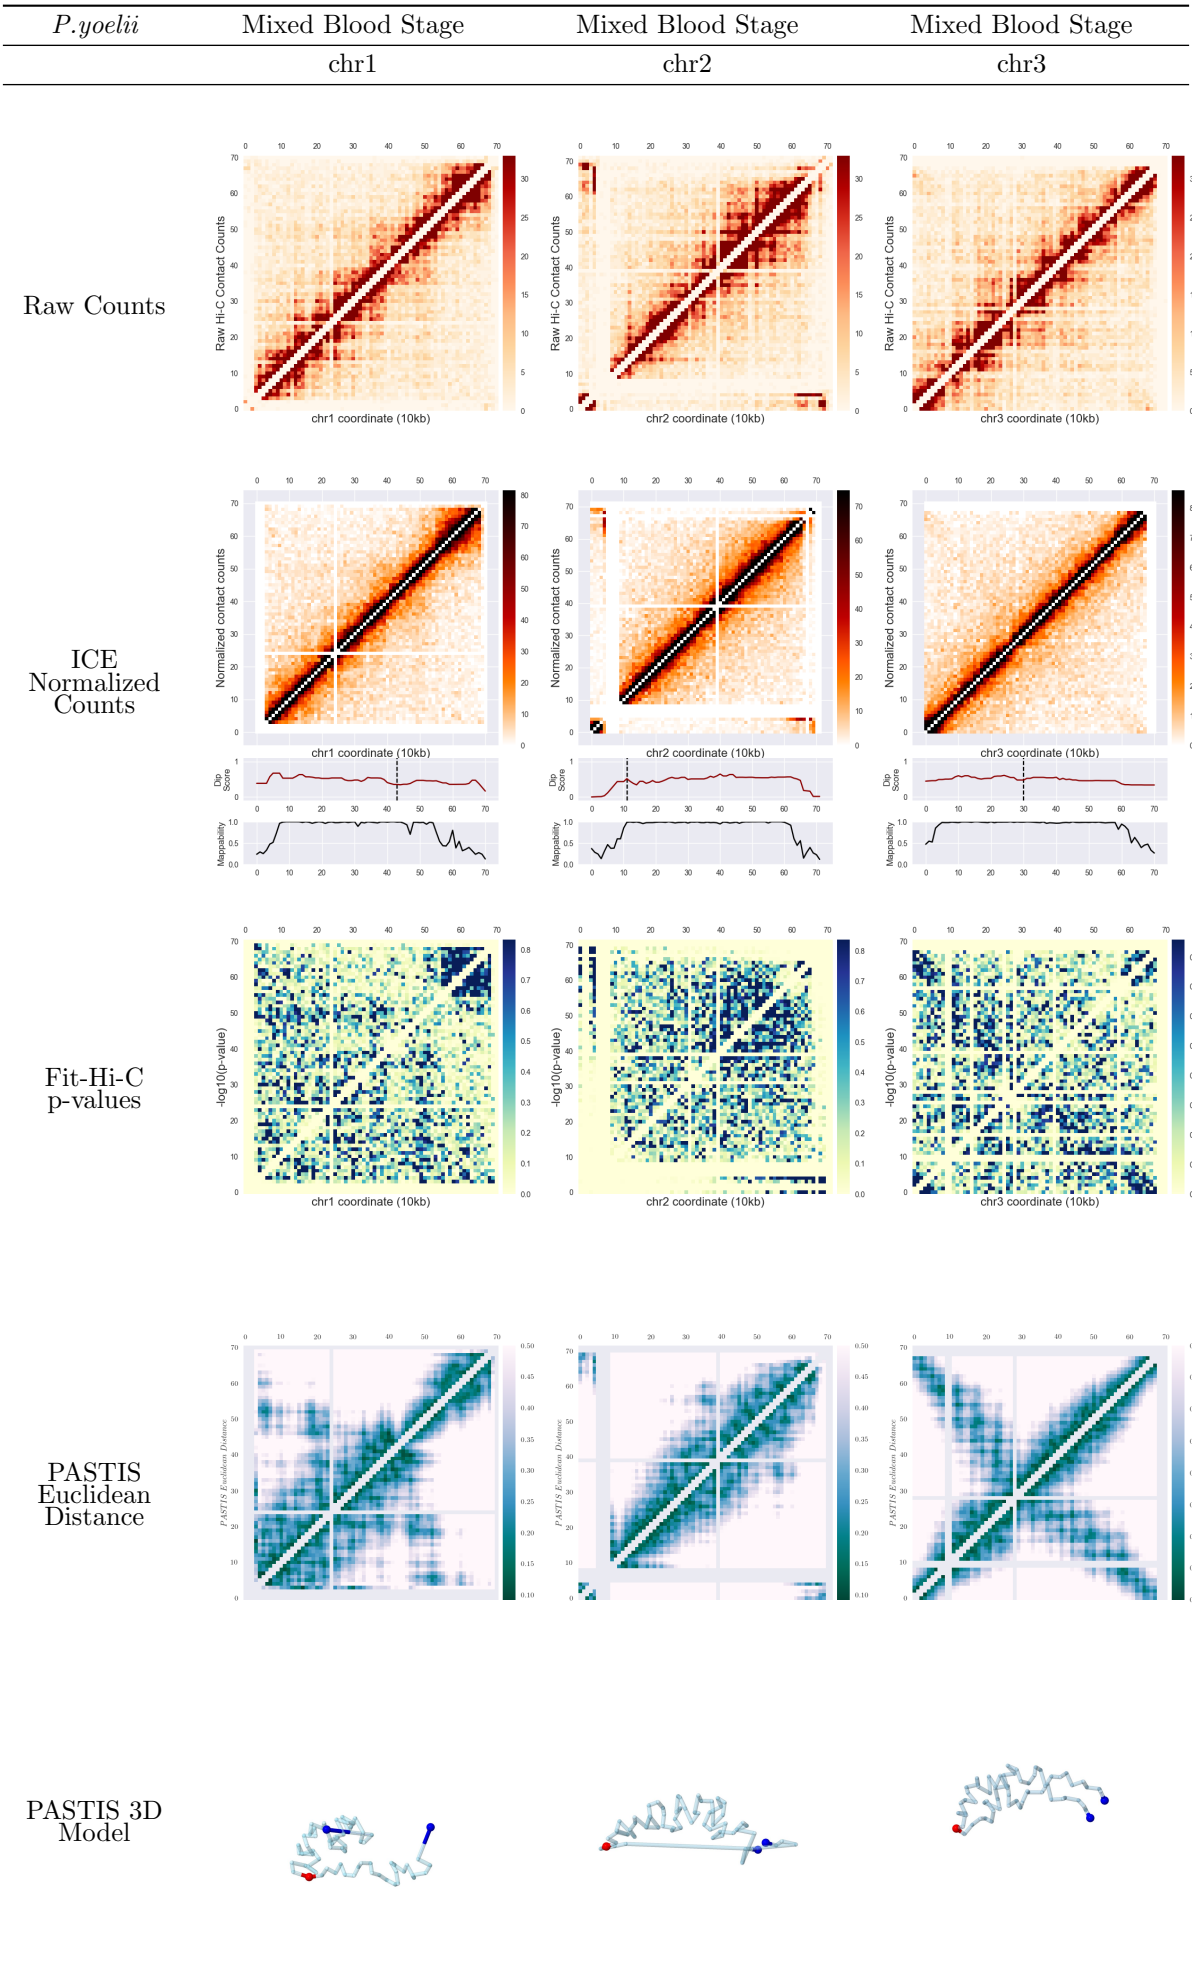

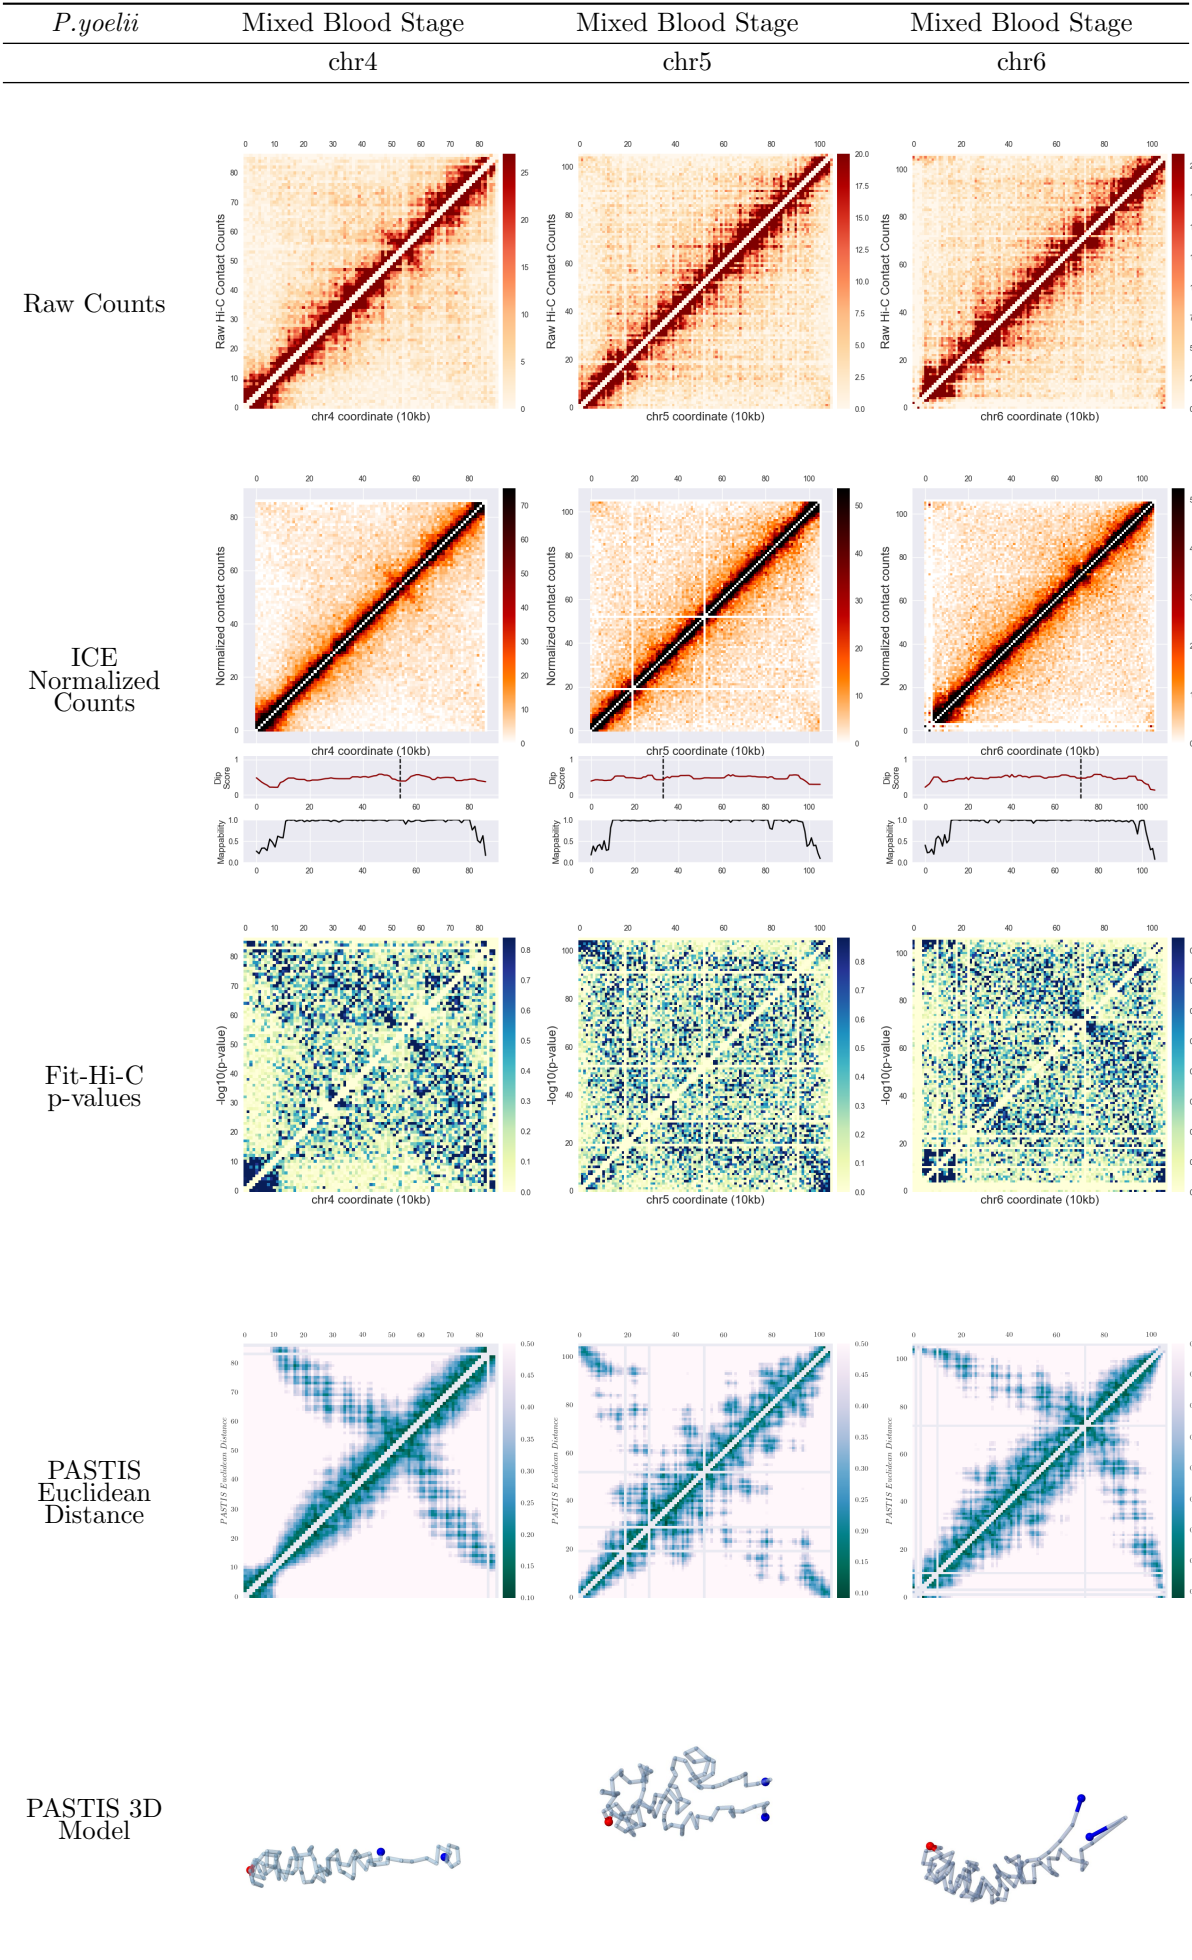

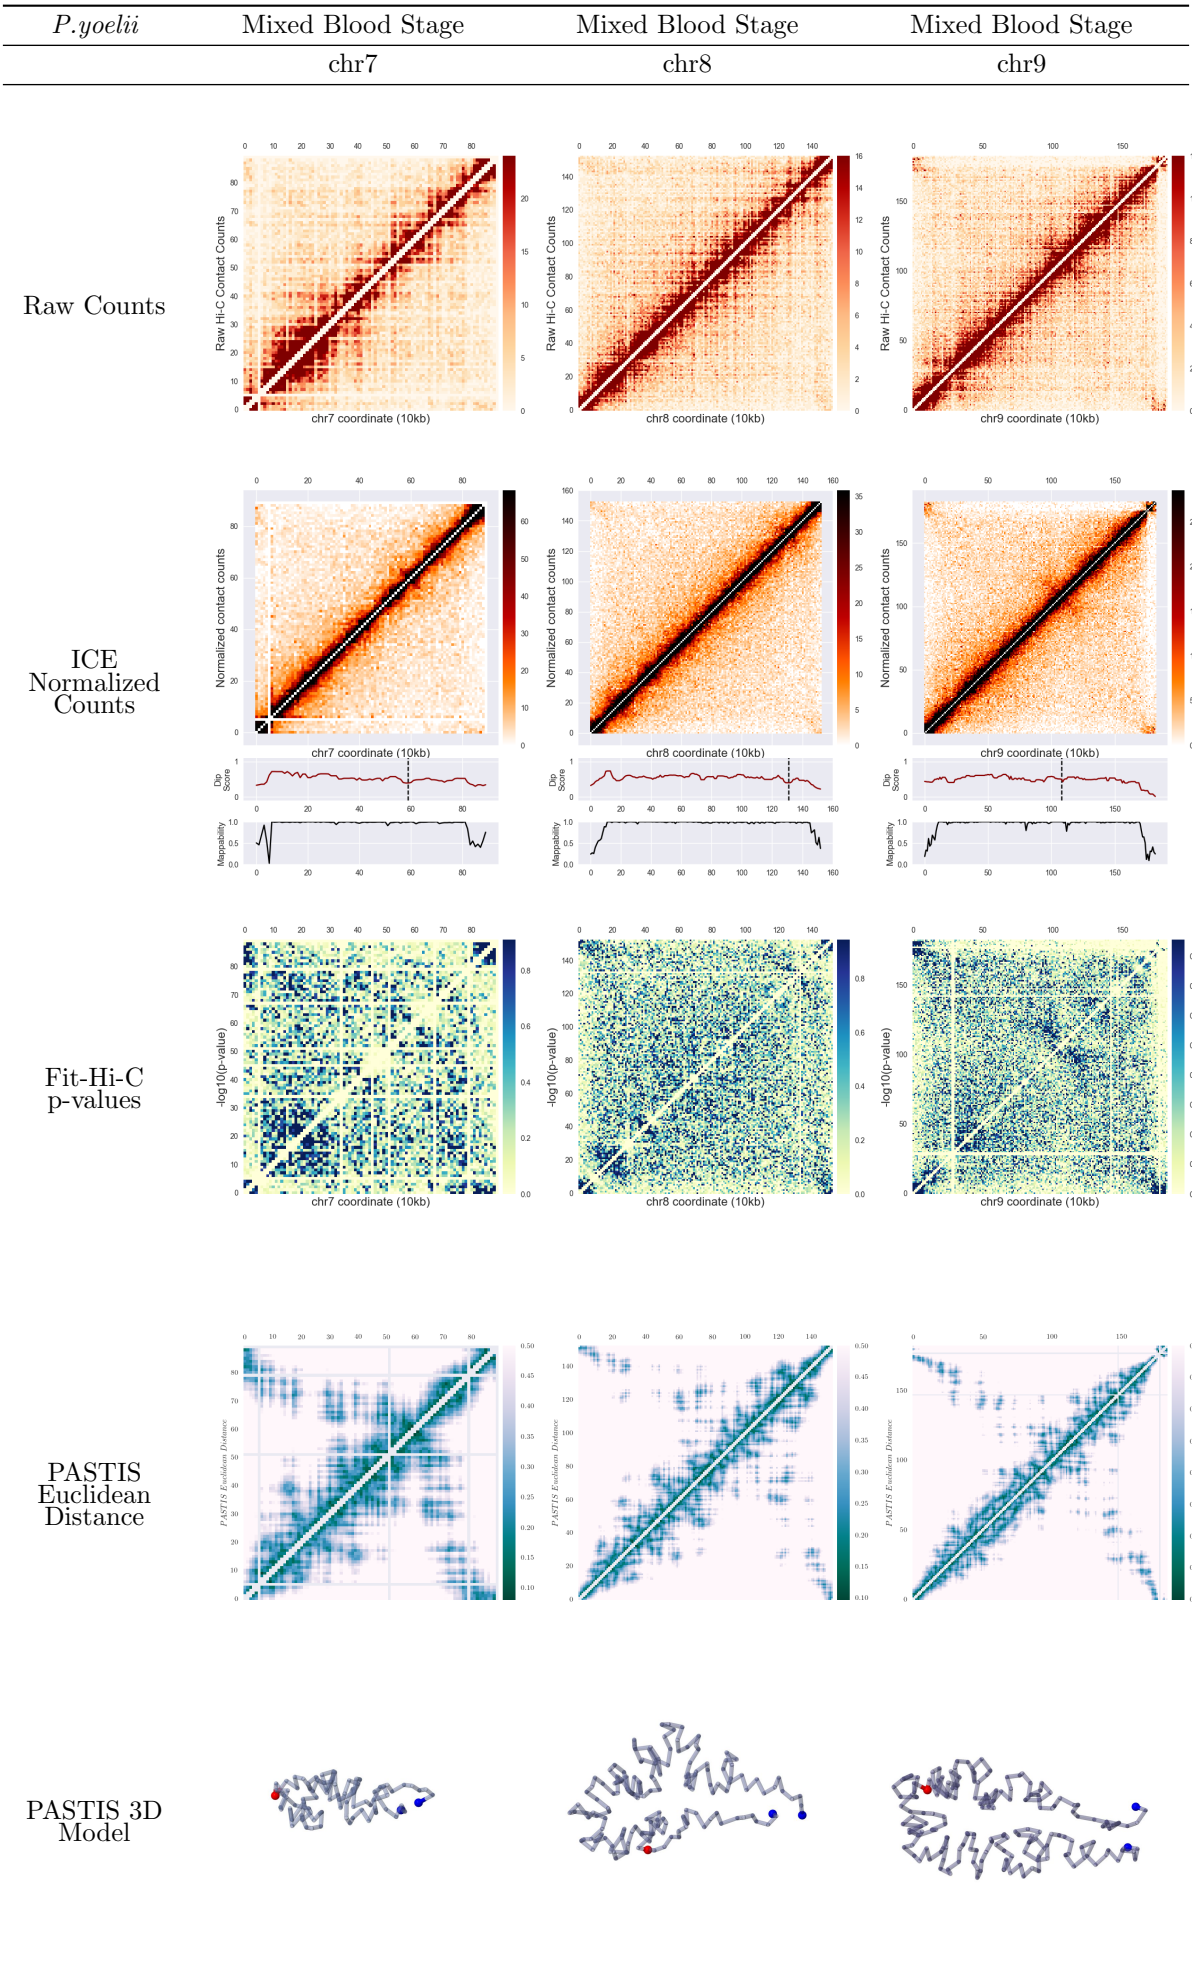

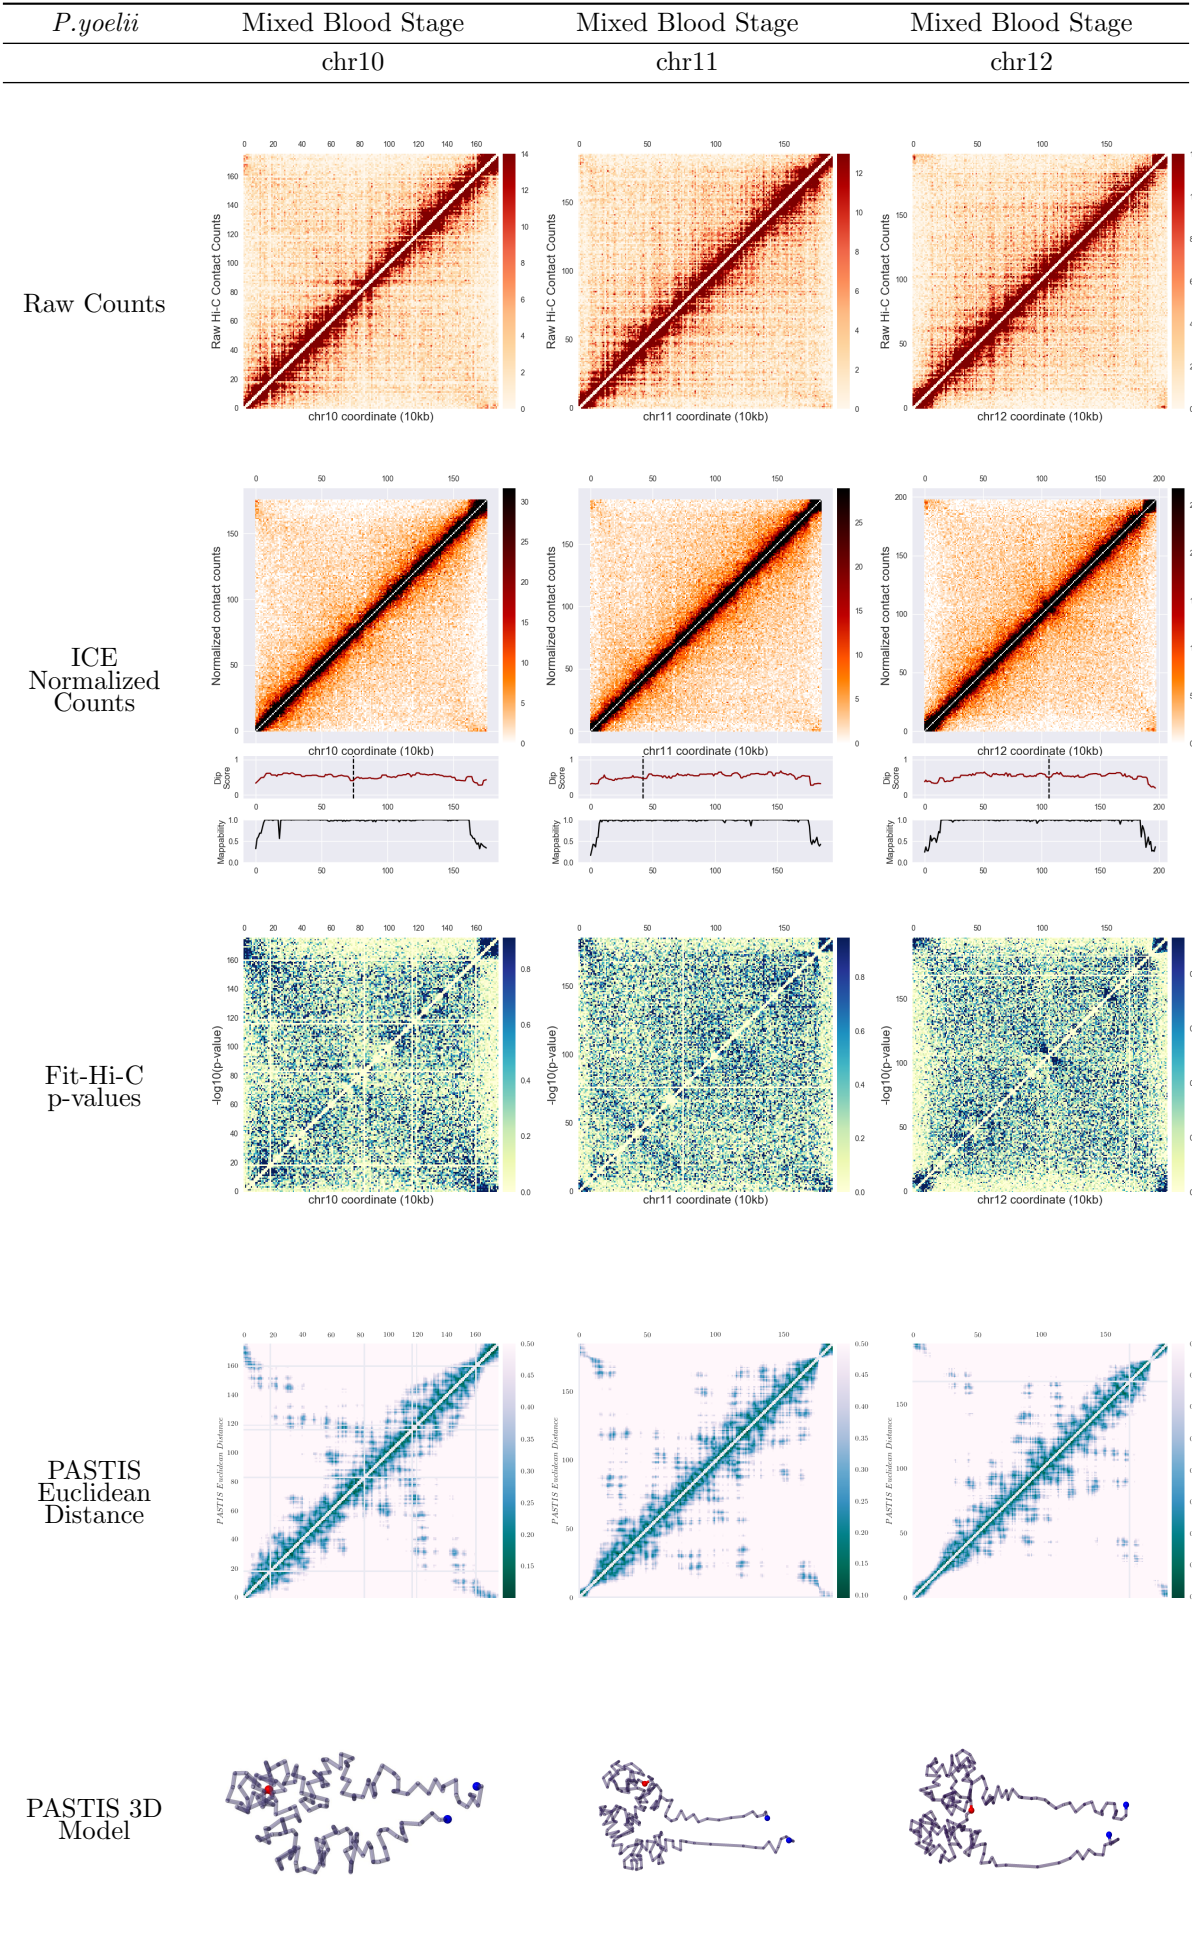

Raw Counts

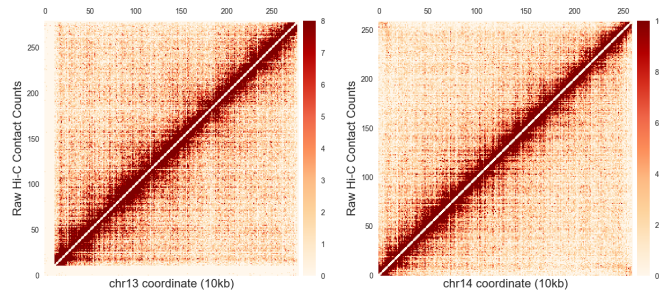

ICE Normalized Counts

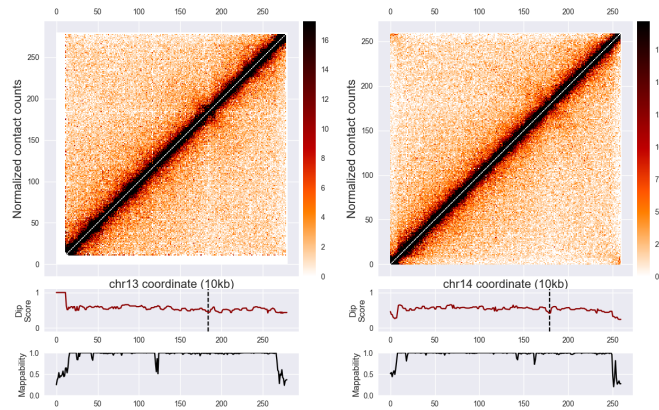

Fit-Hi-C p-values

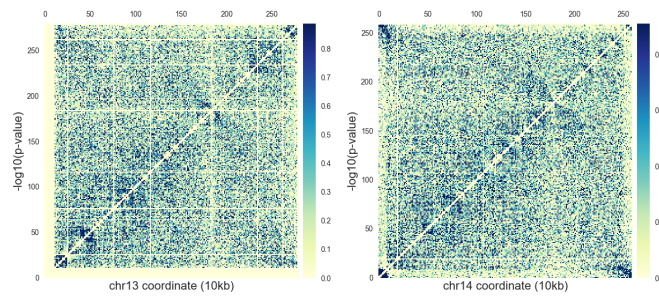

PASTIS Euclidean Distance

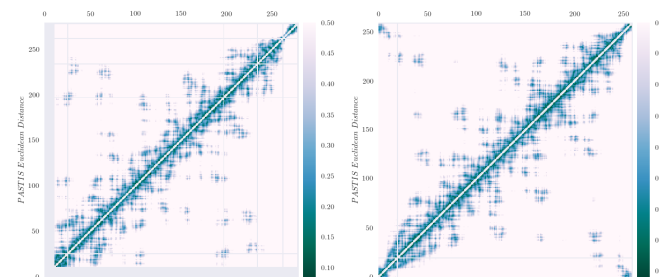

PASTIS 3D Model

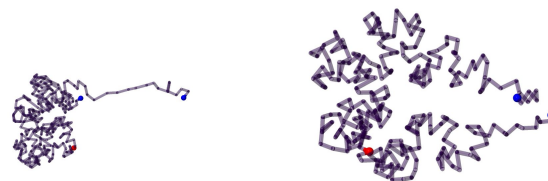

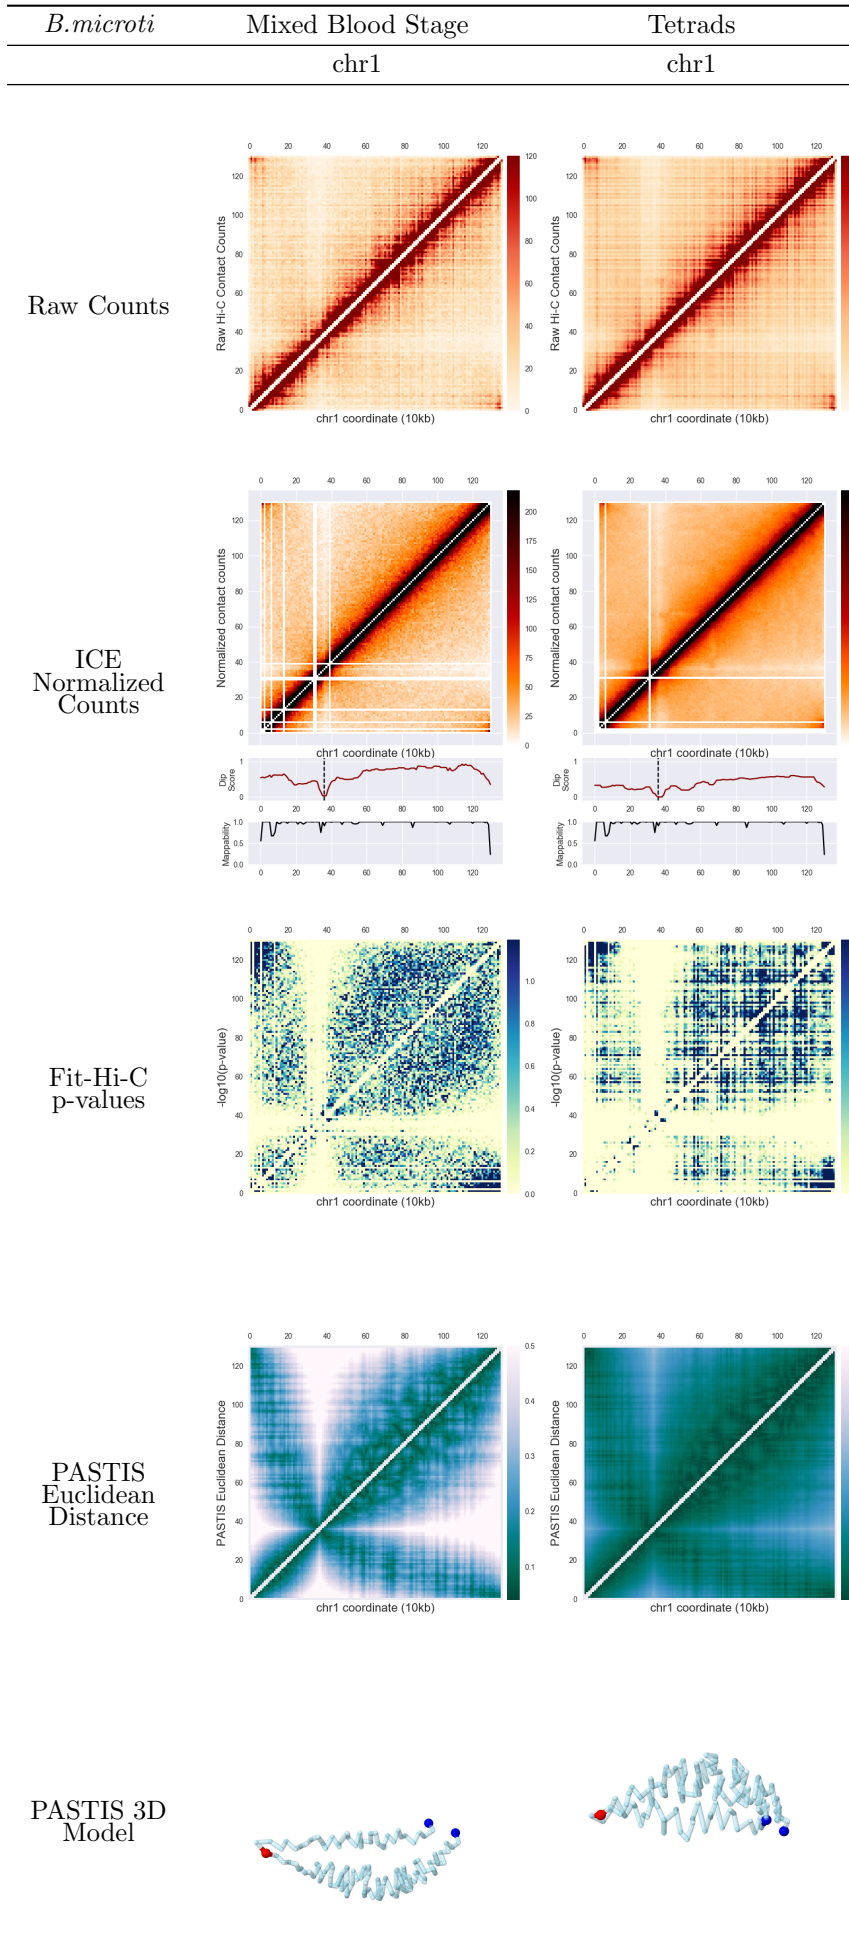

Raw Counts

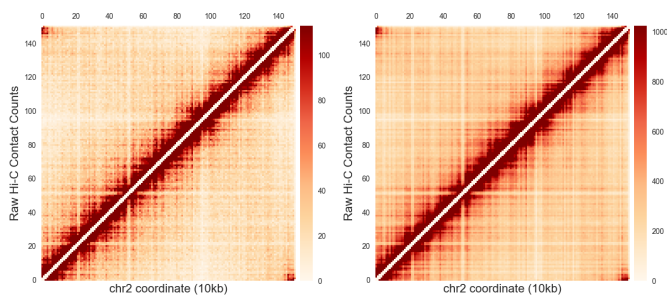

ICE Normalized Counts

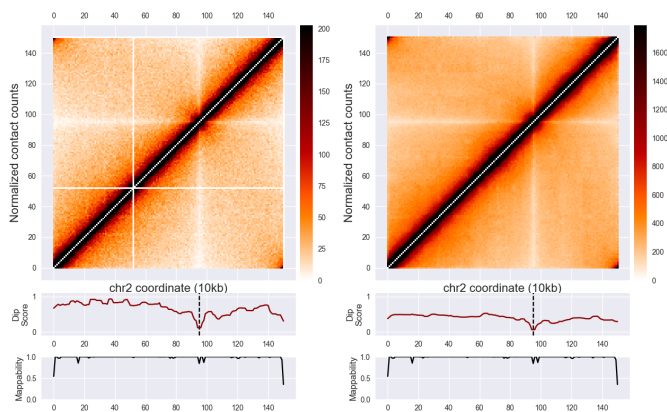

Fit-Hi-C p-values

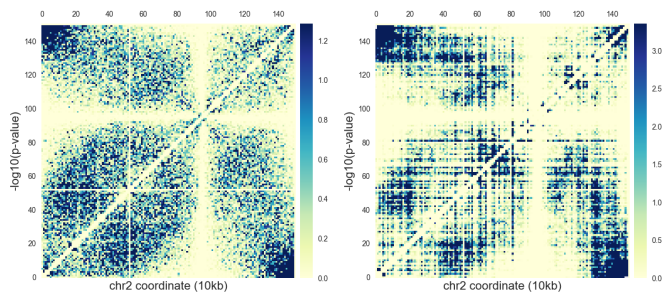

PASTIS Euclidean Distance

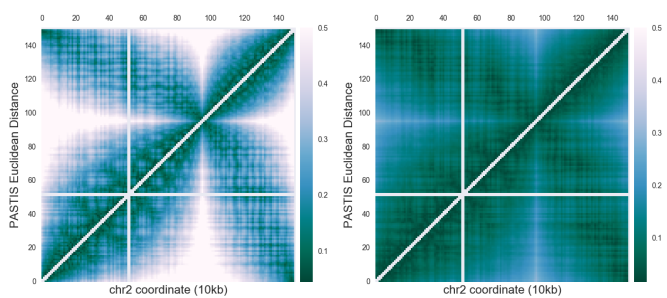

PASTIS 3D Model

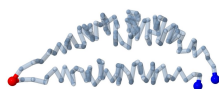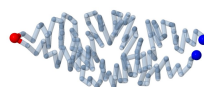

Raw Counts

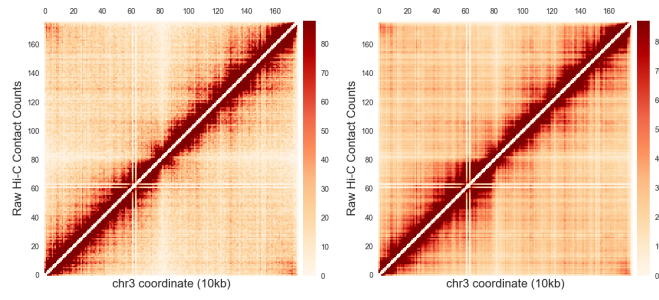

ICE Normalized Counts

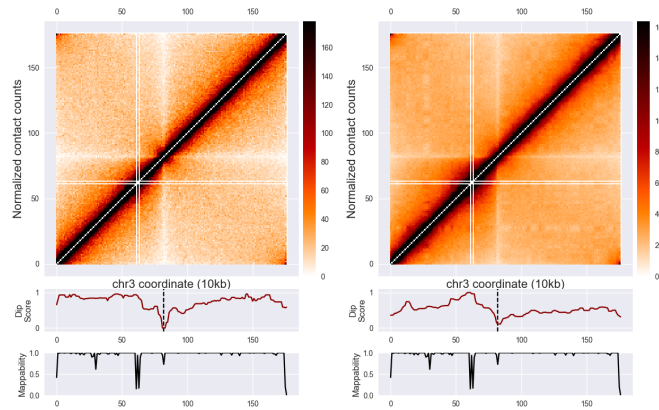

Fit-Hi-C p-values

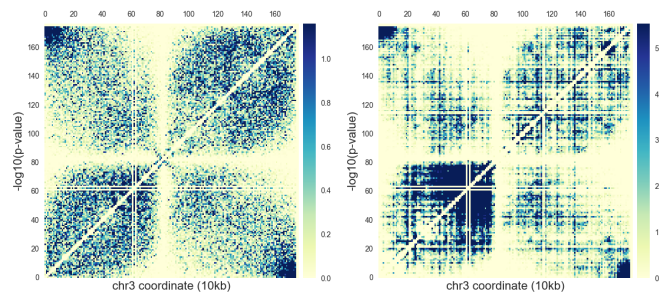

PASTIS Euclidean Distance

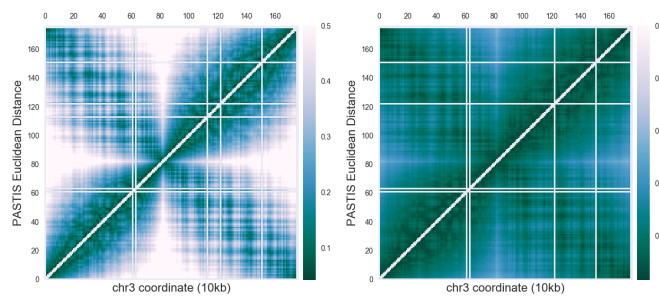

PASTIS 3D Model

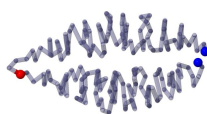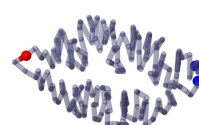



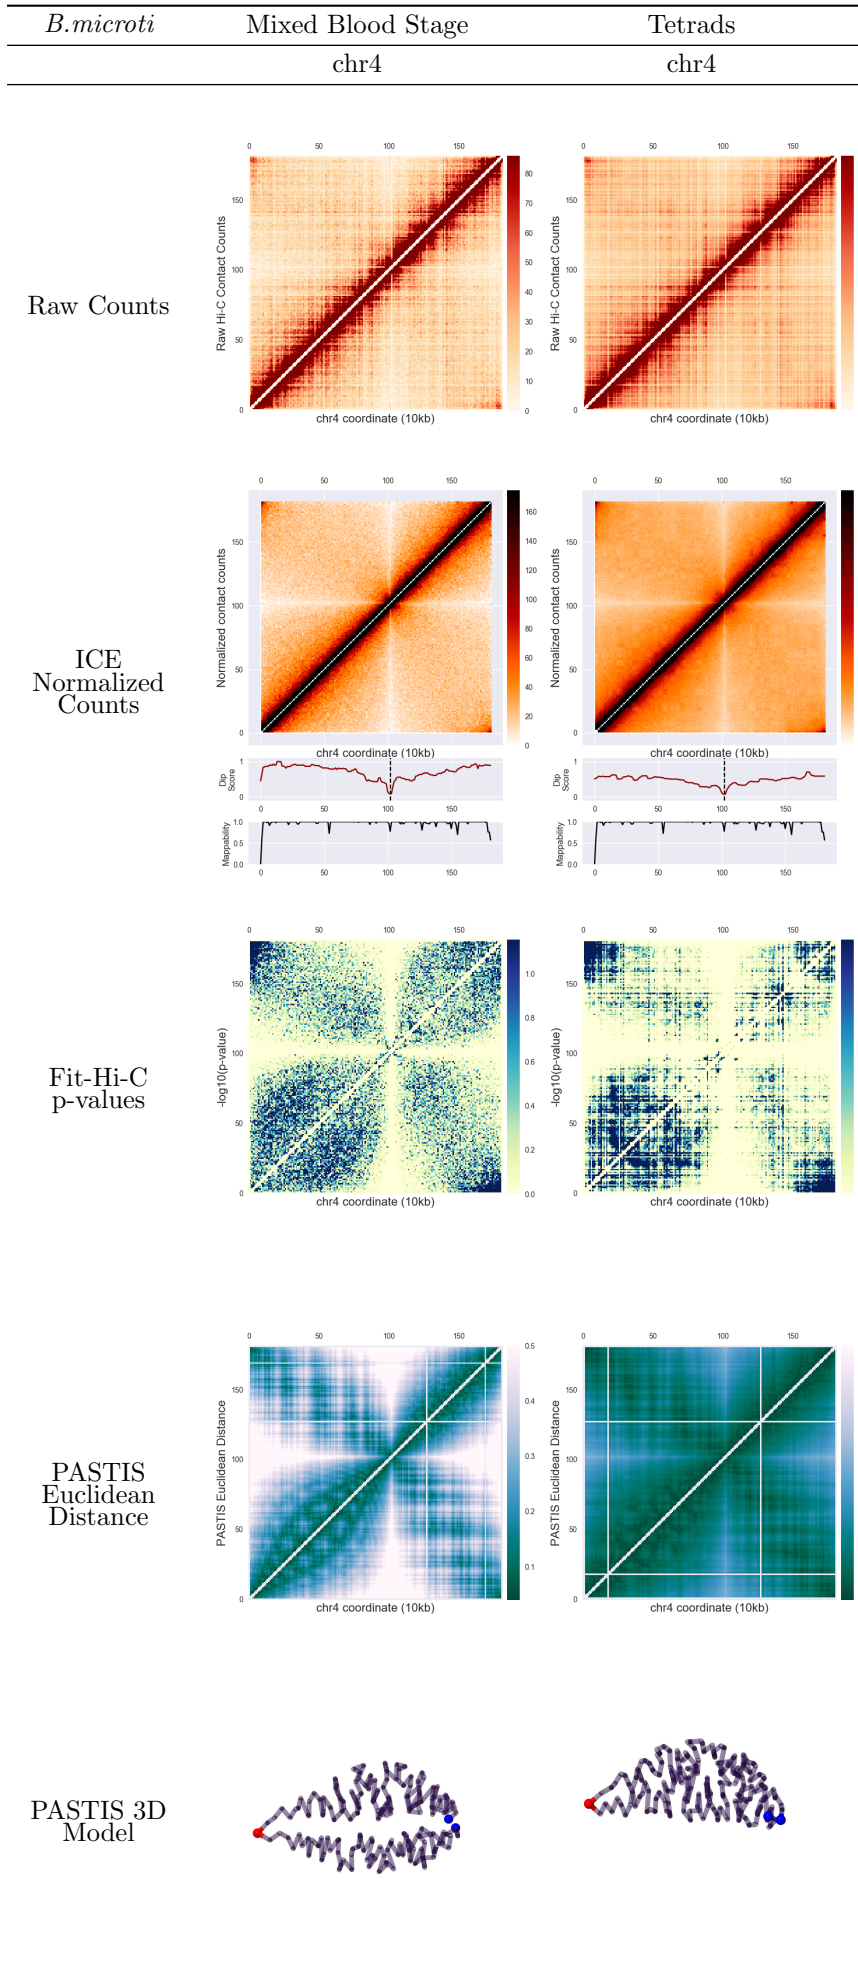

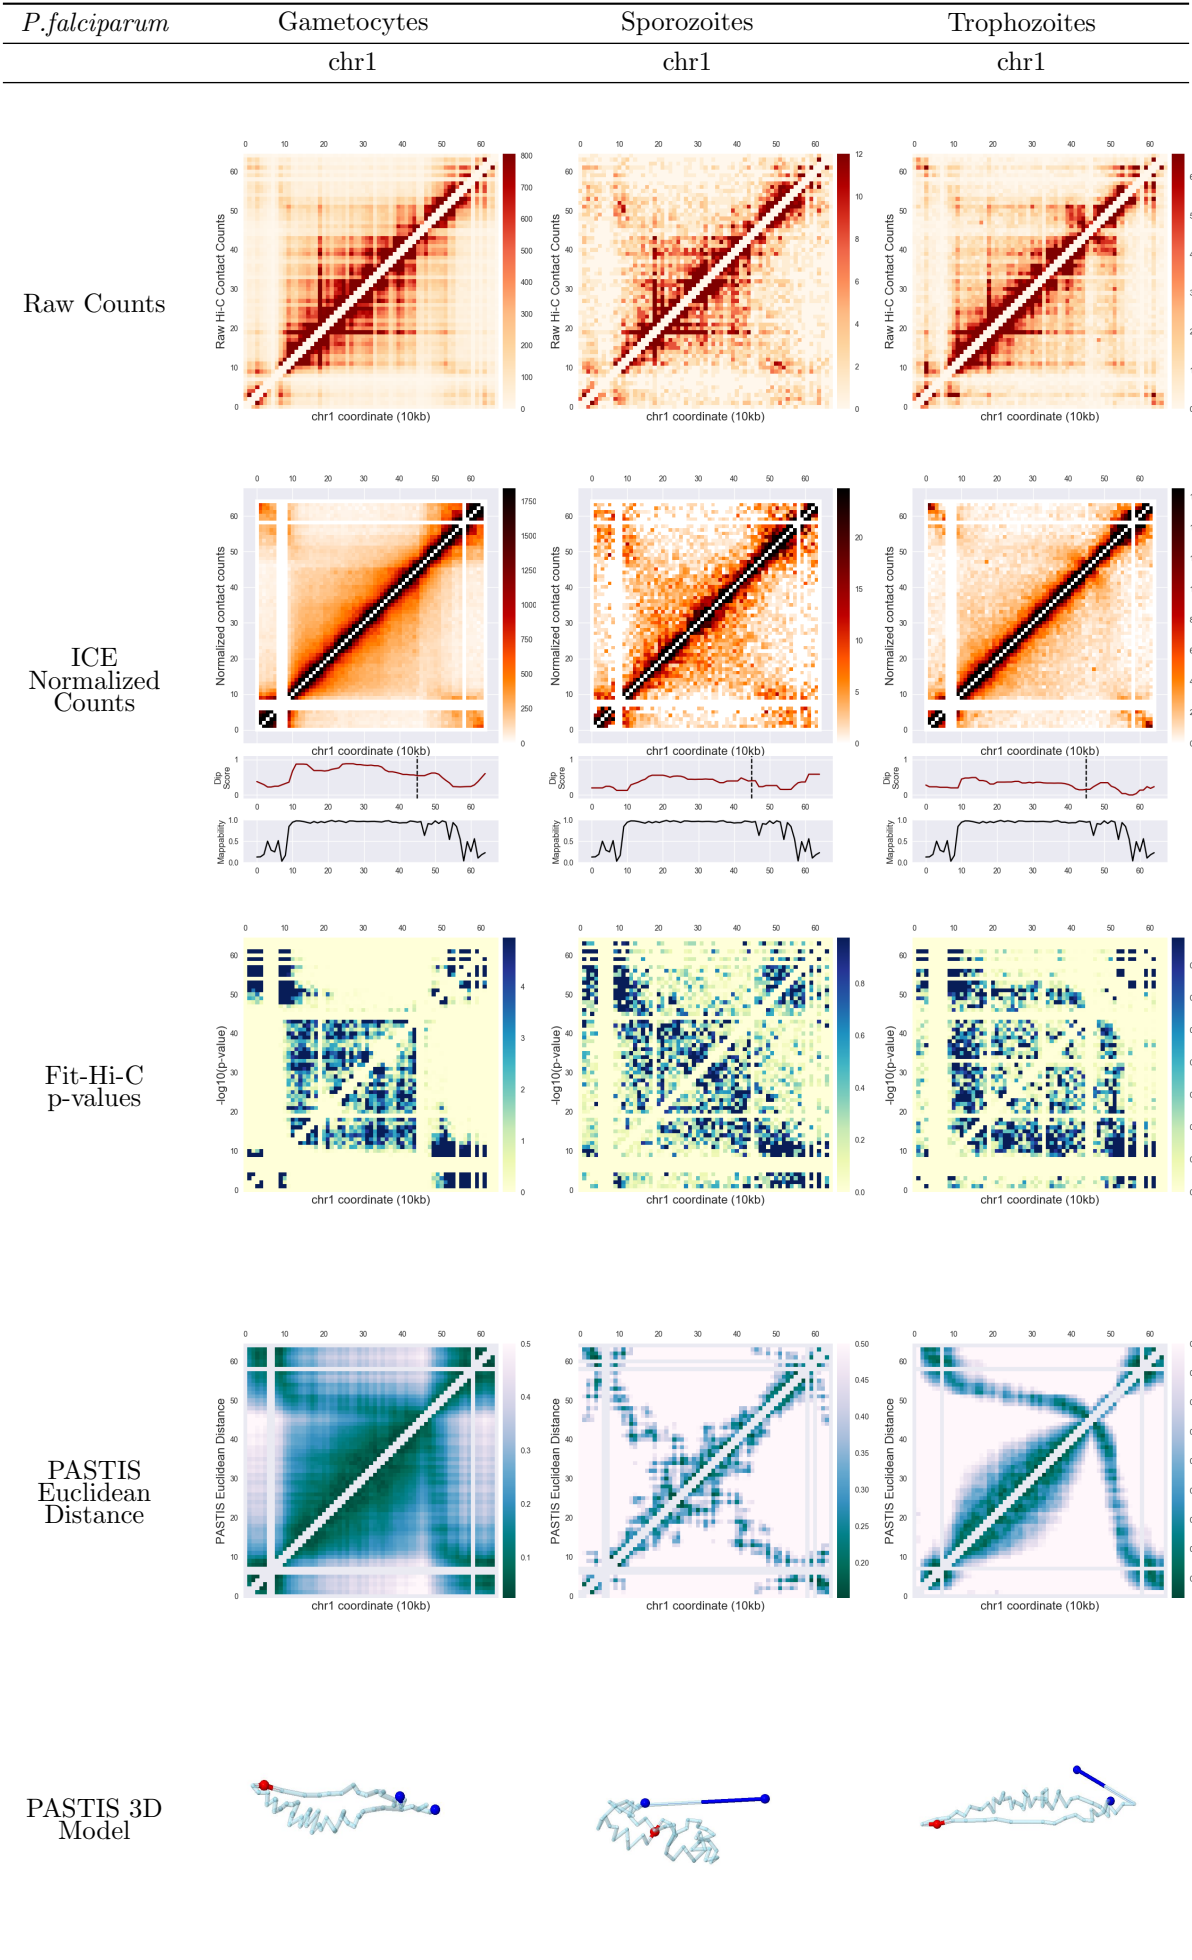

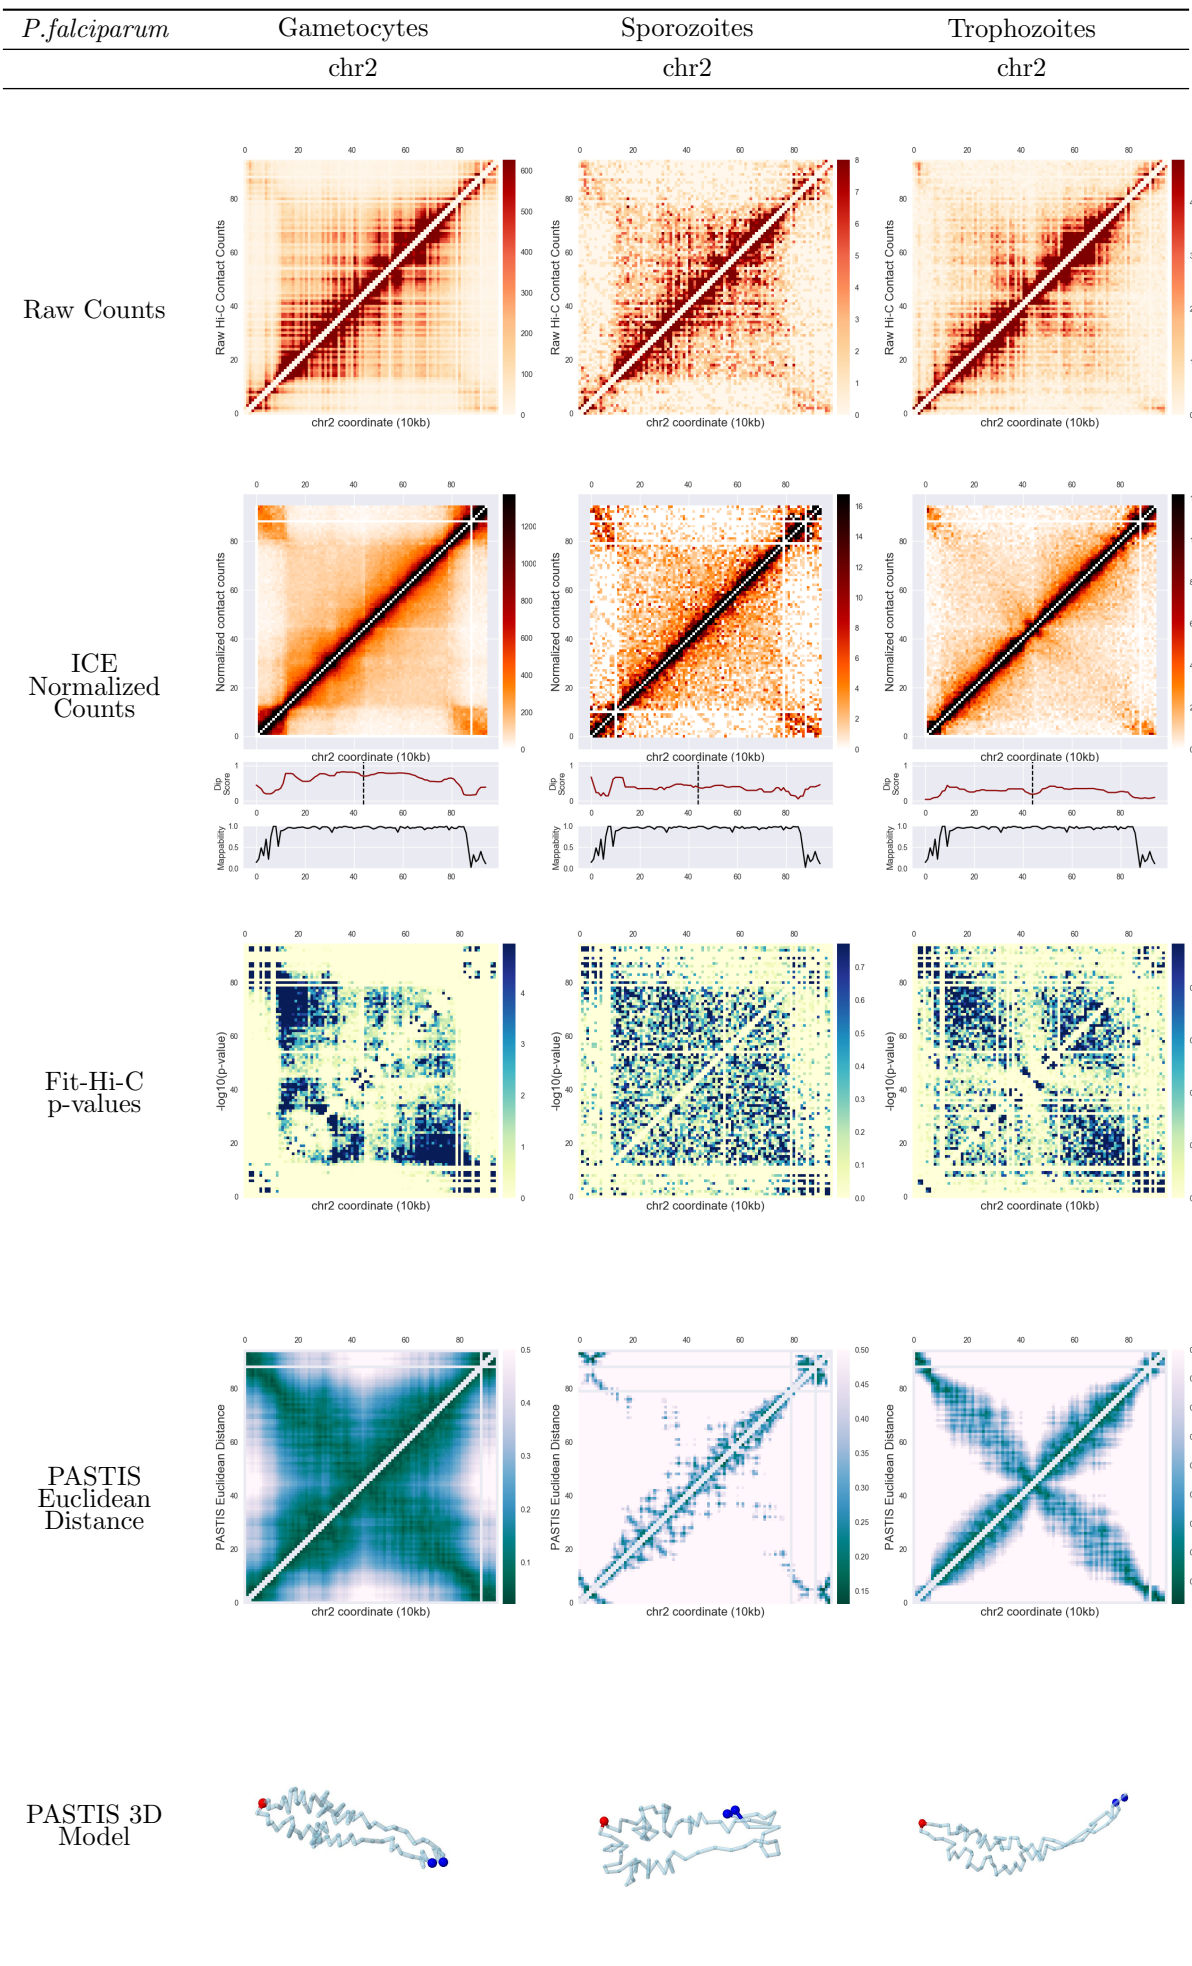

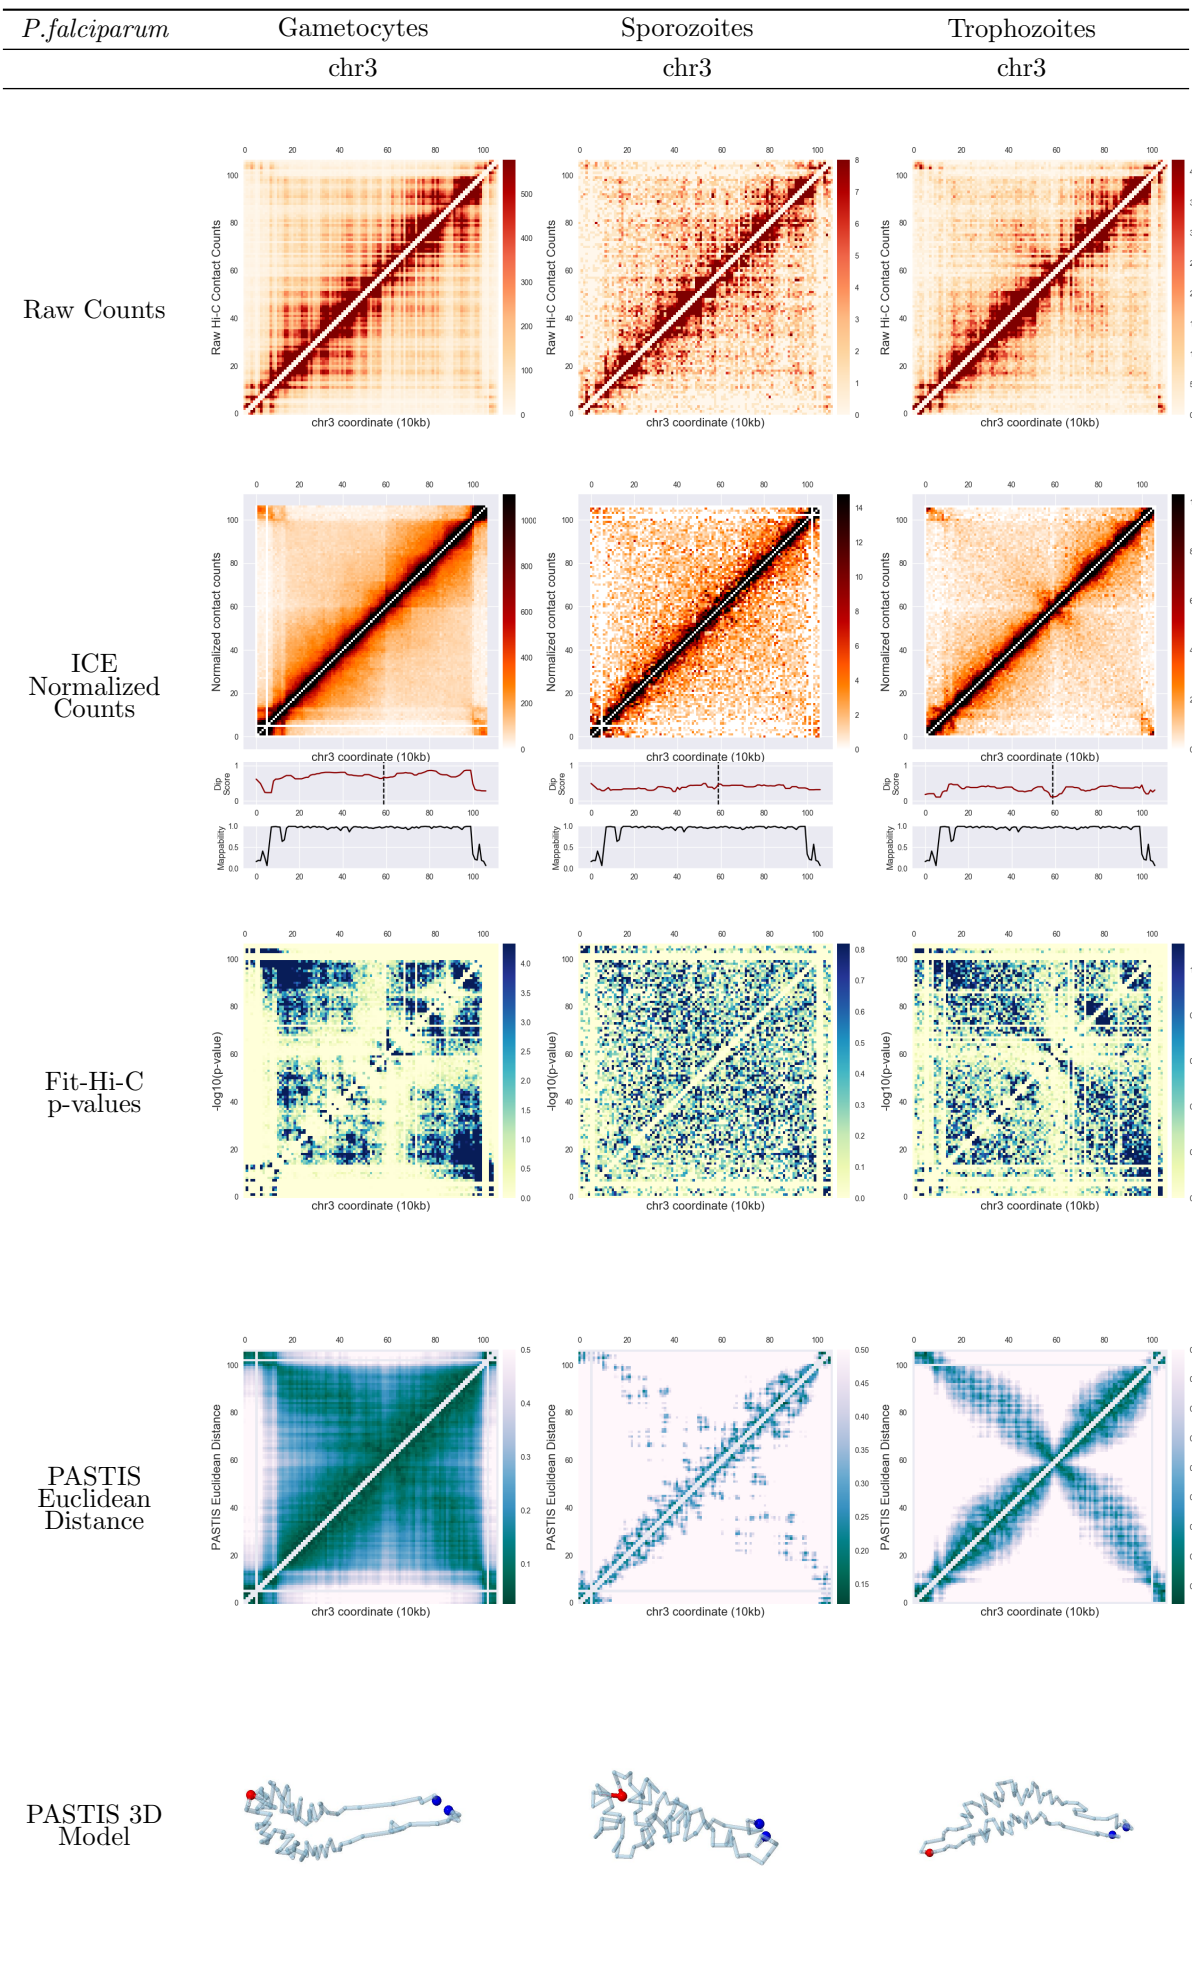

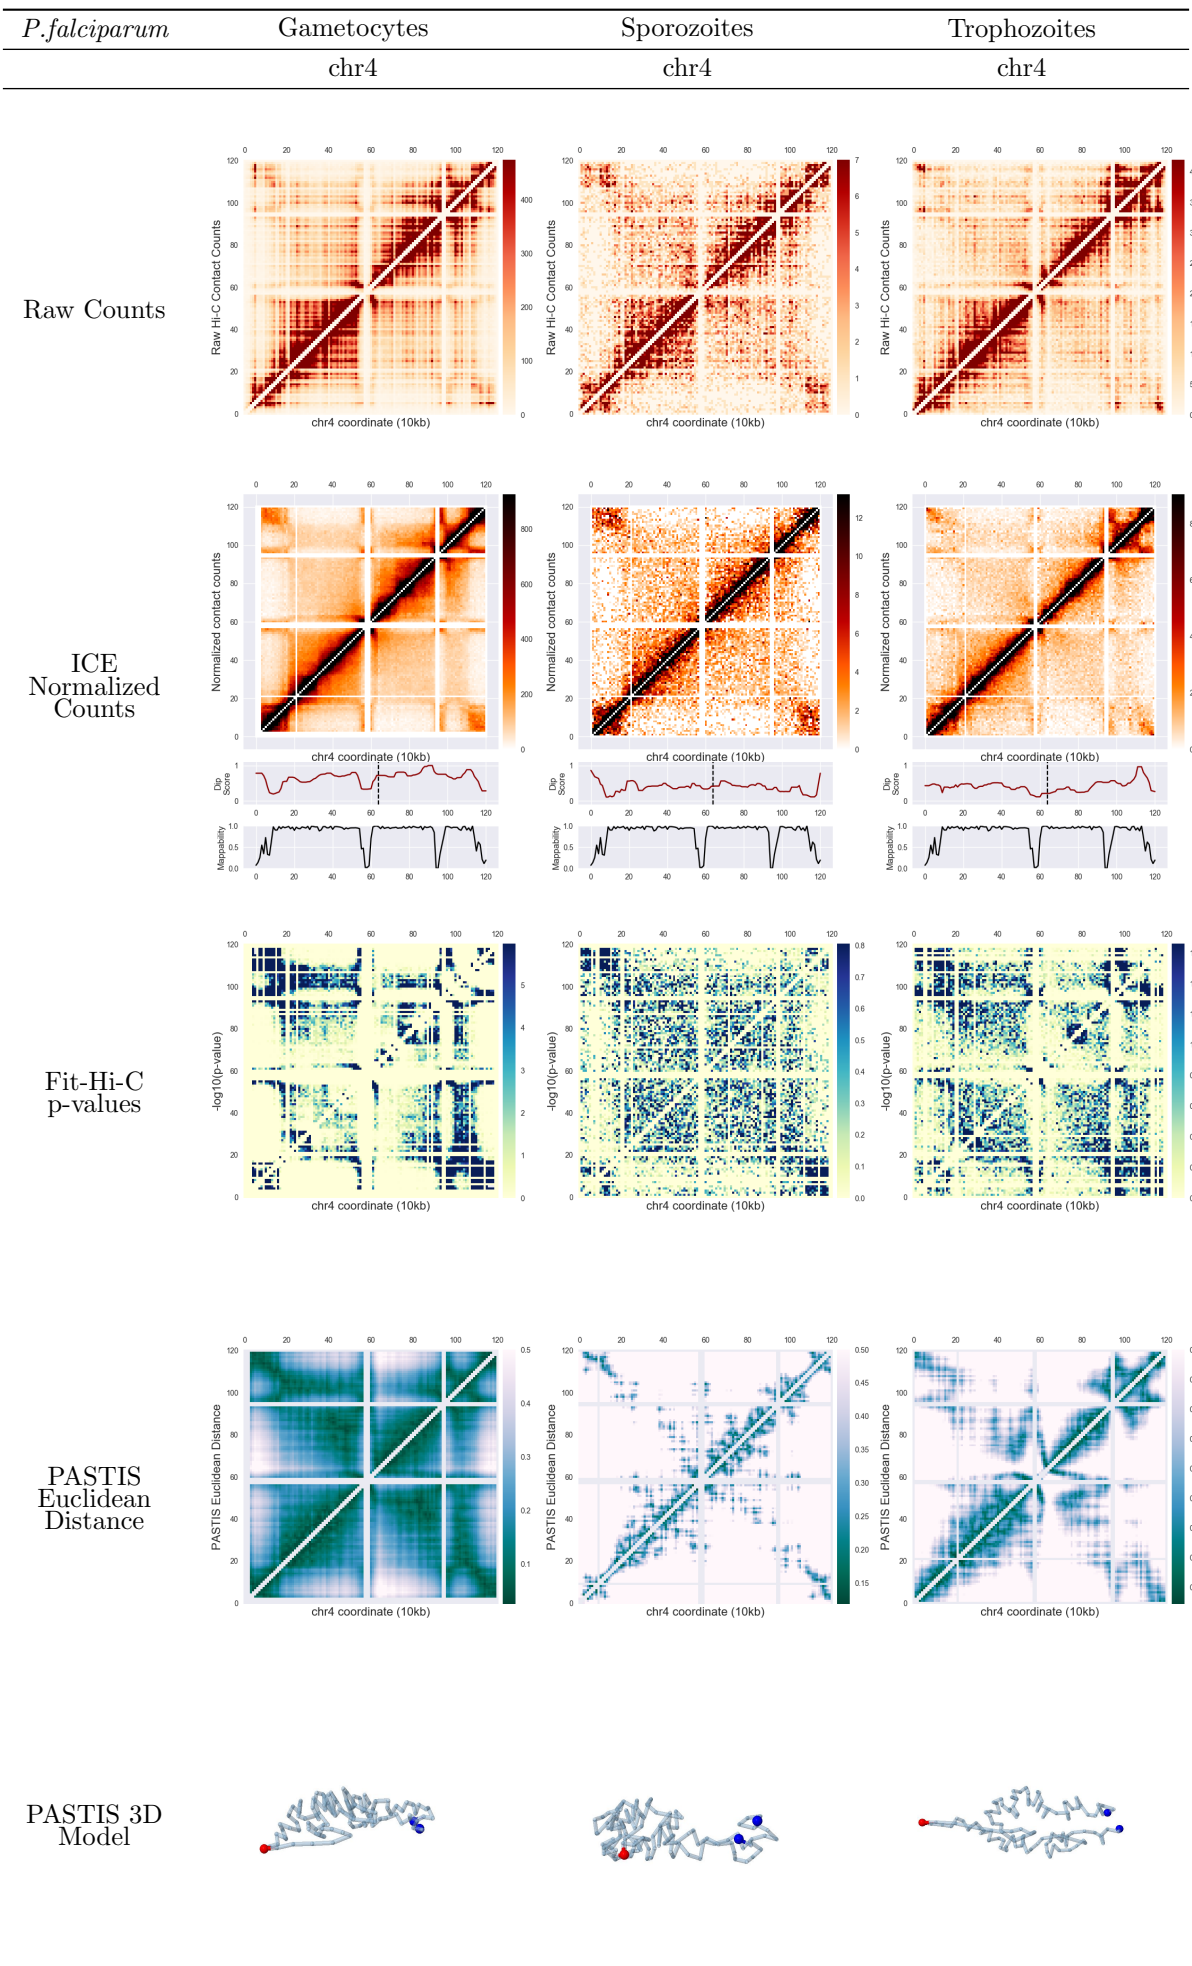

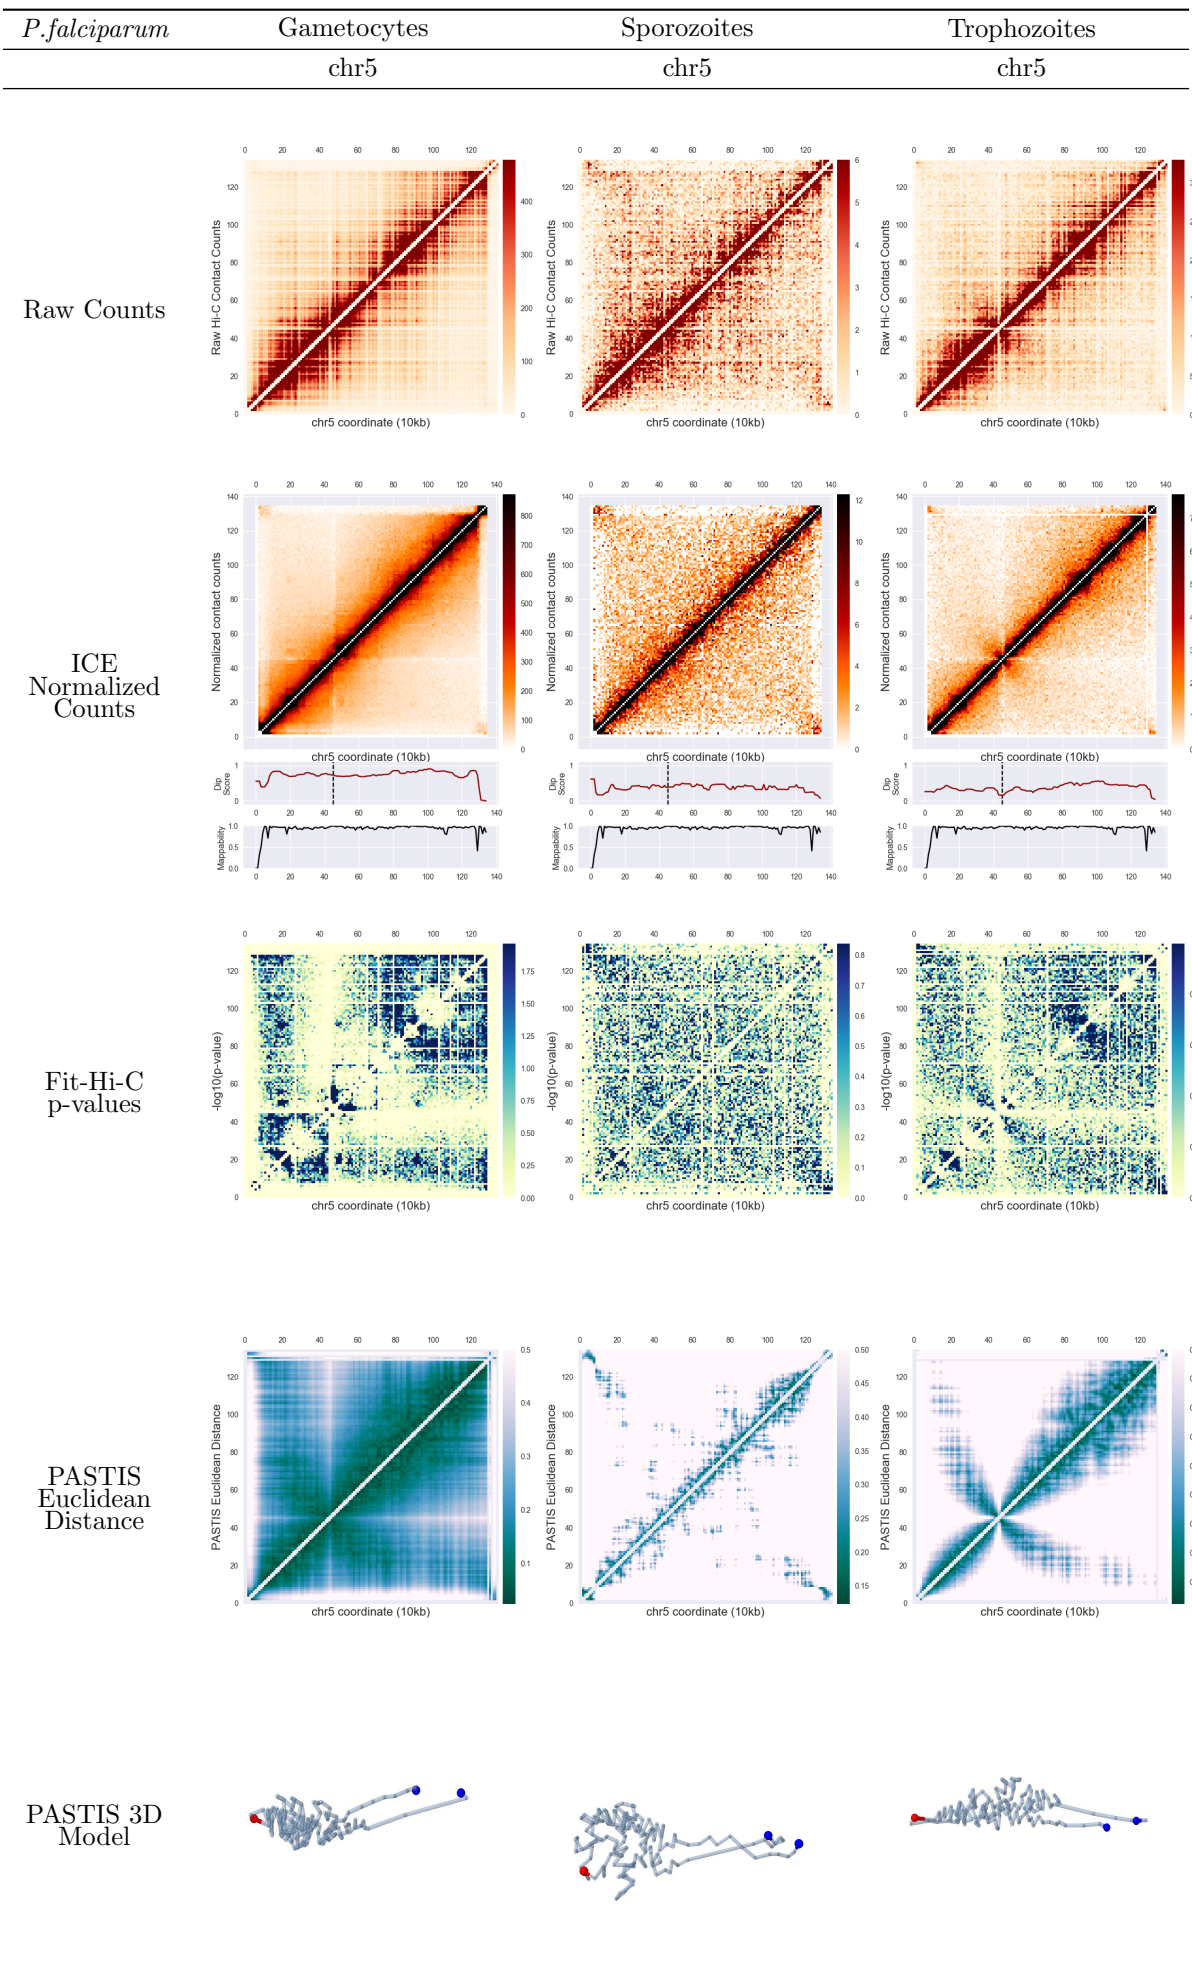

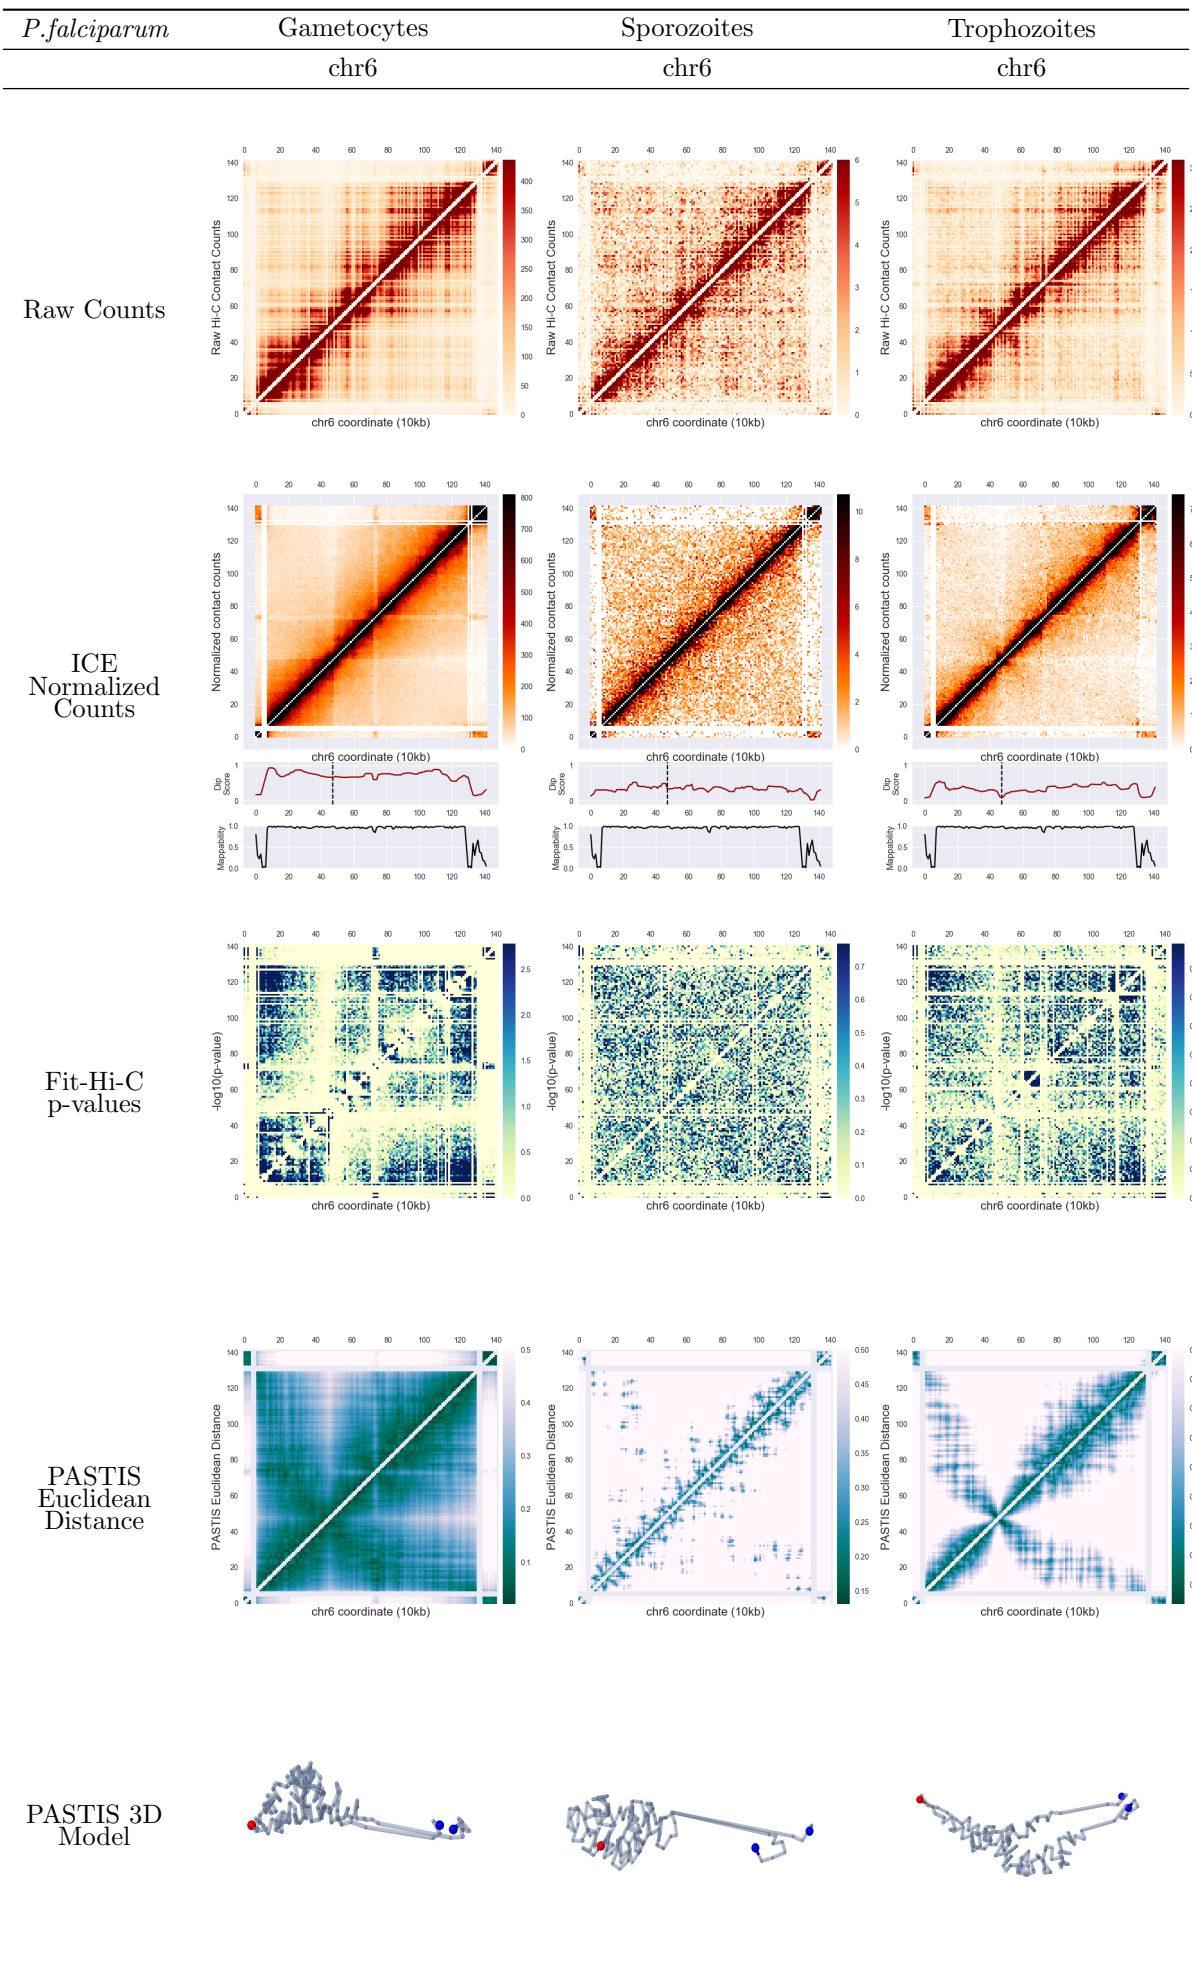

Raw Counts

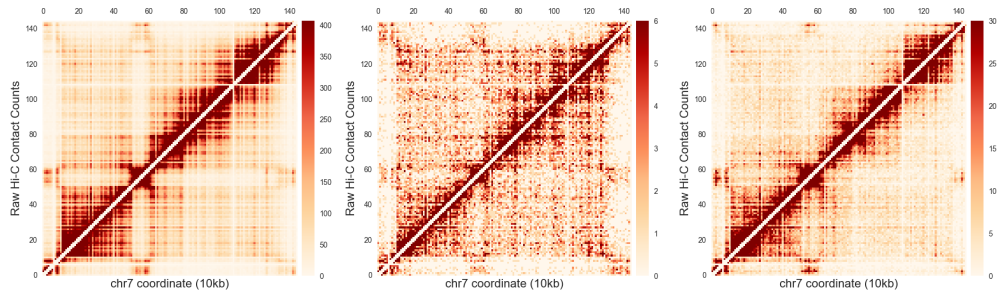

ICE Normalized Counts

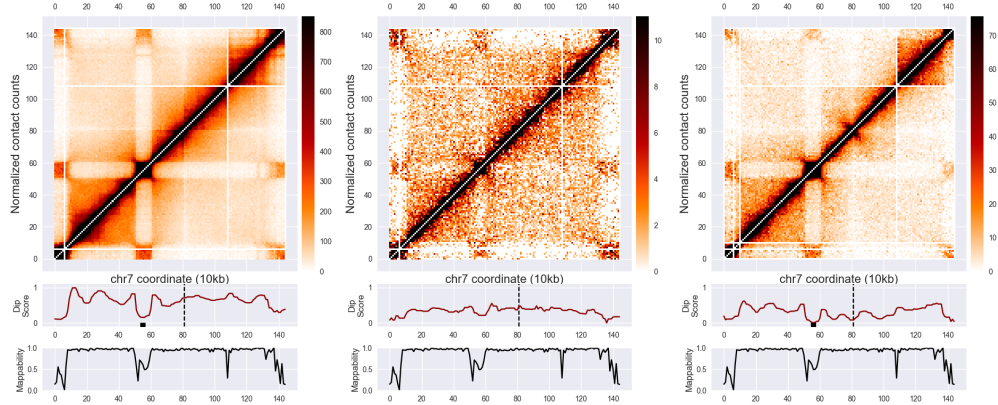

Fit-Hi-C p-values

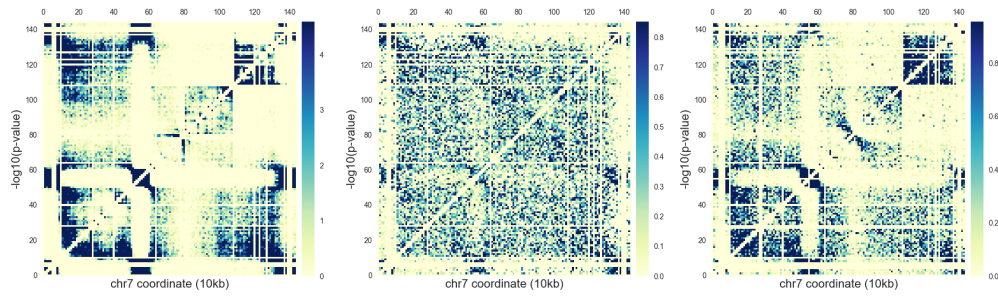

PASTIS Euclidean Distance

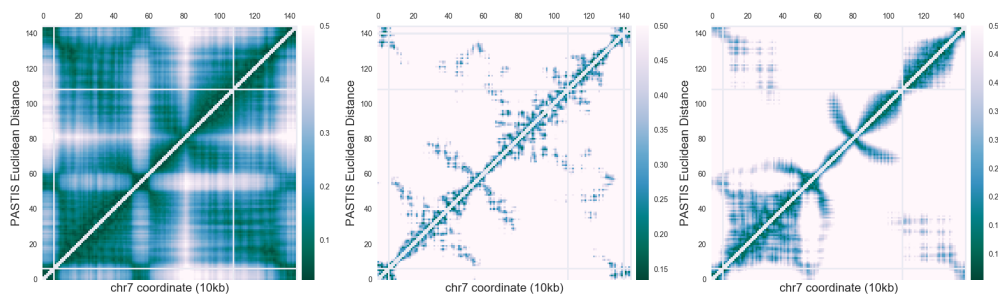

PASTIS 3D Model

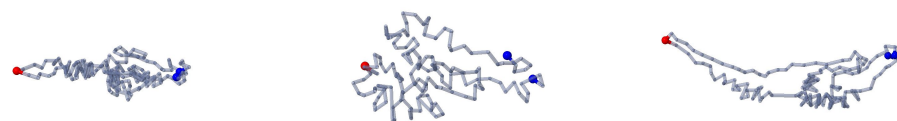



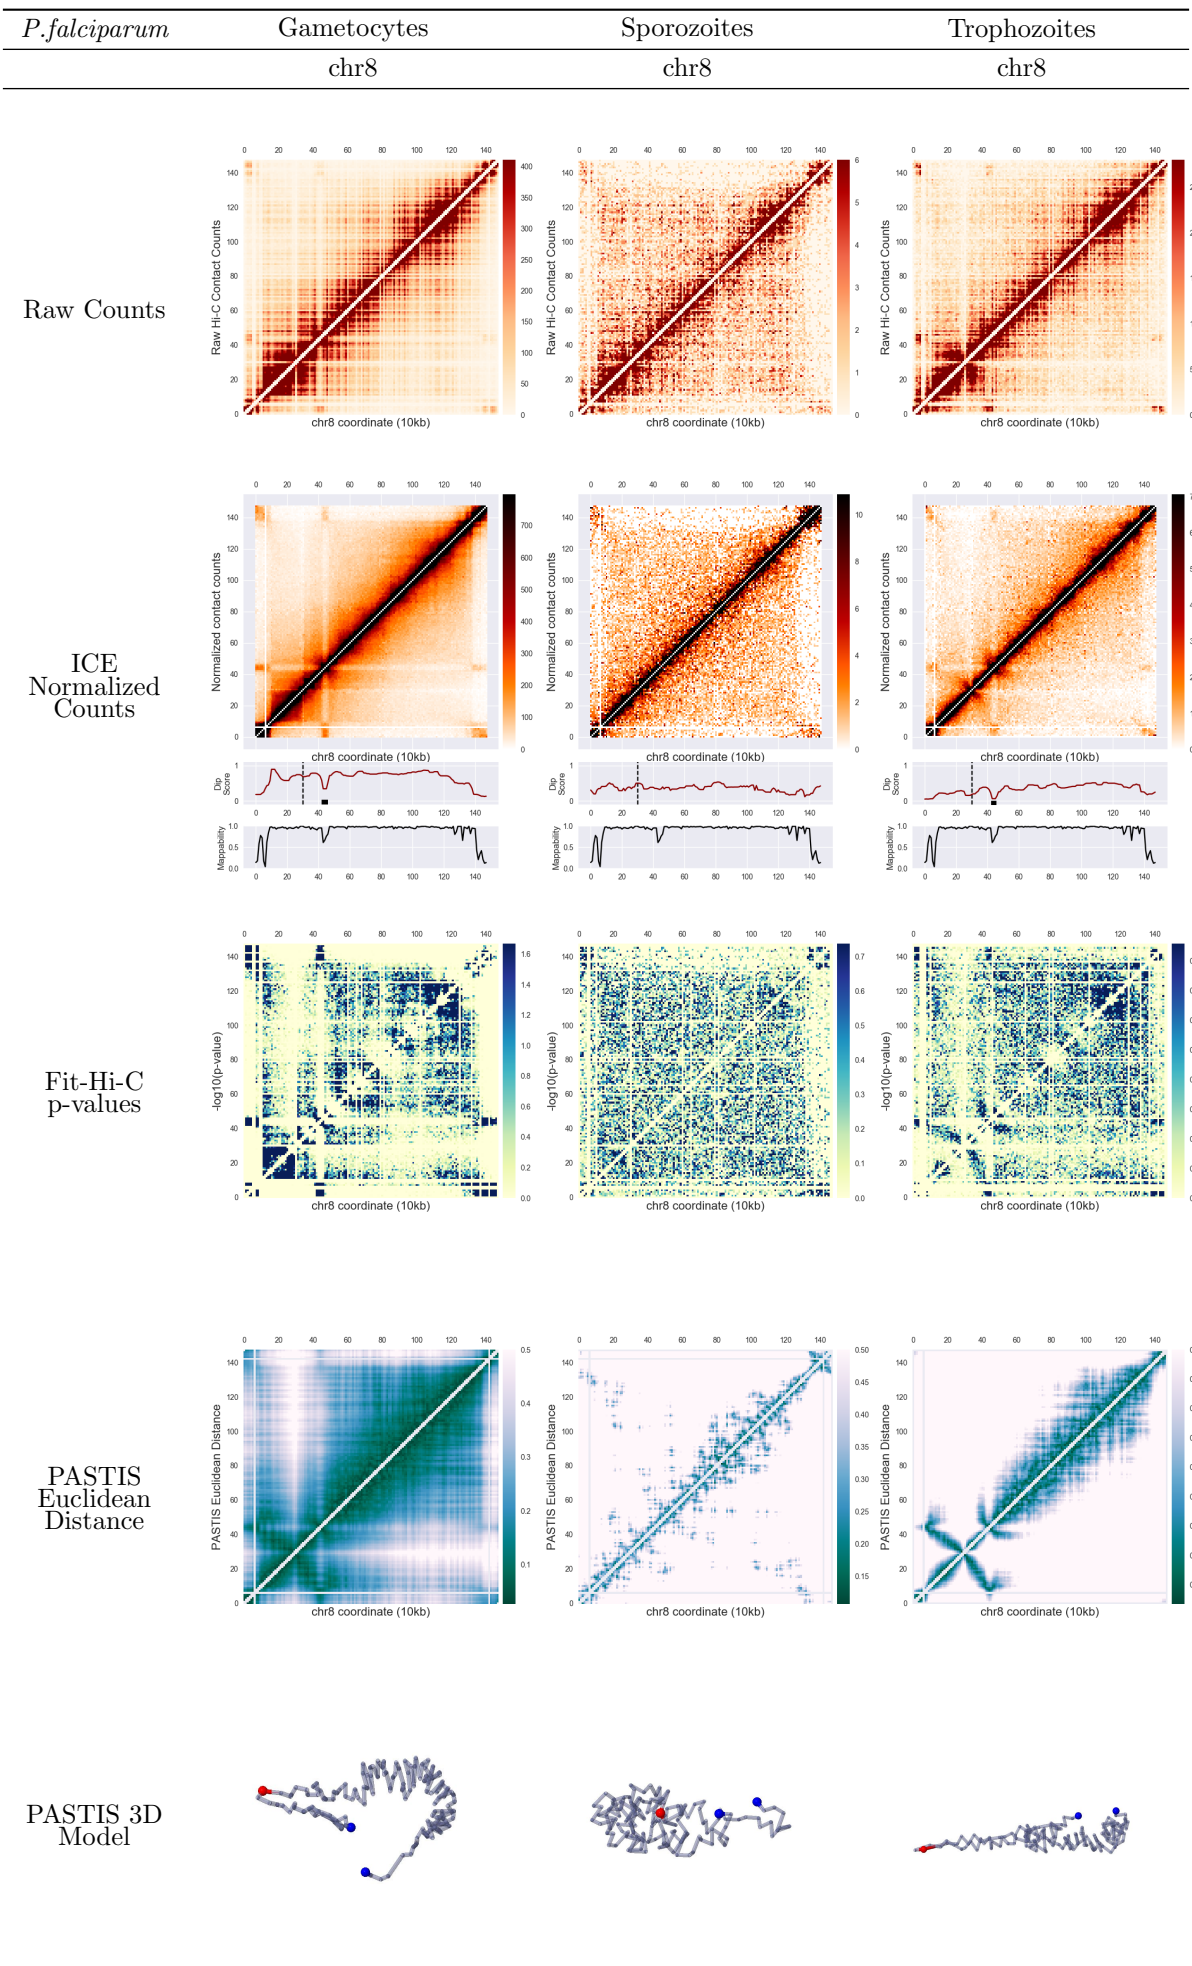

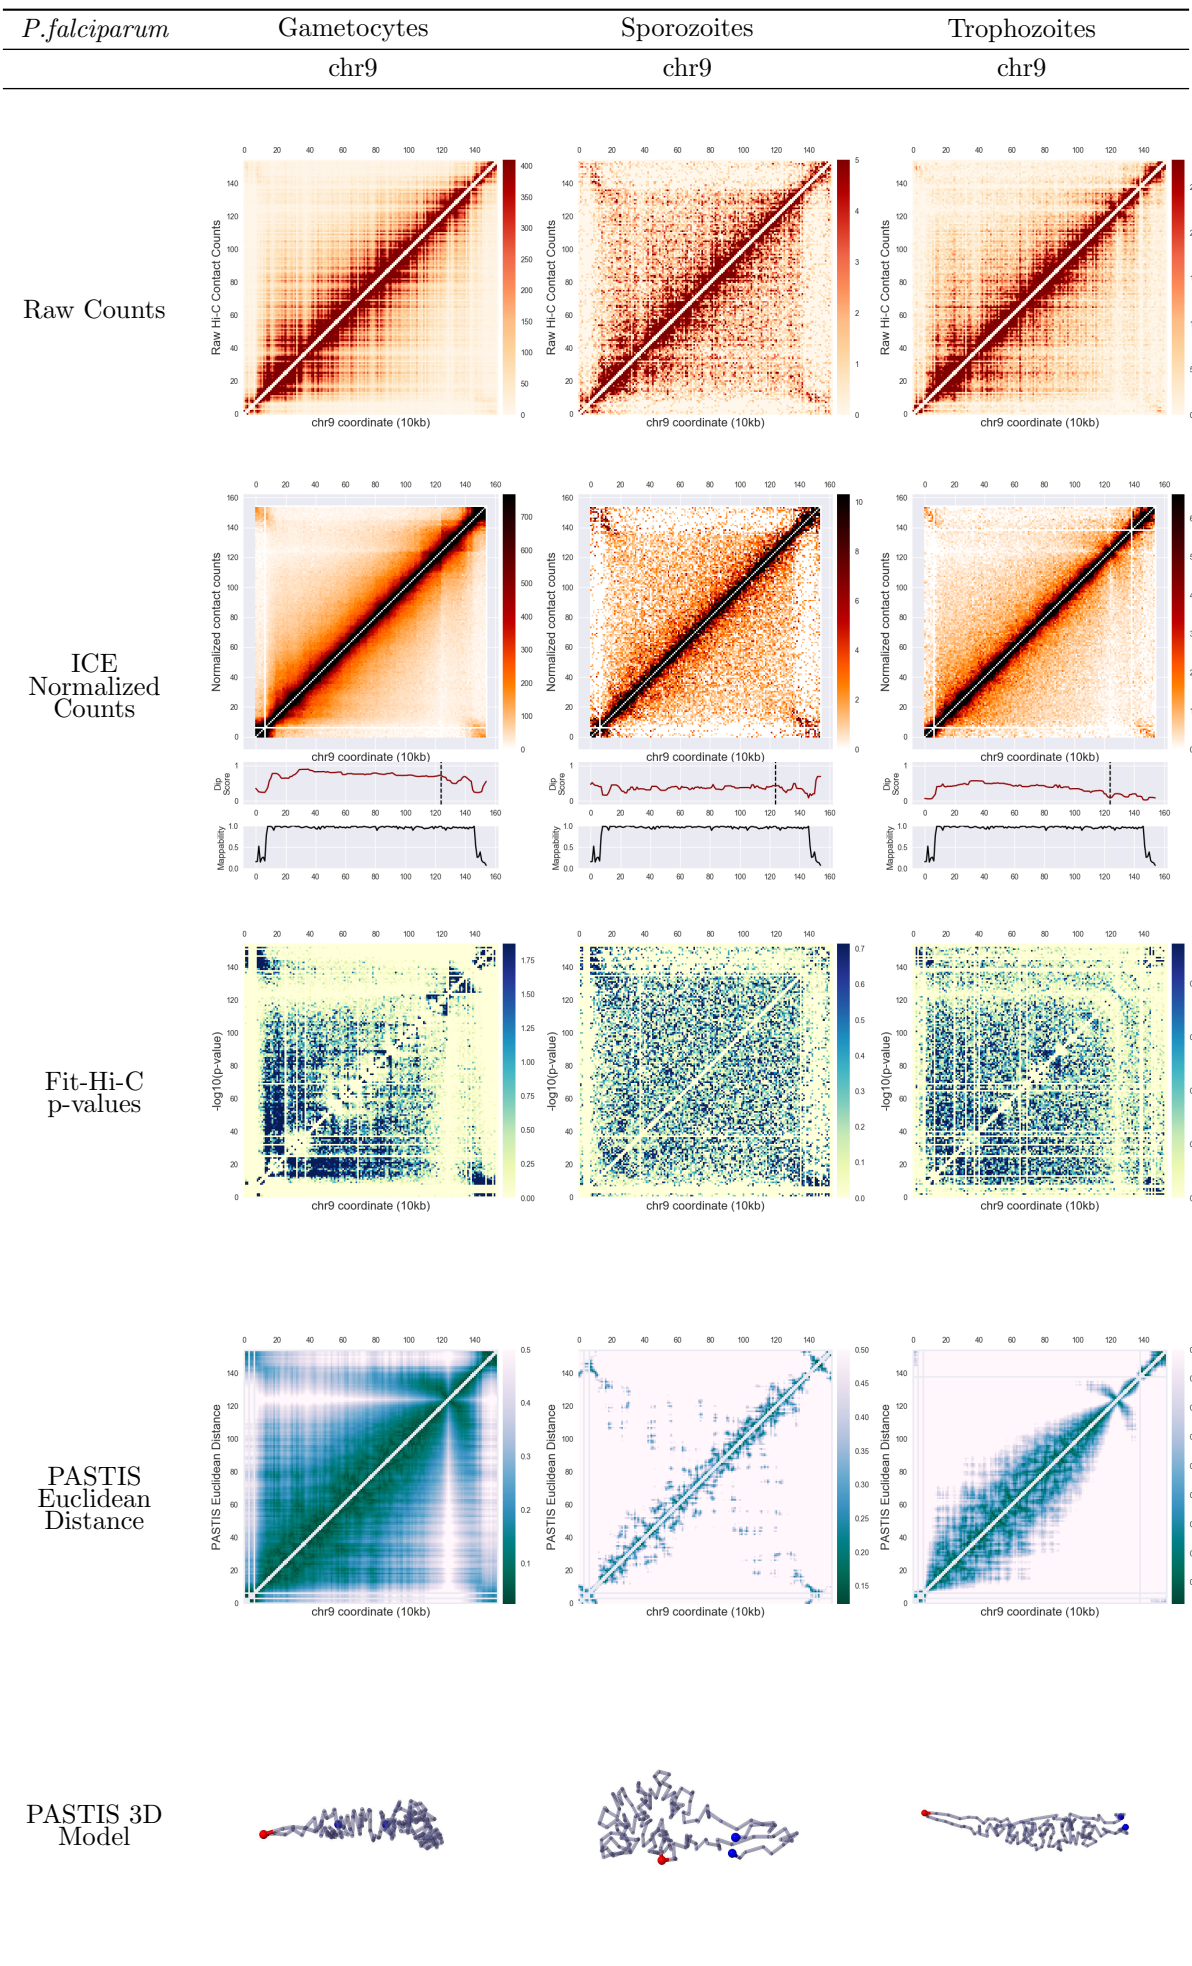

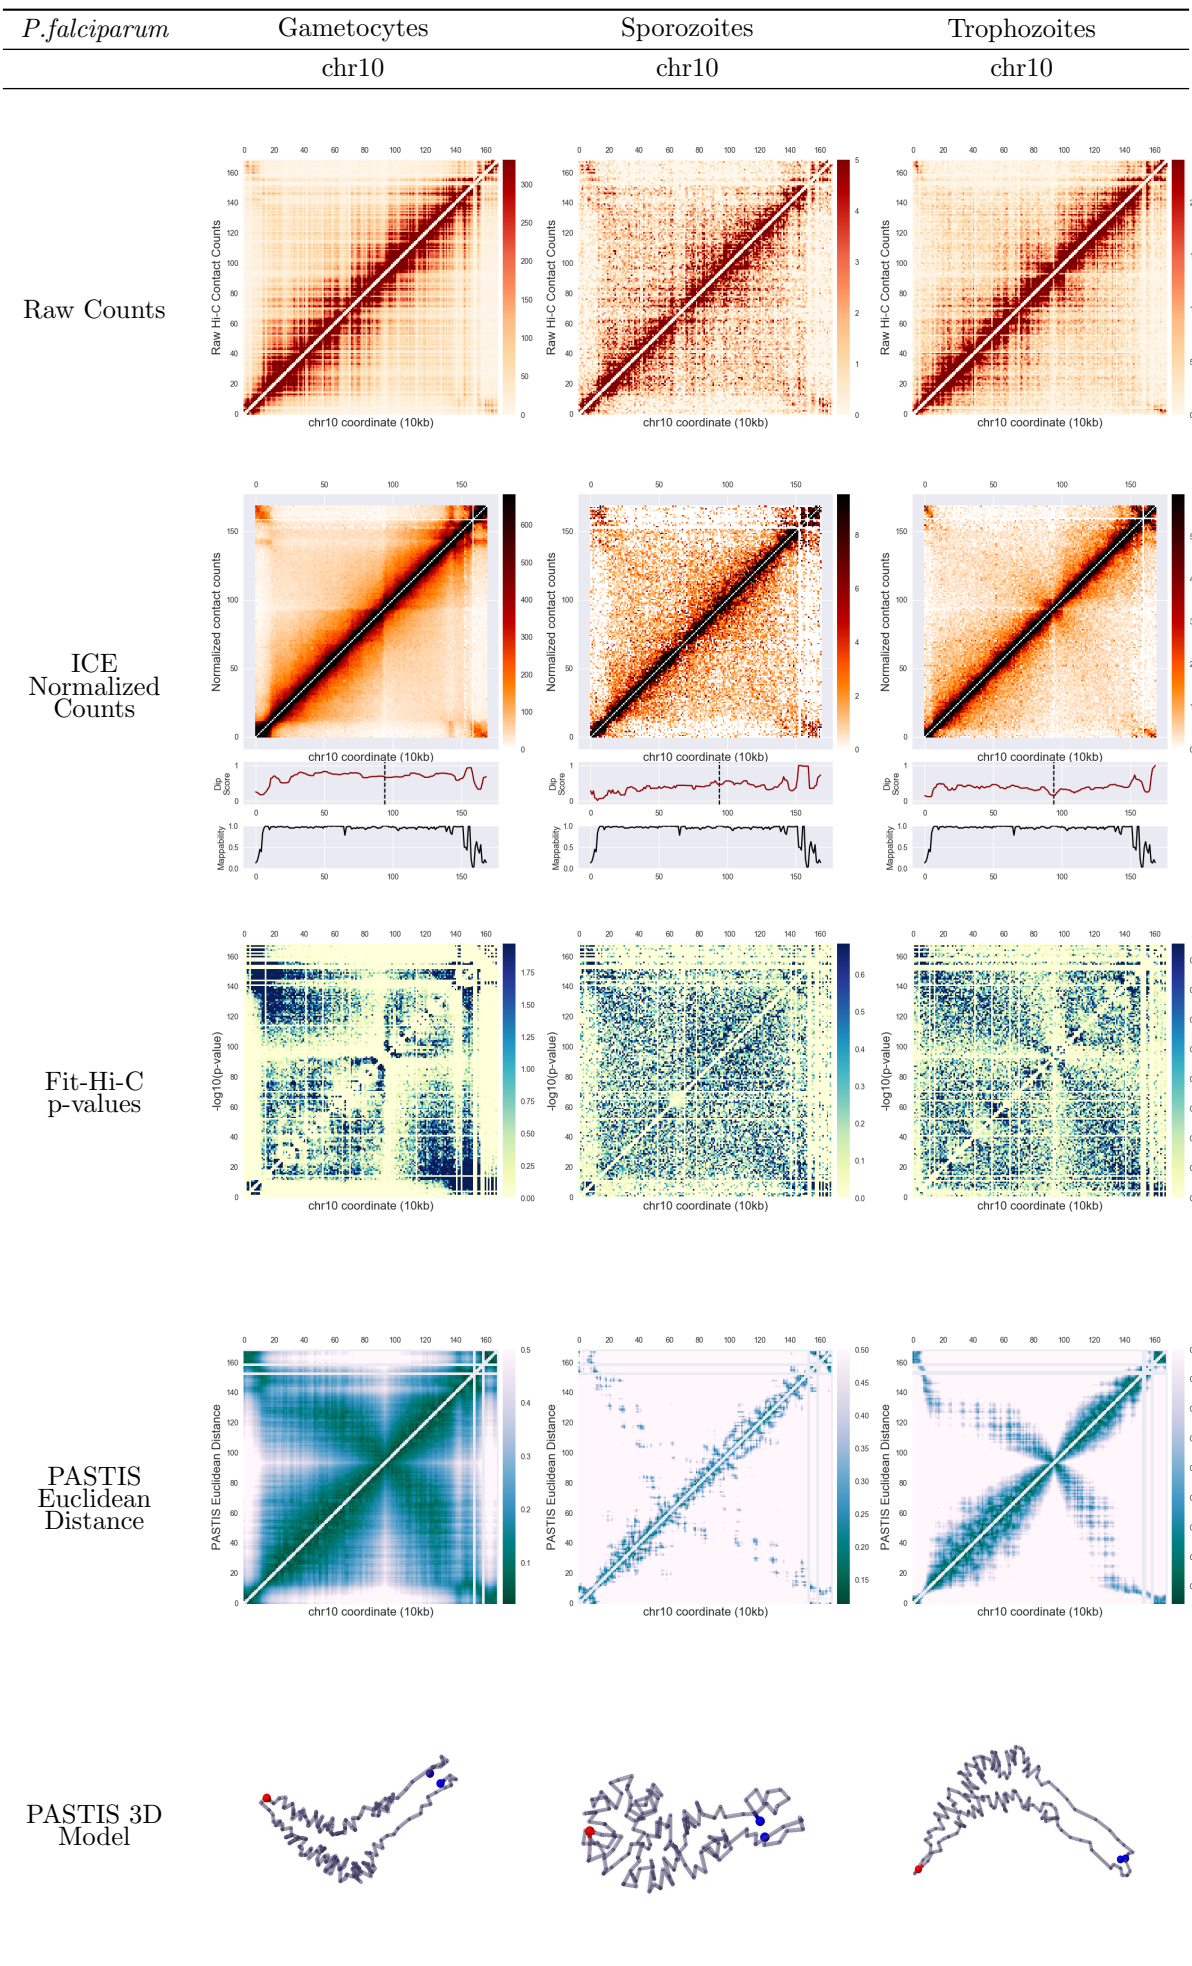

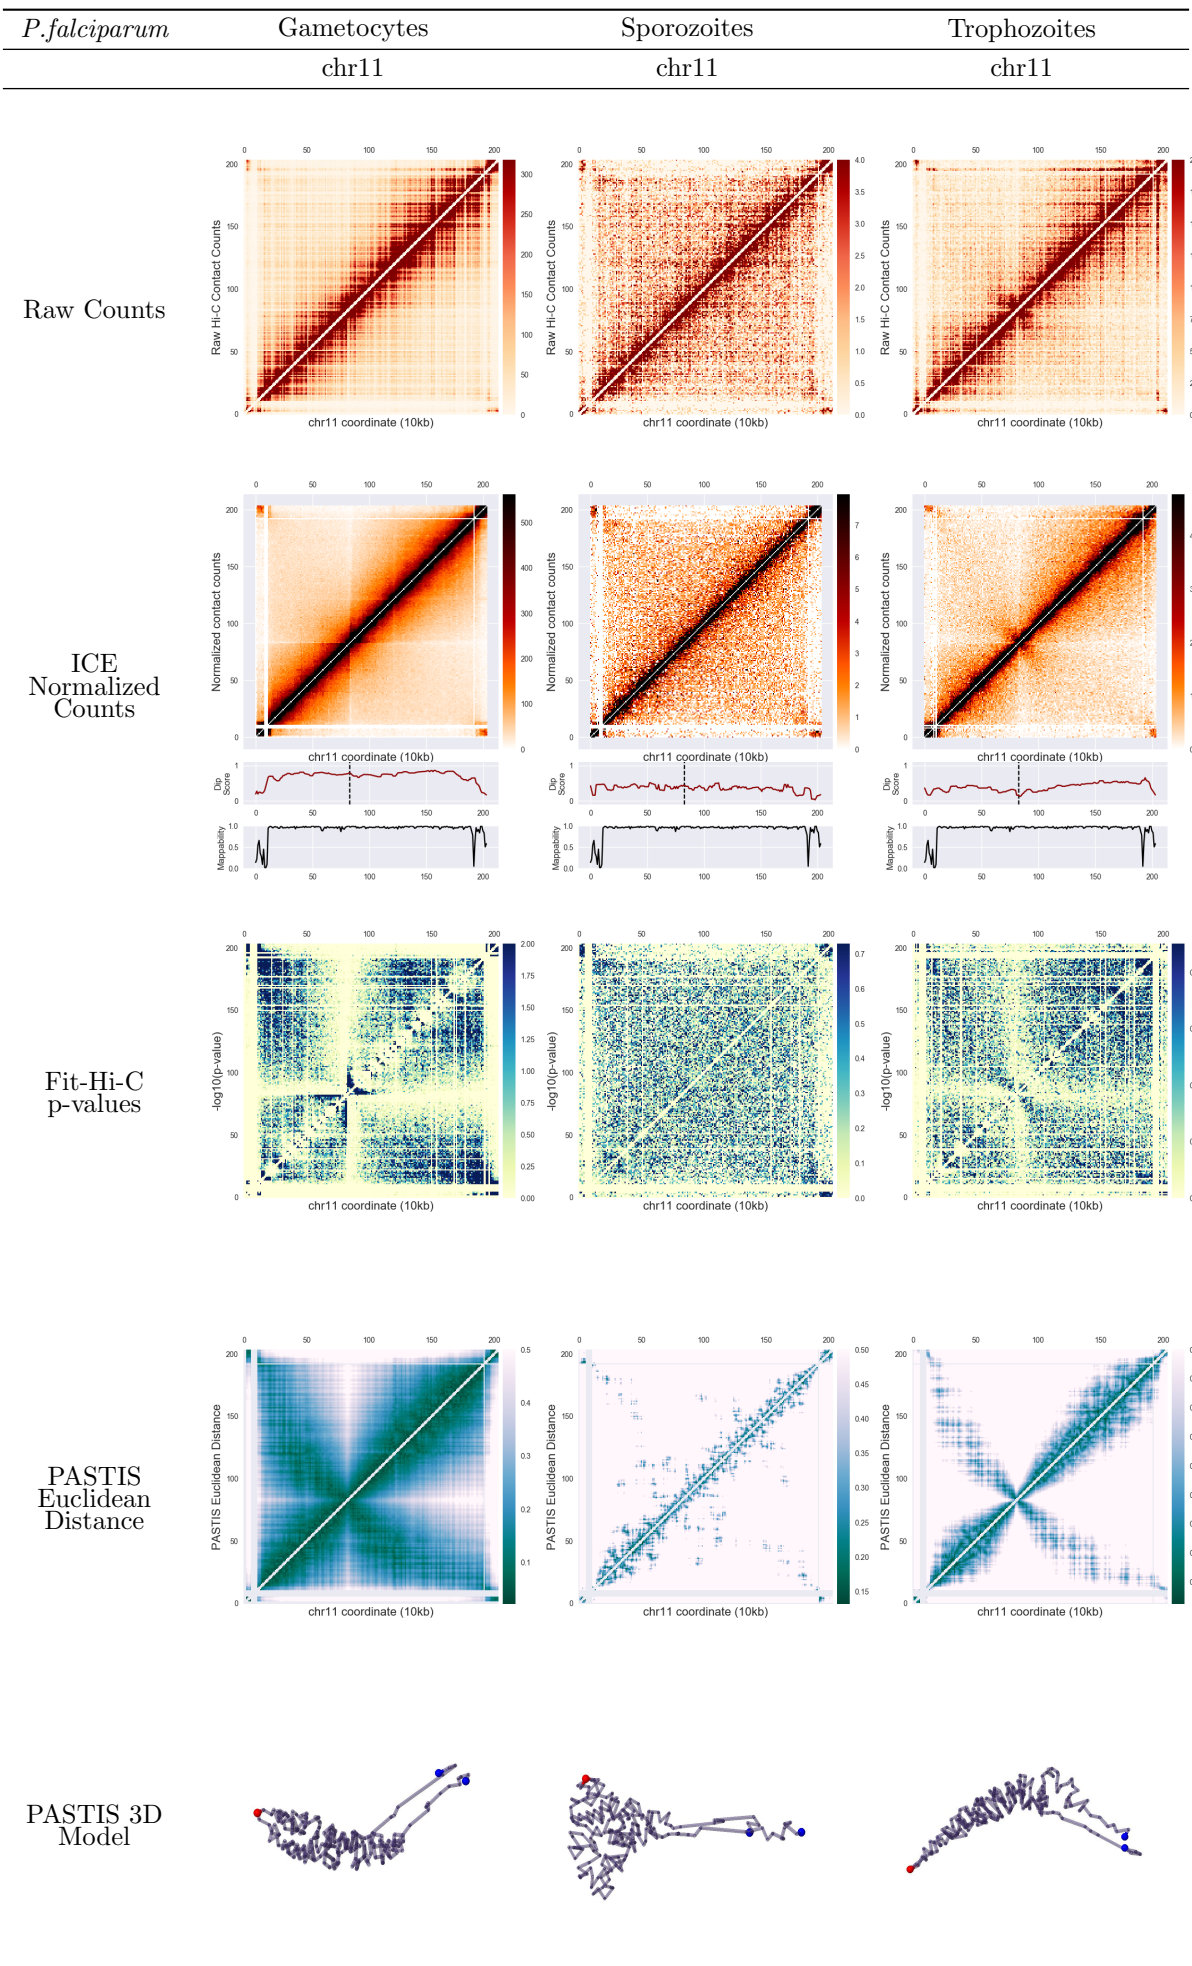

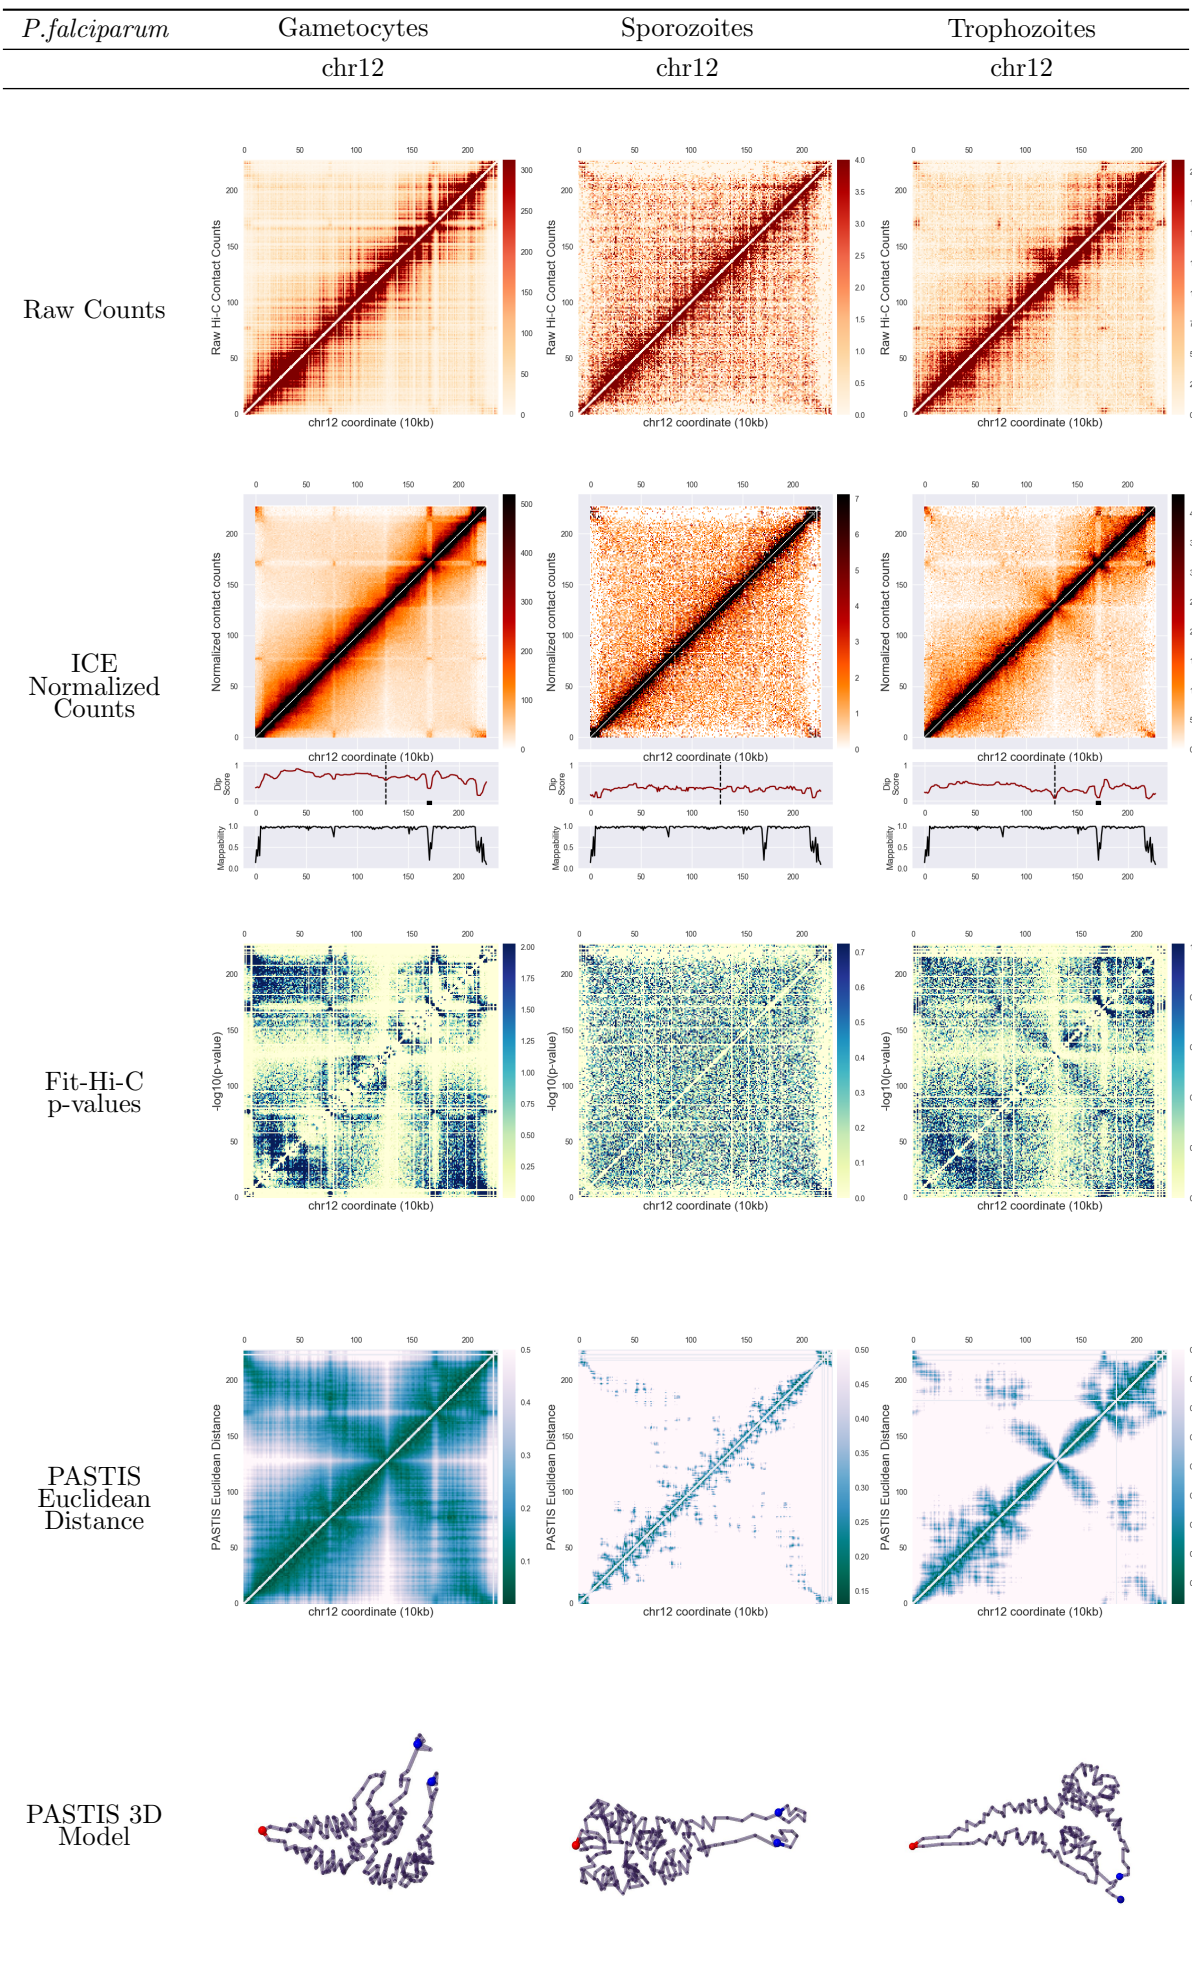

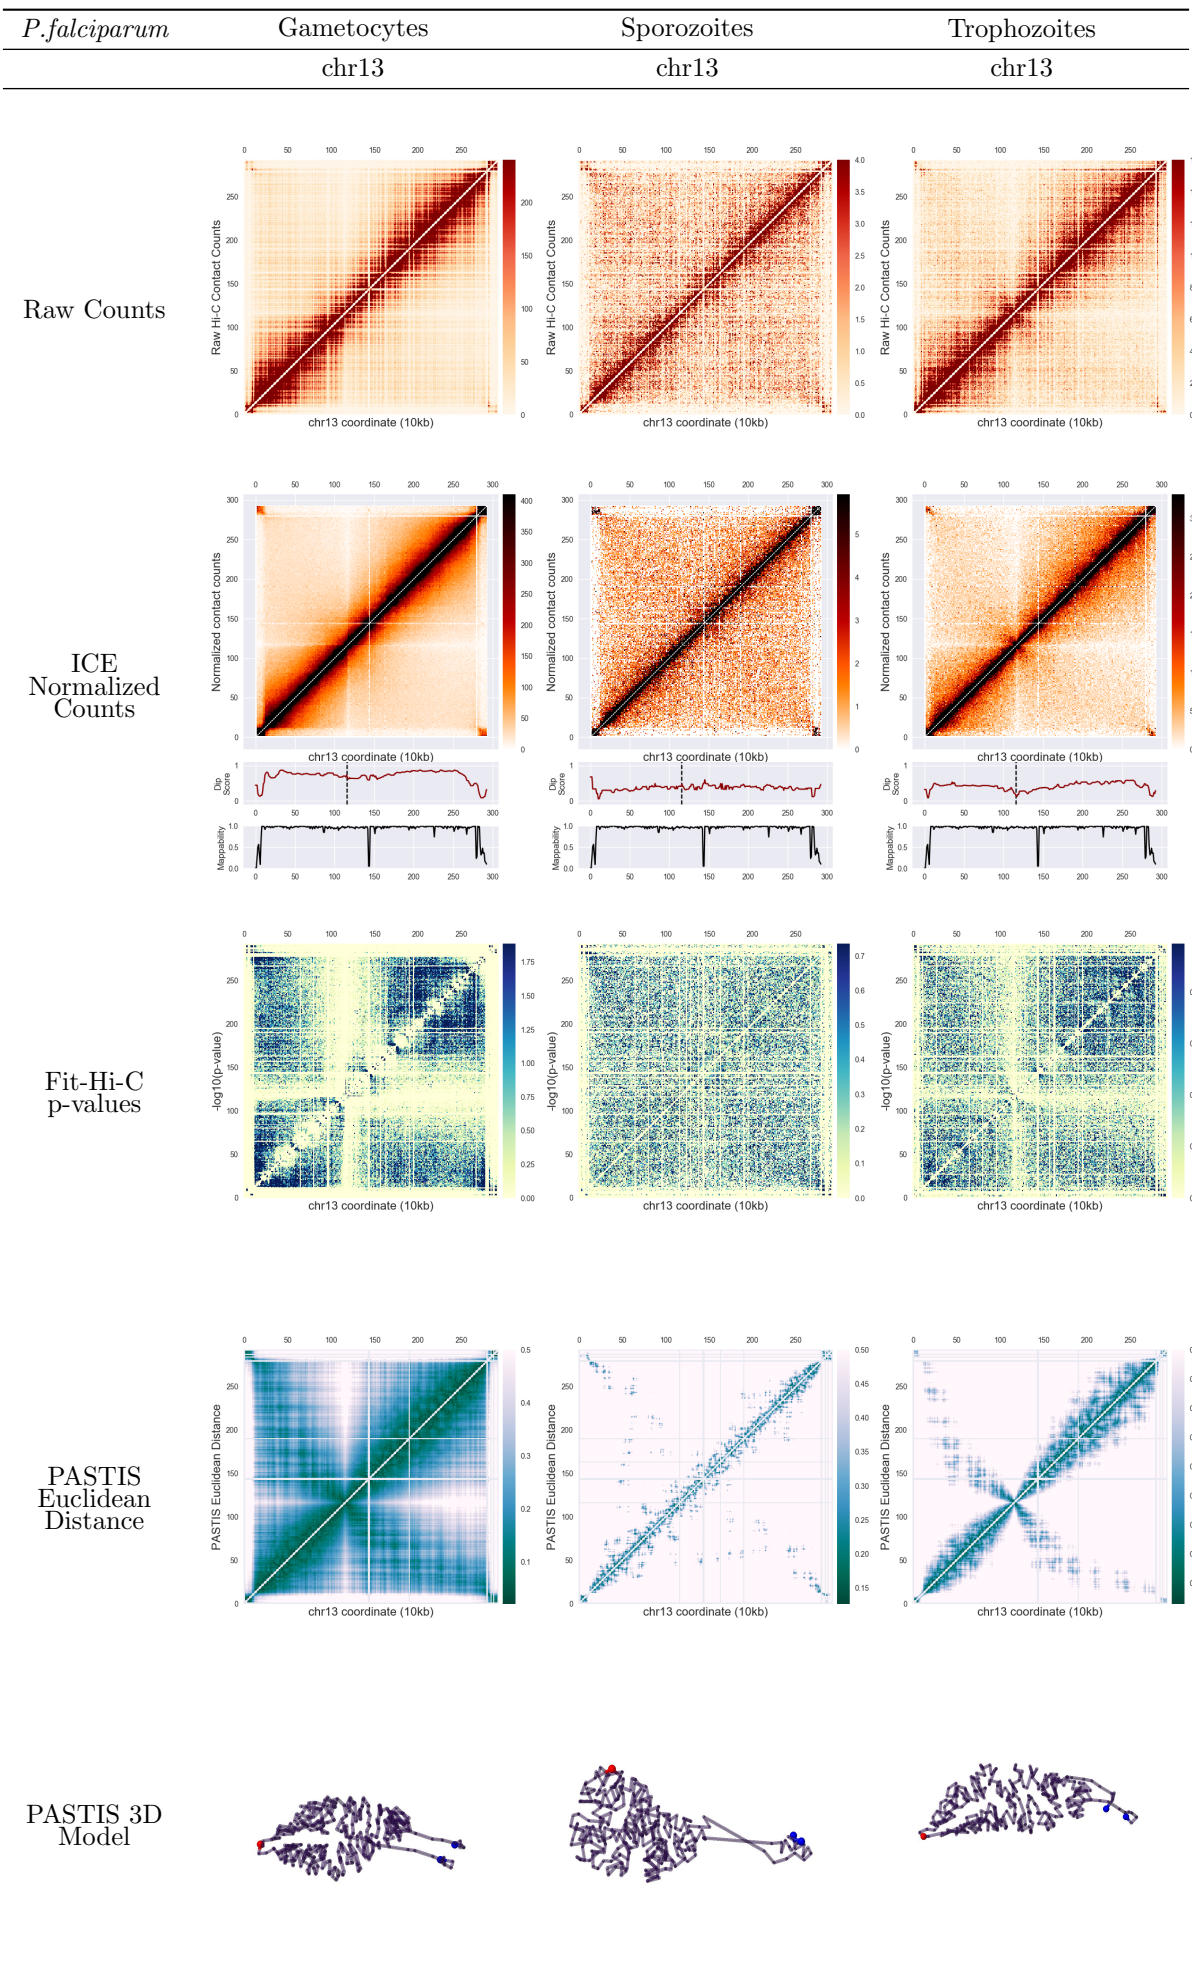

Raw Counts

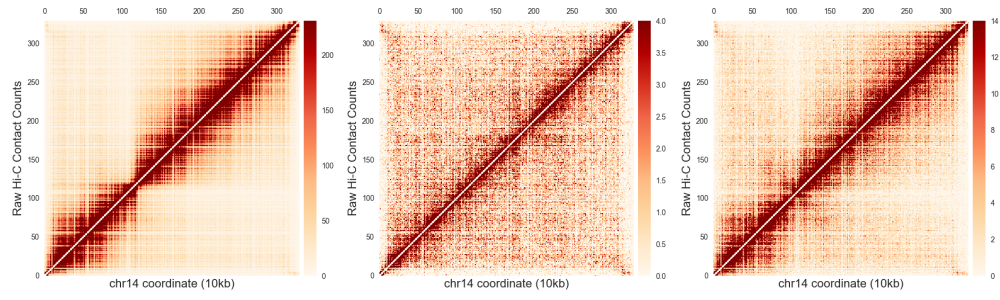

ICE Normalized Counts

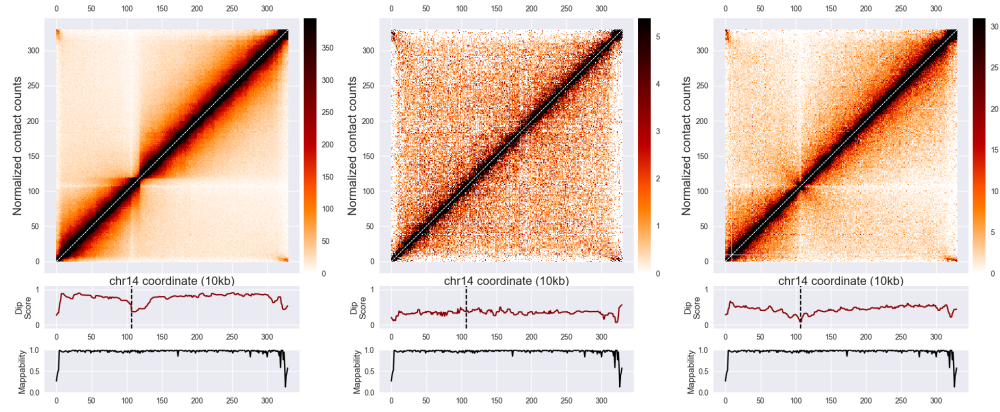

Fit-Hi-C p-values

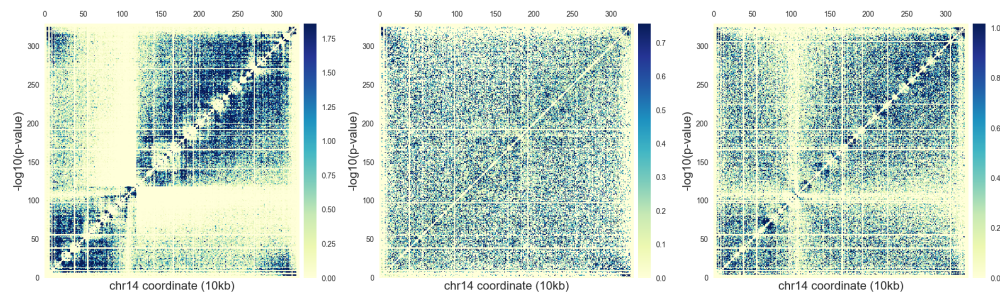

PASTIS Euclidean Distance

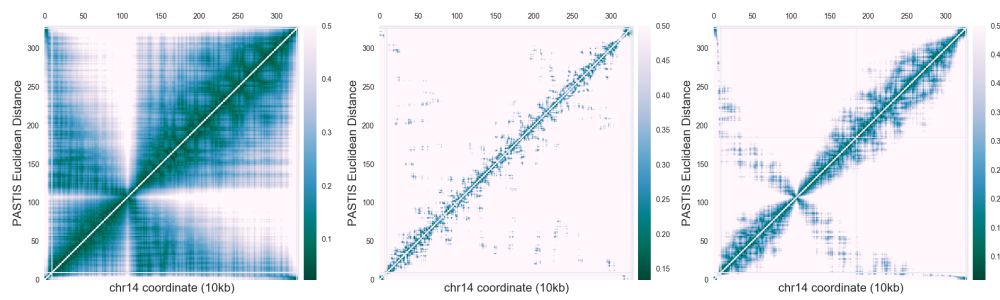

PASTIS 3D Model

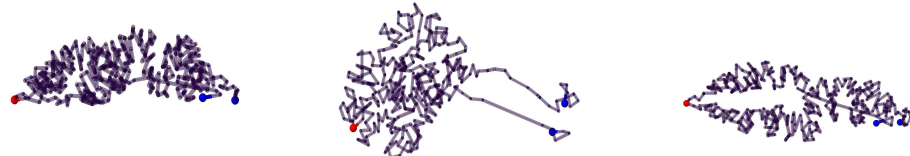

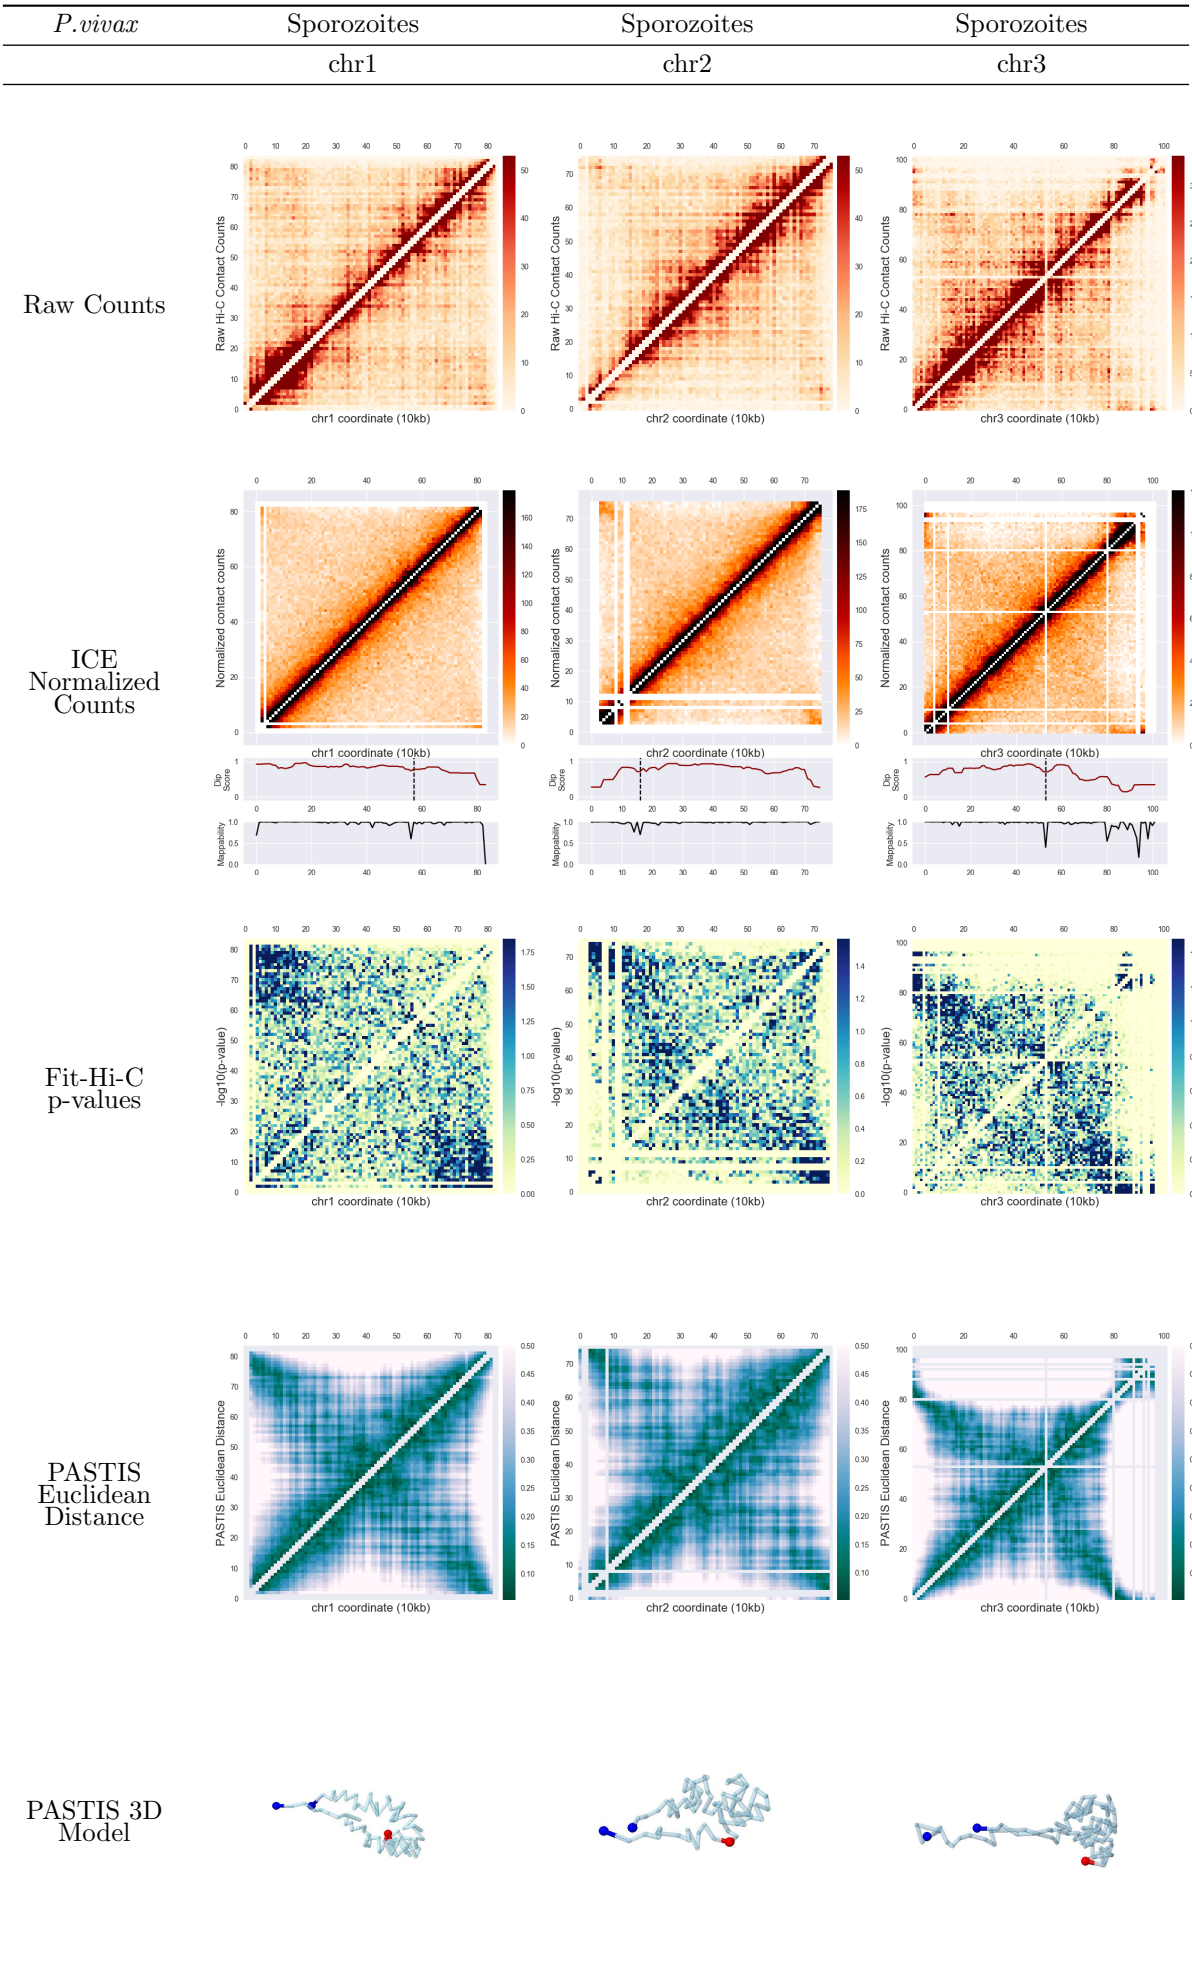



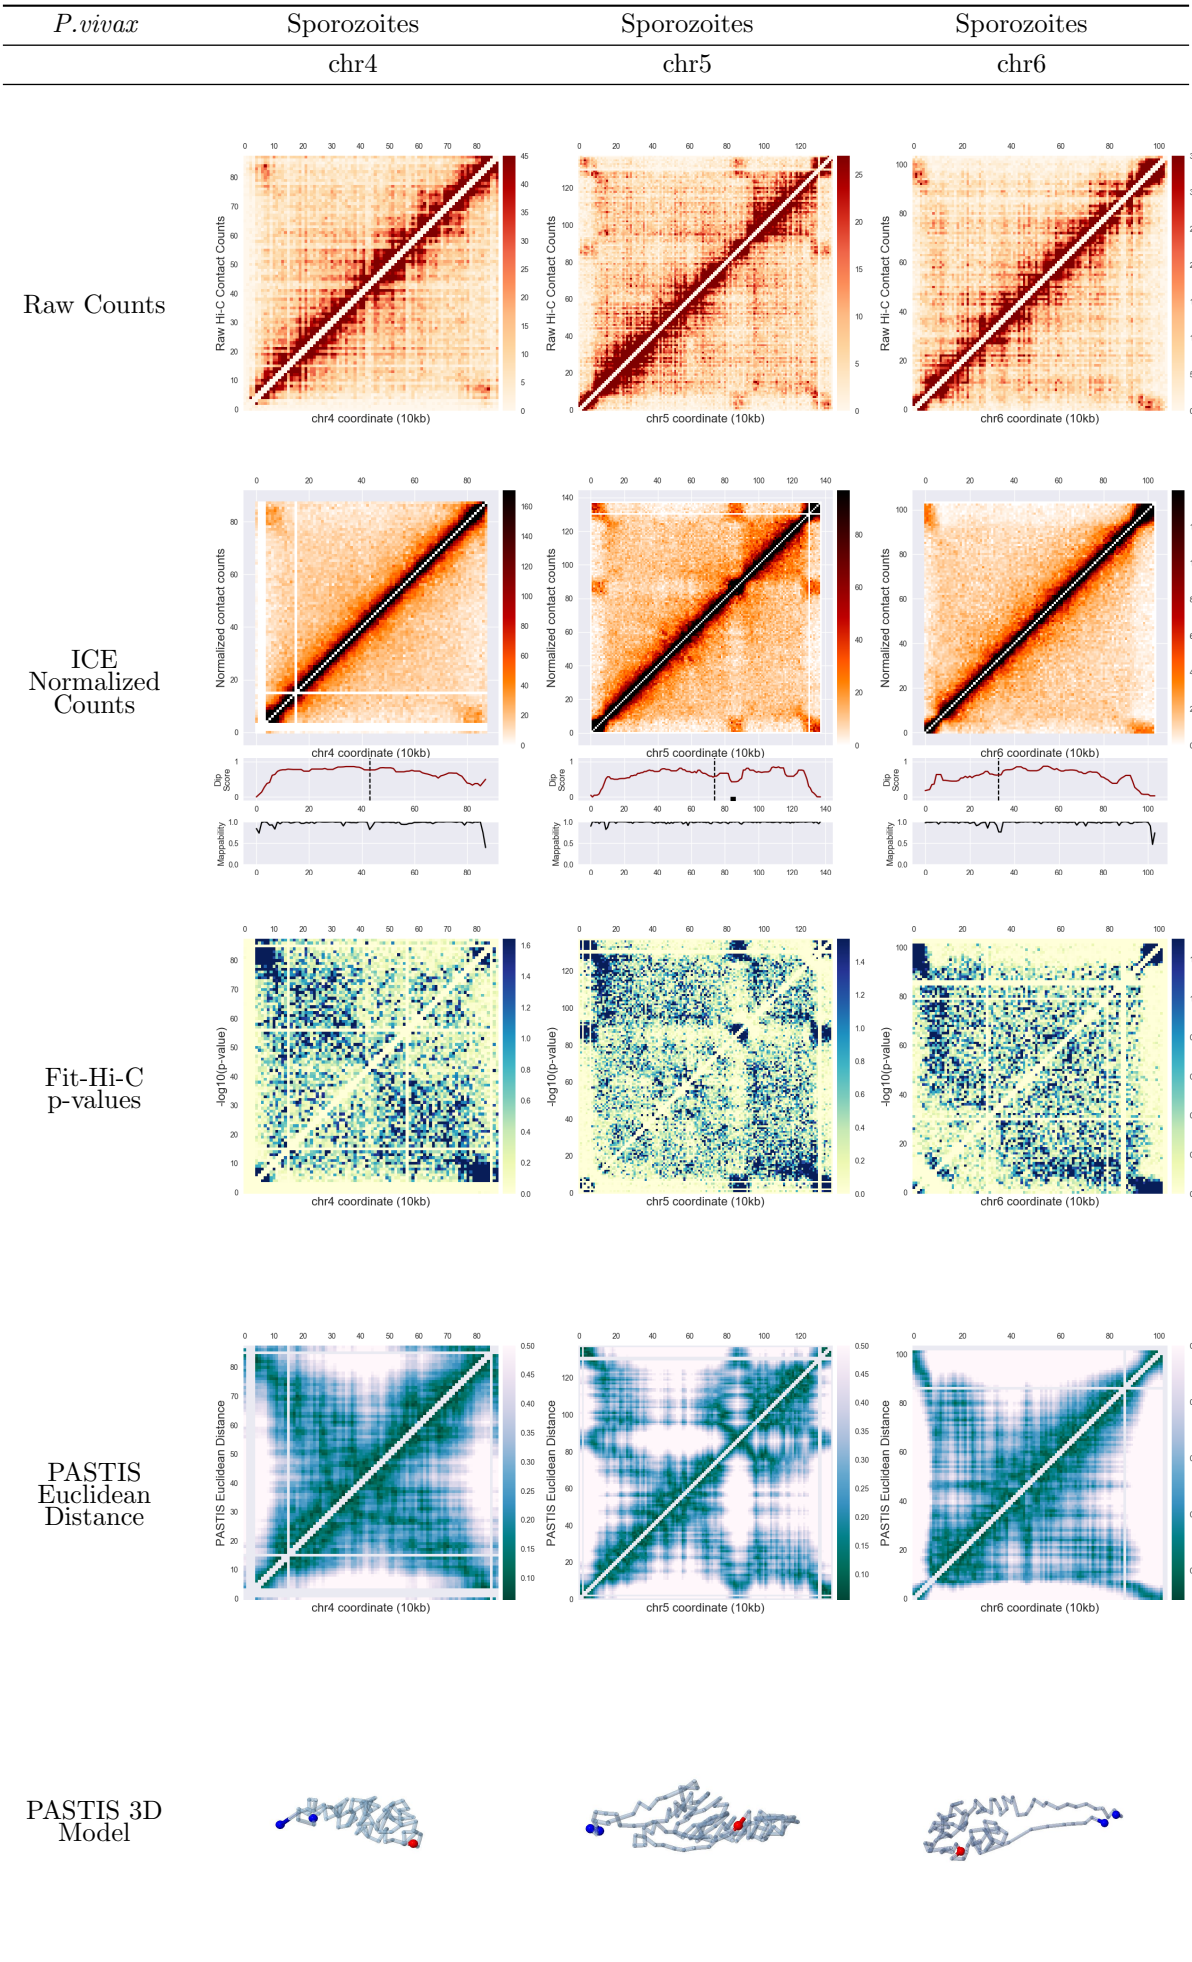

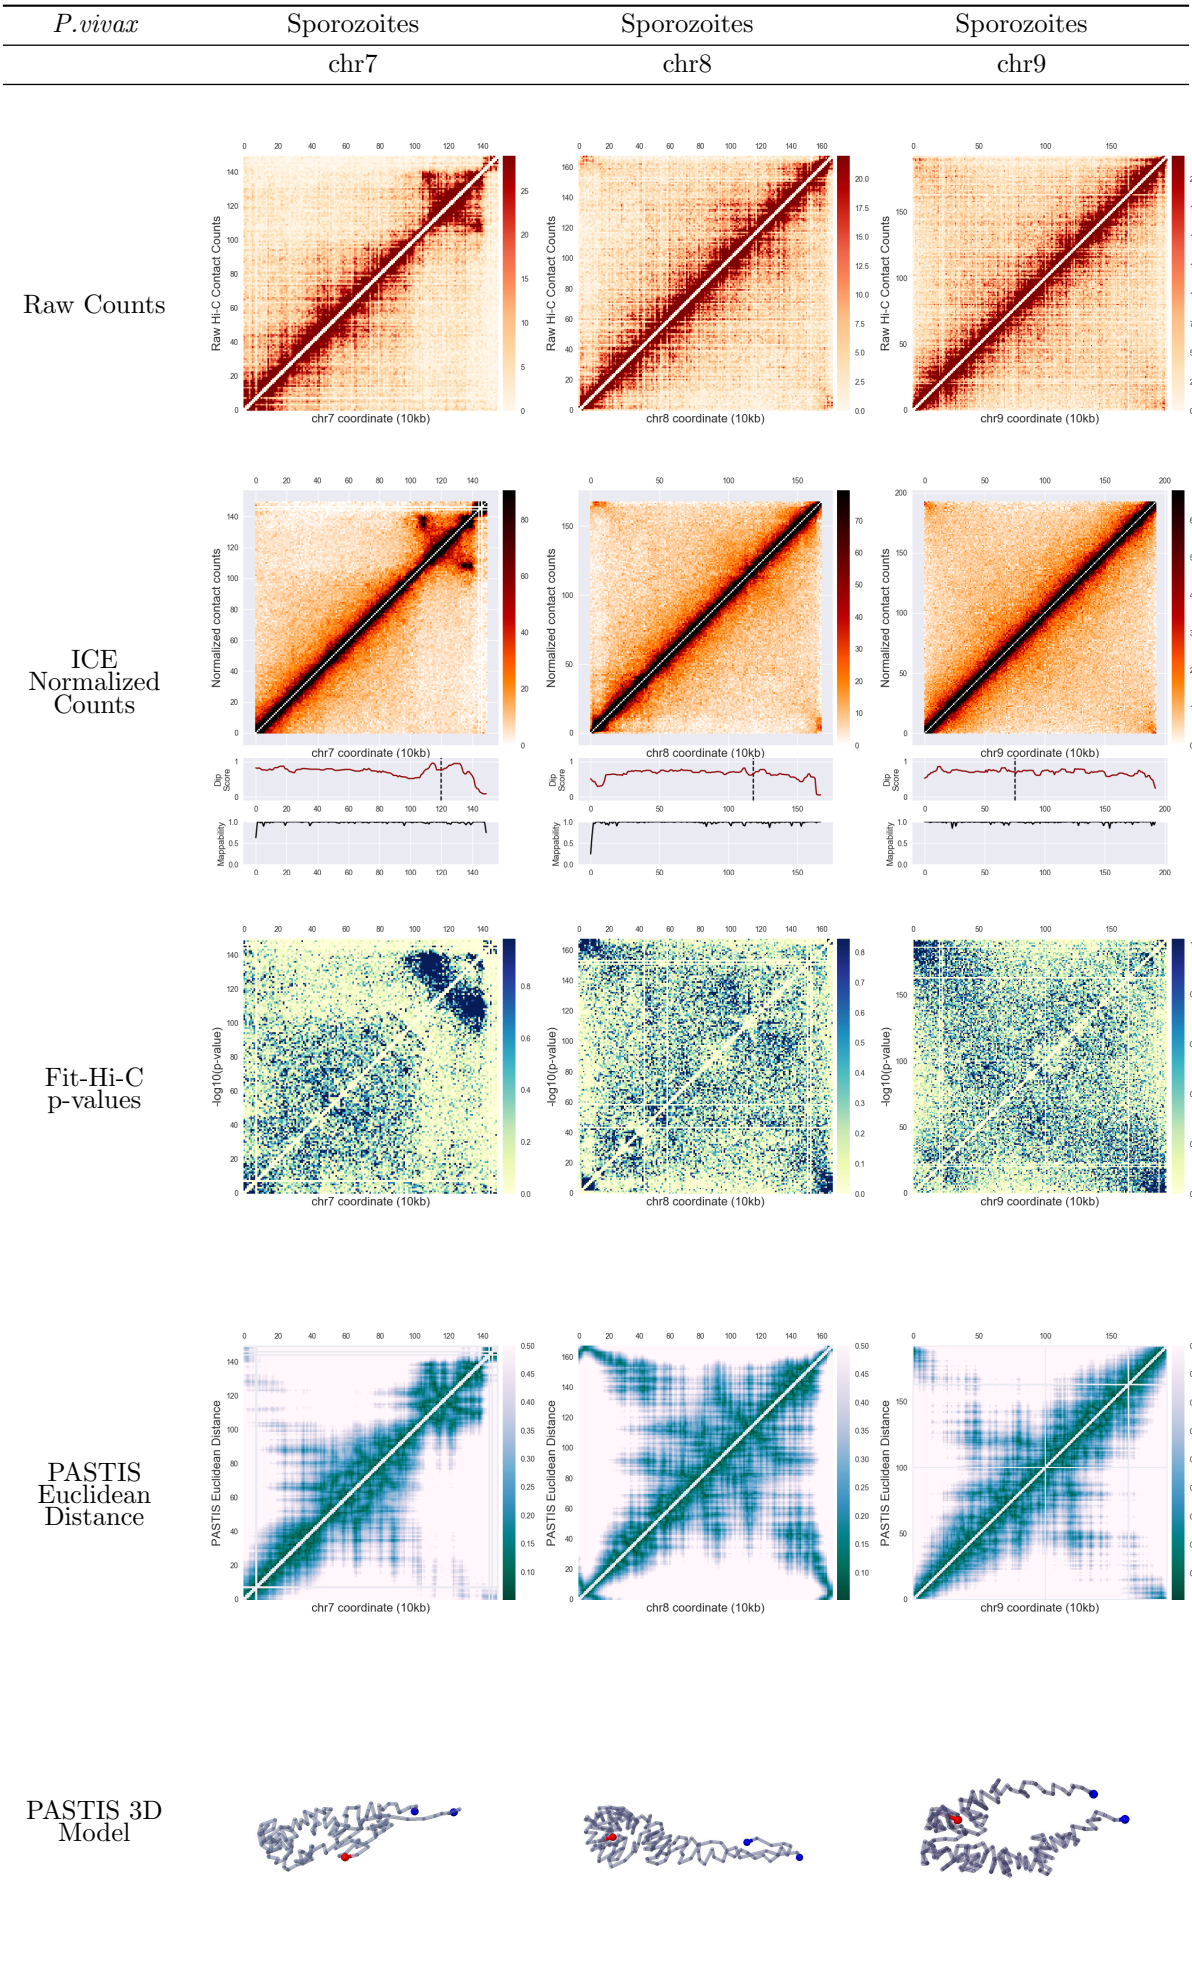

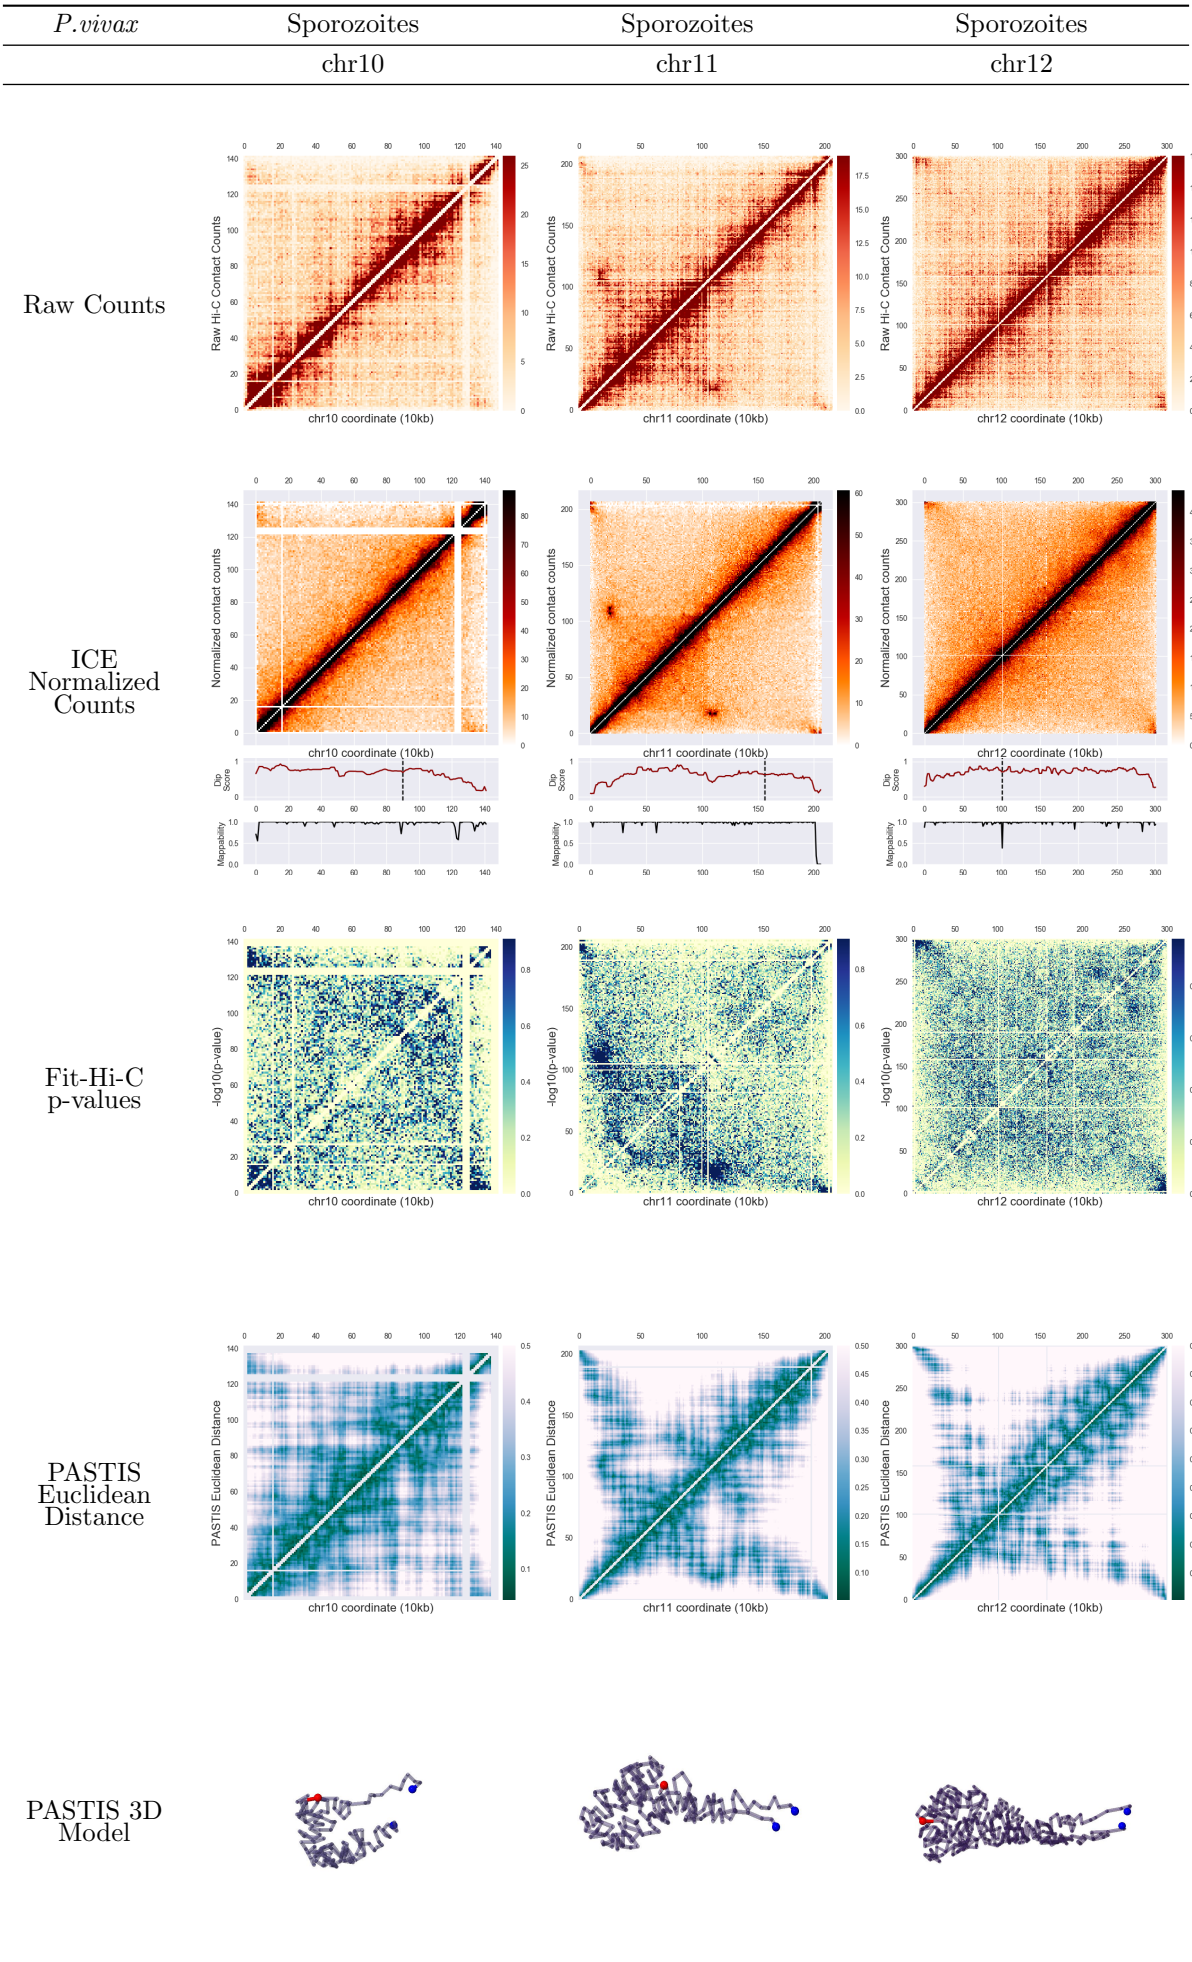

Raw Counts

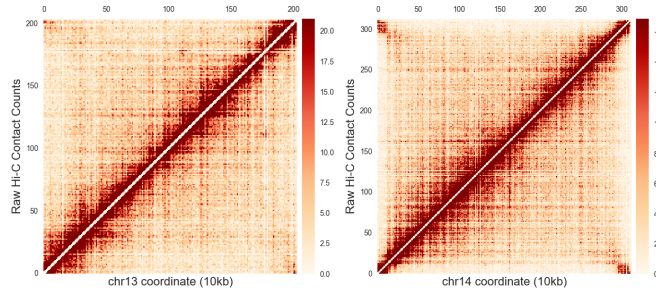

ICE Normalized Counts

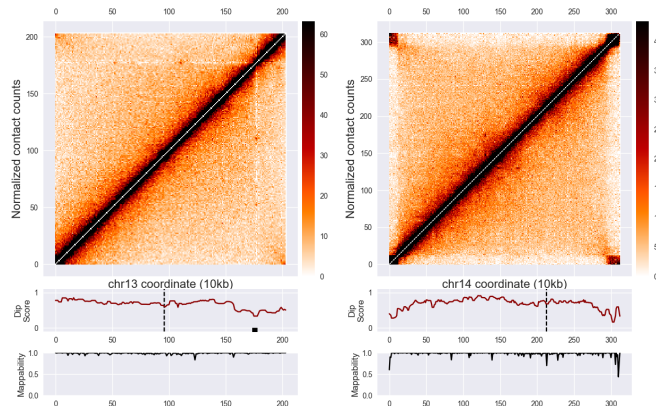

Fit-Hi-C p-values

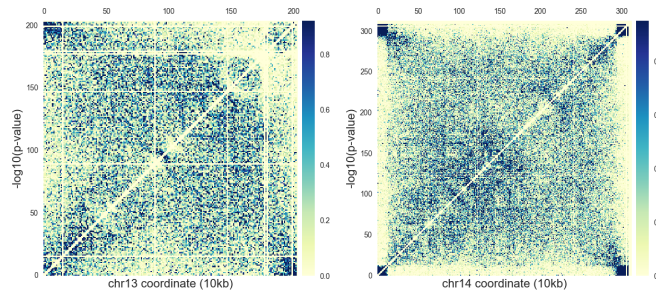

PASTIS Euclidean Distance

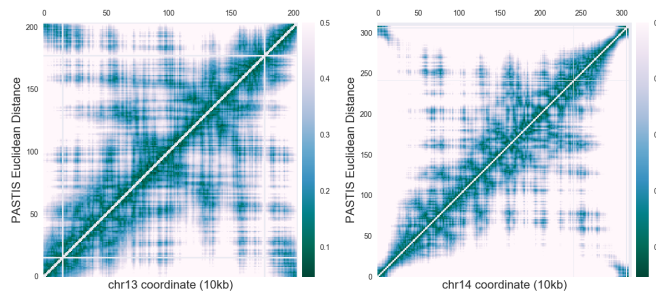

PASTIS 3D Model

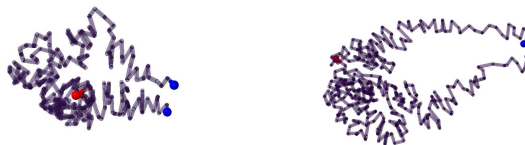

Supplement: pnas.1810815116.sd01.pdf [file pnas.1810815116.sd01.pdf]
